# Supplementary material for: AKT/protein kinase B associates with β-actin in the nucleus of melanoma cells
Source: PubMed Central journal article supplement (PMC6356016; doi:10.1042/bsr20181312), 2019-01-30
Supplement: bsr20181312_Supp1.pdf [file bsr20181312_Supp1.pdf]

## Supplementary Material

**Table S1** The protein and Peptides information identified by MS/MS analysis.

**Table S1.** The protein and Peptides information identified by MS/MS.

| Cell line       | Treatment        | Protein Group          | Protein ID | Protein Accession                    | Peptide                 | Unique                                                               | -10lgP               | Mass    | Length | ppm     | m/z       | z         | RT     | Scan      | #Spec | Start     | End | PTM           |     |  |
|-----------------|------------------|------------------------|------------|--------------------------------------|-------------------------|----------------------------------------------------------------------|----------------------|---------|--------|---------|-----------|-----------|--------|-----------|-------|-----------|-----|---------------|-----|--|
| A2058           | unstimulated     | 3                      | 119661     | P60709 ACTB_HUMAN ( $\beta$ -actin)  | K.SYELPDGQVITIGNER.F    | N                                                                    | 98,36                | 1789,88 | 16     | 0,5     | 1790,9    | 1         | -      | F27:80521 | 19    | 239       | 254 |               |     |  |
|                 |                  |                        |            |                                      | R.VAPEEHPVLLTEAPLNPK.A  | N                                                                    | 84,57                | 1953,06 | 18     | 1,6     | 1954,1    | 1         | -      | F26:66857 | 16    | 96        | 113 |               |     |  |
|                 |                  |                        |            |                                      | R.GYSFTTAAER.E          | N                                                                    | 77,98                | 1131,52 | 10     | 2,6     | 1132,5    | 1         | -      | F27:75738 | 33    | 197       | 206 |               |     |  |
|                 |                  |                        |            |                                      | K.QEYDESGPSIVHR.K       | N                                                                    | 76,57                | 1515,7  | 13     | 0,8     | 1516,7    | 1         | -      | F7:17553  | 11    | 360       | 372 |               |     |  |
|                 |                  |                        |            |                                      | K.AGFAGDDAPR.A          | N                                                                    | 71,26                | 975,441 | 10     | 1,8     | 976,45    | 1         | -      | F27:74647 | 17    | 19        | 28  |               |     |  |
|                 |                  |                        |            |                                      | R.AVFPSIVGRPR.H         | N                                                                    | 69,02                | 1197,7  | 11     | 1,5     | 1198,7    | 1         | -      | F27:77396 | 14    | 29        | 39  |               |     |  |
|                 |                  |                        |            |                                      | K.DSYVGDEAQSQR.G        | N                                                                    | 67,08                | 1353,62 | 12     | 3,3     | 1354,6    | 1         | -      | F27:73773 | 2     | 51        | 62  |               |     |  |
|                 |                  |                        |            |                                      | K.EITALAPSTM(+15.99)K.I | N                                                                    | 56,31                | 1176,61 | 11     | 1,2     | 1177,6    | 1         | -      | F28:87183 | 12    | 316       | 326 | Oxidation (M) |     |  |
|                 |                  |                        |            |                                      | V.FPSIVGRPR.H           | N                                                                    | 51,48                | 1027,59 | 9      | 3,7     | 1028,6    | 1         | -      | F27:77387 | 12    | 31        | 39  |               |     |  |
|                 |                  |                        |            |                                      | R.DLTDYLM(+15.99)K.I    | N                                                                    | 45,81                | 1013,47 | 8      | 1,6     | 1014,5    | 1         | -      | F27:79586 | 9     | 184       | 191 | Oxidation (M) |     |  |
|                 |                  | F.PSIVGRPR.H           | N          | 41,49                                | 880,524                 | 8                                                                    | 1,2                  | 881,53  | 1      | -       | F27:77392 | 6         | 32     | 39        |       |           |     |               |     |  |
|                 |                  | R.AVFPSIVGR.P          | N          | 38,14                                | 944,544                 | 9                                                                    | 1                    | 945,55  | 1      | -       | F27:79072 | 7         | 29     | 37        |       |           |     |               |     |  |
|                 |                  |                        |            | 79                                   | 119973                  | P22626-2 ROA2_HUMAN (Heterogeneous nuclear ribonucleoproteins A2/B1) | R.GGNFGFGDSR.G       | Y       | 40,18  | 1012,44 | 10        | -0,6      | 1013,4 | 1         | -     | F1:348    | 8   | 192           | 201 |  |
|                 |                  | R.GGGNFGPGPGSNFR.G     | Y          |                                      |                         |                                                                      | 35,07                | 1376,62 | 15     | 2,3     | 1377,6    | 1         | -      | F8:22395  | 7     | 202       | 216 |               |     |  |
| K.IDTIEITDR.Q   | Y                | 31,45                  | 1187,64    |                                      |                         |                                                                      | 10                   | -1      | 1188,6 | 1       | -         | F1:751    | 5      | 126       | 135   |           |     |               |     |  |
| A2058           | serum stimulated | 4                      | 119659     | P63261 ACTG_HUMAN ( $\gamma$ -actin) | R.VAPEEHPVLLTEAPLNPK.A  | N                                                                    | 84,57                | 1953,06 | 18     | 1,6     | 1954,1    | 1         | -      | F26:66857 | 16    | 96        | 113 |               |     |  |
|                 |                  |                        |            |                                      | R.GYSFTTAAER.E          | N                                                                    | 77,98                | 1131,52 | 10     | 2,6     | 1132,5    | 1         | -      | F27:75738 | 33    | 197       | 206 |               |     |  |
|                 |                  |                        |            |                                      | K.AGFAGDDAPR.A          | N                                                                    | 71,26                | 975,441 | 10     | 1,8     | 976,45    | 1         | -      | F27:74647 | 17    | 19        | 28  |               |     |  |
|                 |                  |                        |            |                                      | R.AVFPSIVGRPR.H         | N                                                                    | 69,02                | 1197,7  | 11     | 1,5     | 1198,7    | 1         | -      | F27:77396 | 14    | 29        | 39  |               |     |  |
|                 |                  |                        |            |                                      | K.DSYVGDEAQSQR.G        | N                                                                    | 67,08                | 1353,62 | 12     | 3,3     | 1354,6    | 1         | -      | F27:73773 | 2     | 51        | 62  |               |     |  |
|                 |                  |                        |            |                                      | K.EITALAPSTMK.I         | N                                                                    | 58,31                | 1160,61 | 11     | 2,5     | 1161,6    | 1         | -      | F27:77306 | 5     | 316       | 326 |               |     |  |
|                 |                  |                        |            |                                      | R.DLTDYLMK.I            | N                                                                    | 46,12                | 997,479 | 8      | -1,8    | 998,48    | 1         | -      | F27:82396 | 6     | 184       | 191 |               |     |  |
|                 |                  |                        |            | 14                                   | 119776                  | Q562R1 ACTBL_HUMAN ( $\beta$ -actin-like protein 2)                  | R.SYELPDGQVITIGNER.F | N       | 98,36  | 1789,88 | 16        | 0,5       | 1790,9 | 1         | -     | F27:80521 | 19  | 240           | 255 |  |
|                 |                  | V.PIYEGYALPHAILR.L     | N          |                                      |                         |                                                                      | 72,99                | 1611,88 | 14     | 0,9     | 1612,9    | 1         | -      | F27:80647 | 3     | 165       | 178 |               |     |  |
|                 |                  | R.TTGIVMDSGD.G         | N          |                                      |                         |                                                                      | 60,34                | 994,428 | 10     | 0,1     | 995,44    | 1         | -      | F27:77623 | 1     | 149       | 158 |               |     |  |
|                 |                  | I.YEGYALPHAILR.L       | N          |                                      |                         |                                                                      | 53,11                | 1401,74 | 12     | 1       | 1402,7    | 1         | -      | F26:67541 | 2     | 167       | 178 |               |     |  |
|                 |                  | R.DLTDYLMK.I           | N          |                                      |                         |                                                                      | 46,12                | 997,479 | 8      | -1,8    | 998,48    | 1         | -      | F27:82396 | 6     | 185       | 192 |               |     |  |
|                 |                  | K.IKIIAPPERK.Y         | N          |                                      |                         |                                                                      | 45,56                | 1163,74 | 10     | 0,8     | 1164,7    | 1         | -      | F26:62401 | 1     | 328       | 337 |               |     |  |
|                 |                  | V.GDEAQSQR.R           | N          |                                      |                         |                                                                      | 34,52                | 733,324 | 7      | -0,8    | 734,33    | 1         | -      | F26:62047 | 4     | 56        | 62  |               |     |  |
|                 |                  | D.GQVITIGNER.F         | N          |                                      |                         |                                                                      | 31,46                | 1085,58 | 10     | 3,4     | 1086,6    | 1         | -      | F27:75874 | 2     | 246       | 255 |               |     |  |
|                 |                  | R.VAPDEHPILLTEAPLNPK.I | Y          |                                      |                         |                                                                      | 25,35                | 1953,06 | 18     | -0,2    | 1954,1    | 1         | -      | F5:11617  | 1     | 97        | 114 |               |     |  |
|                 |                  | E.KIWYHTFYNELR.V       | Y          |                                      |                         |                                                                      | 24,21                | 1668,84 | 12     | 1,6     | 1669,9    | 1         | -      | F27:82758 | 1     | 85        | 96  |               |     |  |
|                 |                  |                        |            | 1                                    | 119658                  | P08670 VIME_HUMAN (vimentin)                                         | R.DGQVINETSQHHDDL.E  | Y       | 81,15  | 1835,79 | 16        | 0,9       | 1836,8 | 1         | -     | F27:75635 | 21  | 451           | 466 |  |
|                 |                  | R.EYQDLLNVK.M          | N          |                                      |                         |                                                                      | 72,59                | 1120,58 | 9      | -1,8    | 1121,6    | 1         | -      | F26:66771 | 18    | 382       | 390 |               |     |  |
|                 |                  | K.FADLSEAAANR.N        | N          |                                      |                         |                                                                      | 61,04                | 1092,52 | 10     | -0,4    | 1093,5    | 1         | -      | F6:14147  | 15    | 295       | 304 |               |     |  |
|                 |                  | R.QDQVDNASLAR.L        | N          |                                      |                         |                                                                      | 56,89                | 1087,53 | 10     | -1      | 1088,5    | 1         | -      | F7:17283  | 11    | 208       | 217 |               |     |  |
|                 |                  | K.VELQELNDR.F          | N          |                                      |                         |                                                                      | 54,22                | 1114,56 | 9      | 0,9     | 1115,6    | 1         | -      | F27:76106 | 15    | 105       | 113 |               |     |  |
| R.DNLAEDIMR.L   | N                | 54,09                  | 1075,5     |                                      |                         |                                                                      | 9                    | 2       | 1076,5 | 1       | -         | F28:90052 | 13     | 176       | 184   |           |     |               |     |  |
| R.LGDLYEEMREL.R | N                | 43,38                  | 1651,79    |                                      |                         |                                                                      | 13                   | 0       | 1652,8 | 1       | -         | F26:67323 | 3      | 146       | 158   |           |     |               |     |  |
|                 |                  |                        |            |                                      | K.LLEGEESR.I            | N                                                                    | 40,34                | 931,461 | 8      | 4       | 932,47    | 1         | -      | F27:74337 | 12    | 403       | 410 |               |     |  |

## **Supplementary Material**

**Figure S1** MS/MS spectra from all peptides identified on Table S1.

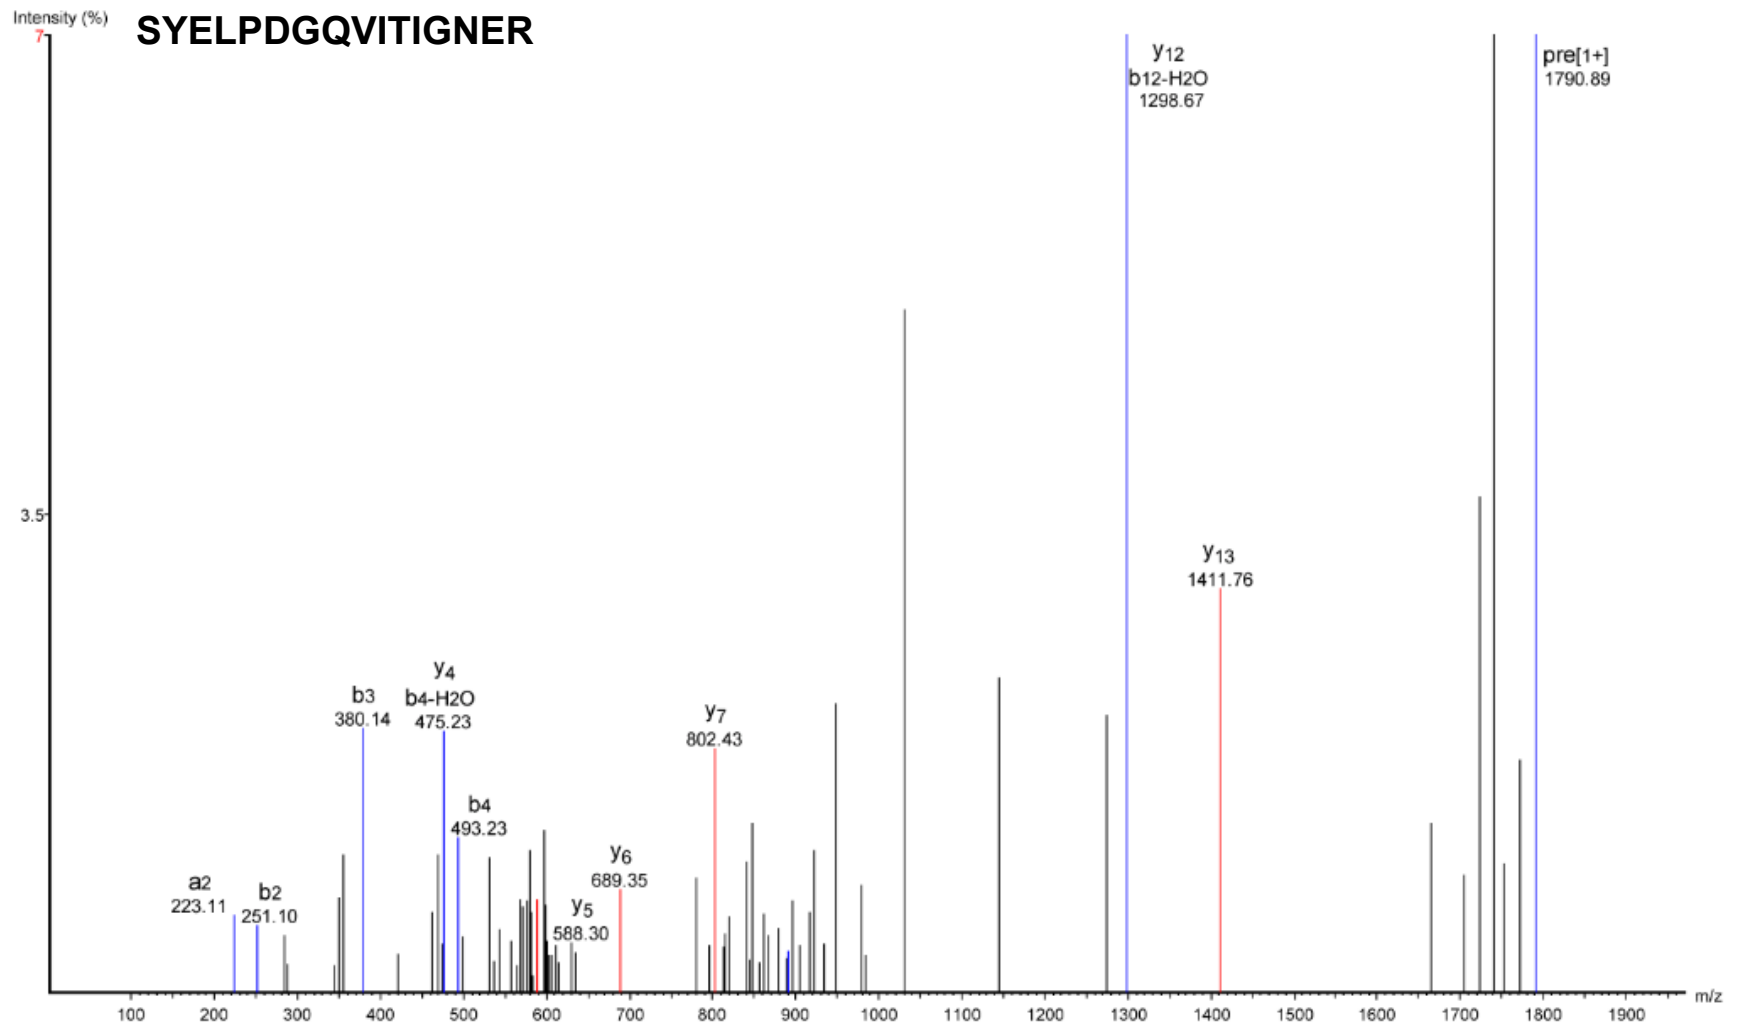

MS/MS spectrum of the peptide SYELPDGQVITIGNER identified from actin (P60709). Deisotoped peptide ion m/z: 1790.89<sup>+1</sup>.

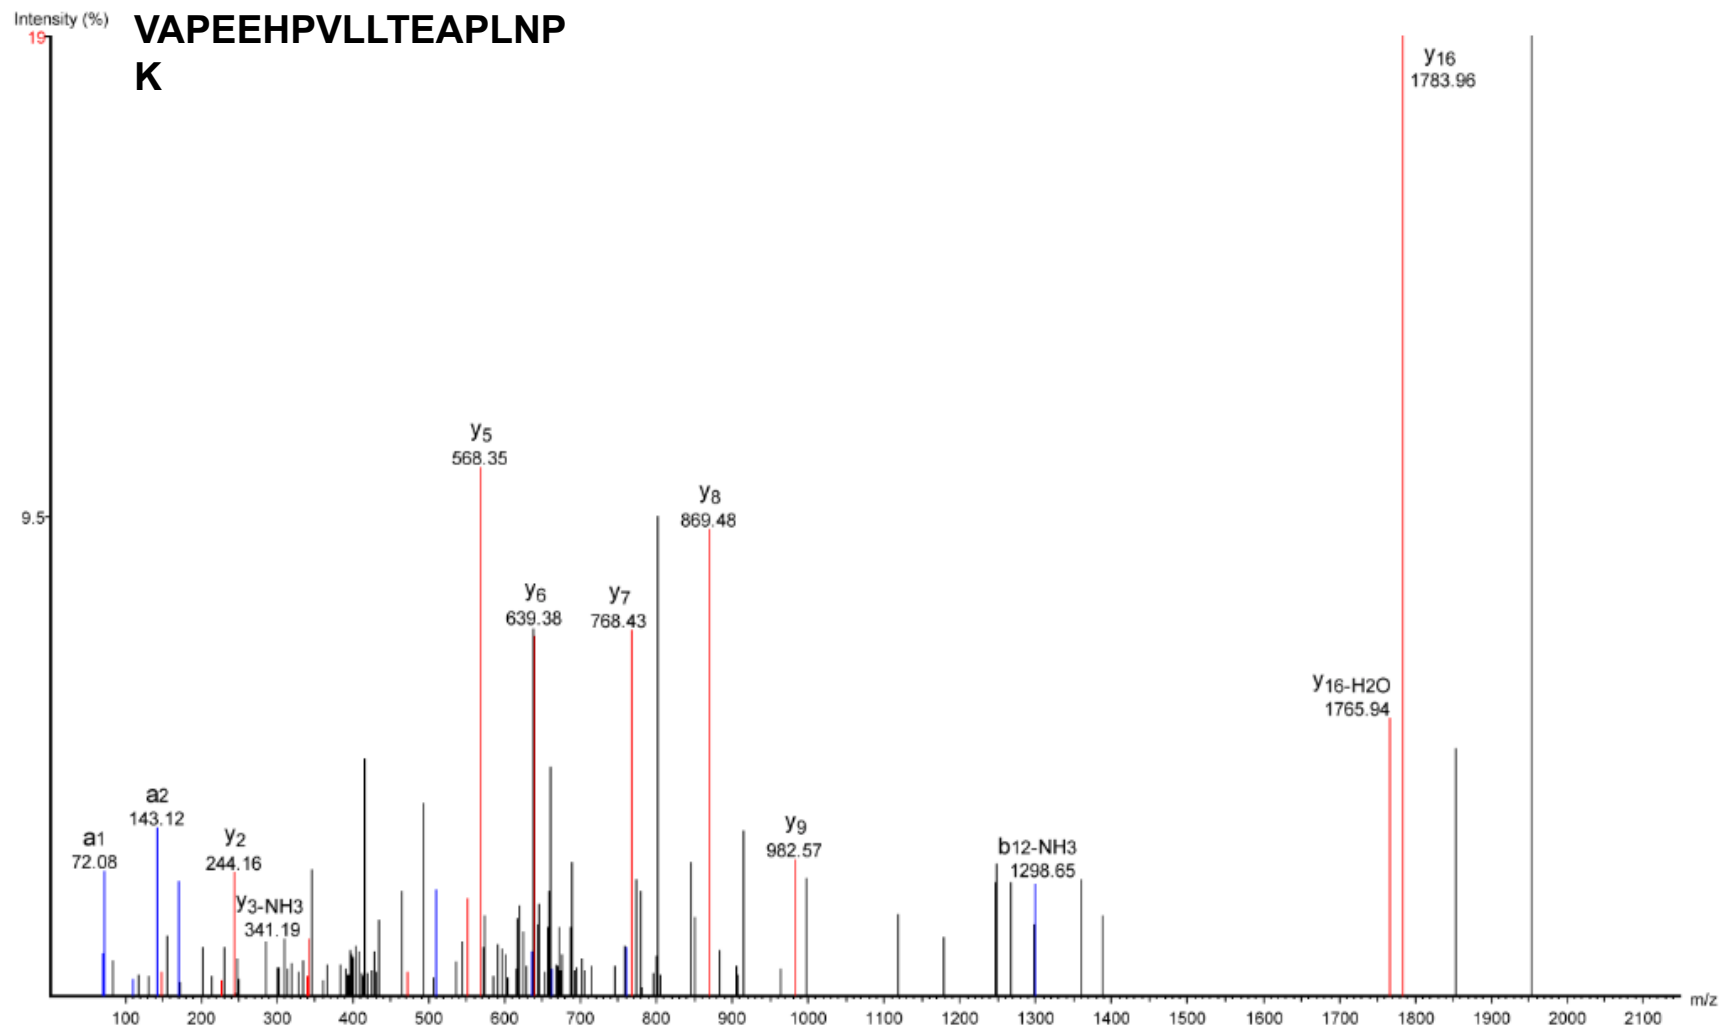

MS/MS spectrum of the peptide VAPEEHPVLLTEAPLNPK identified from actin (P60709). Deisotoped peptide ion m/z: 1954.06<sup>+1</sup>.

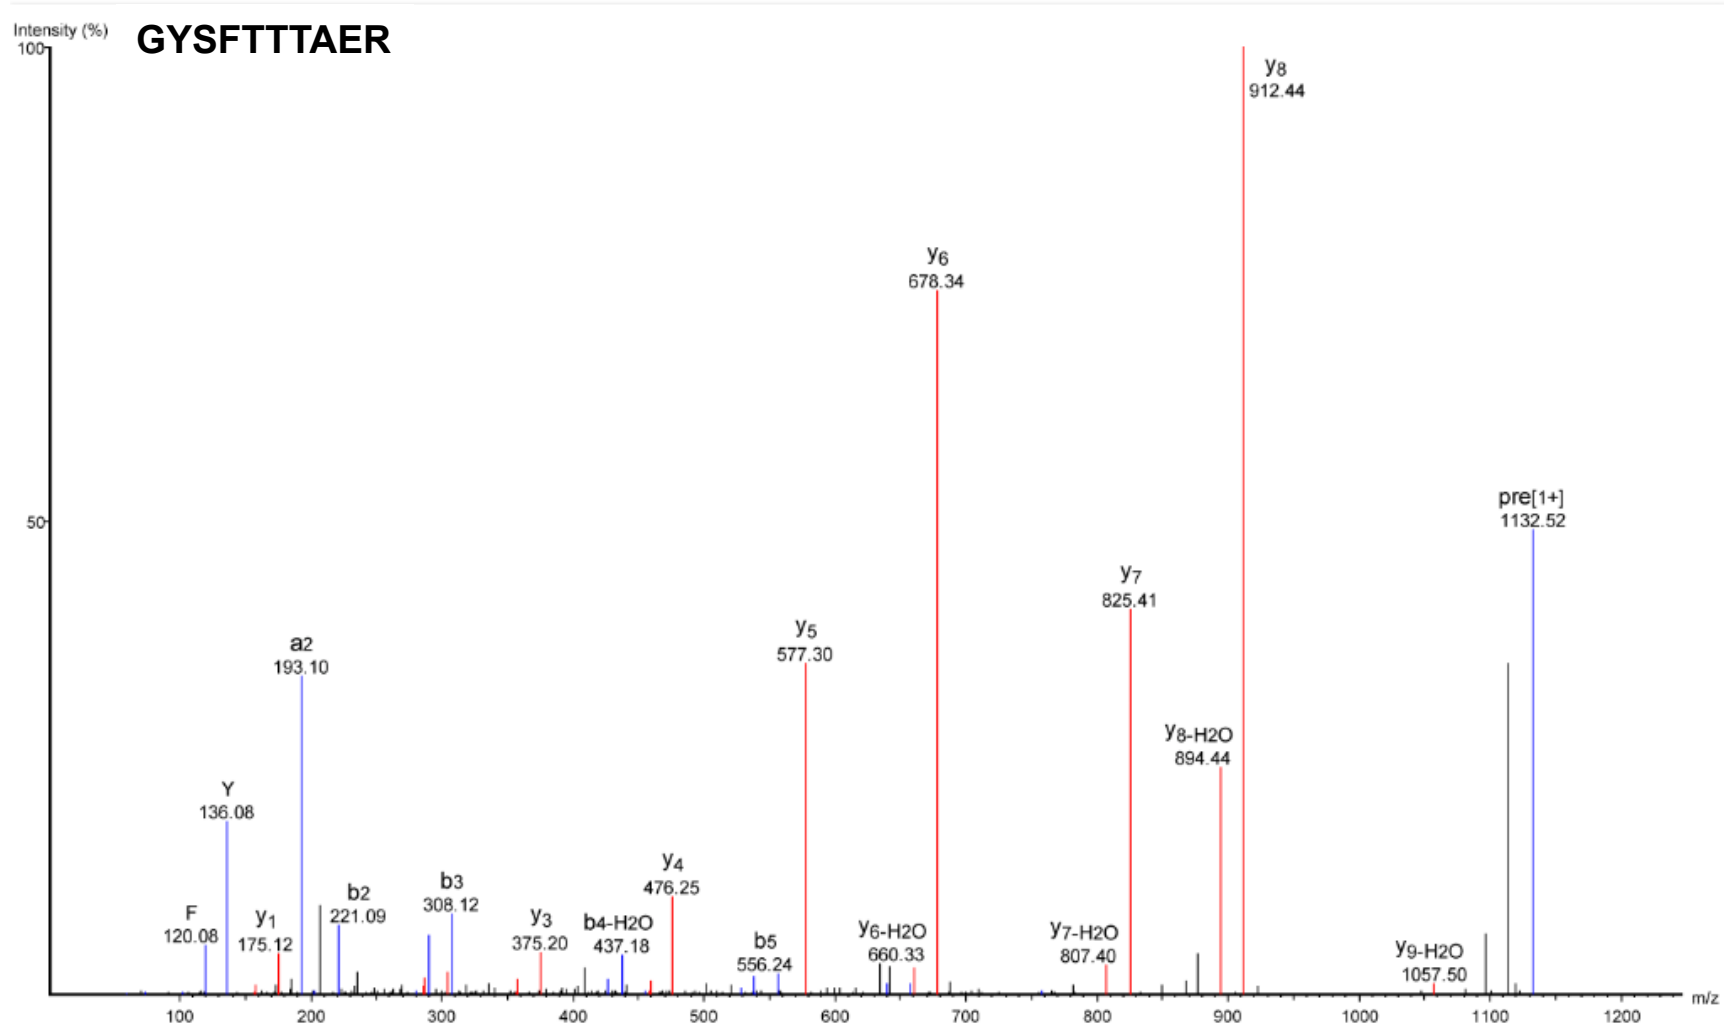

MS/MS spectrum of the peptide GYSFTTTAER identified from actin (P60709). Deisotoped peptide ion m/z: 1132.52<sup>+1</sup>.

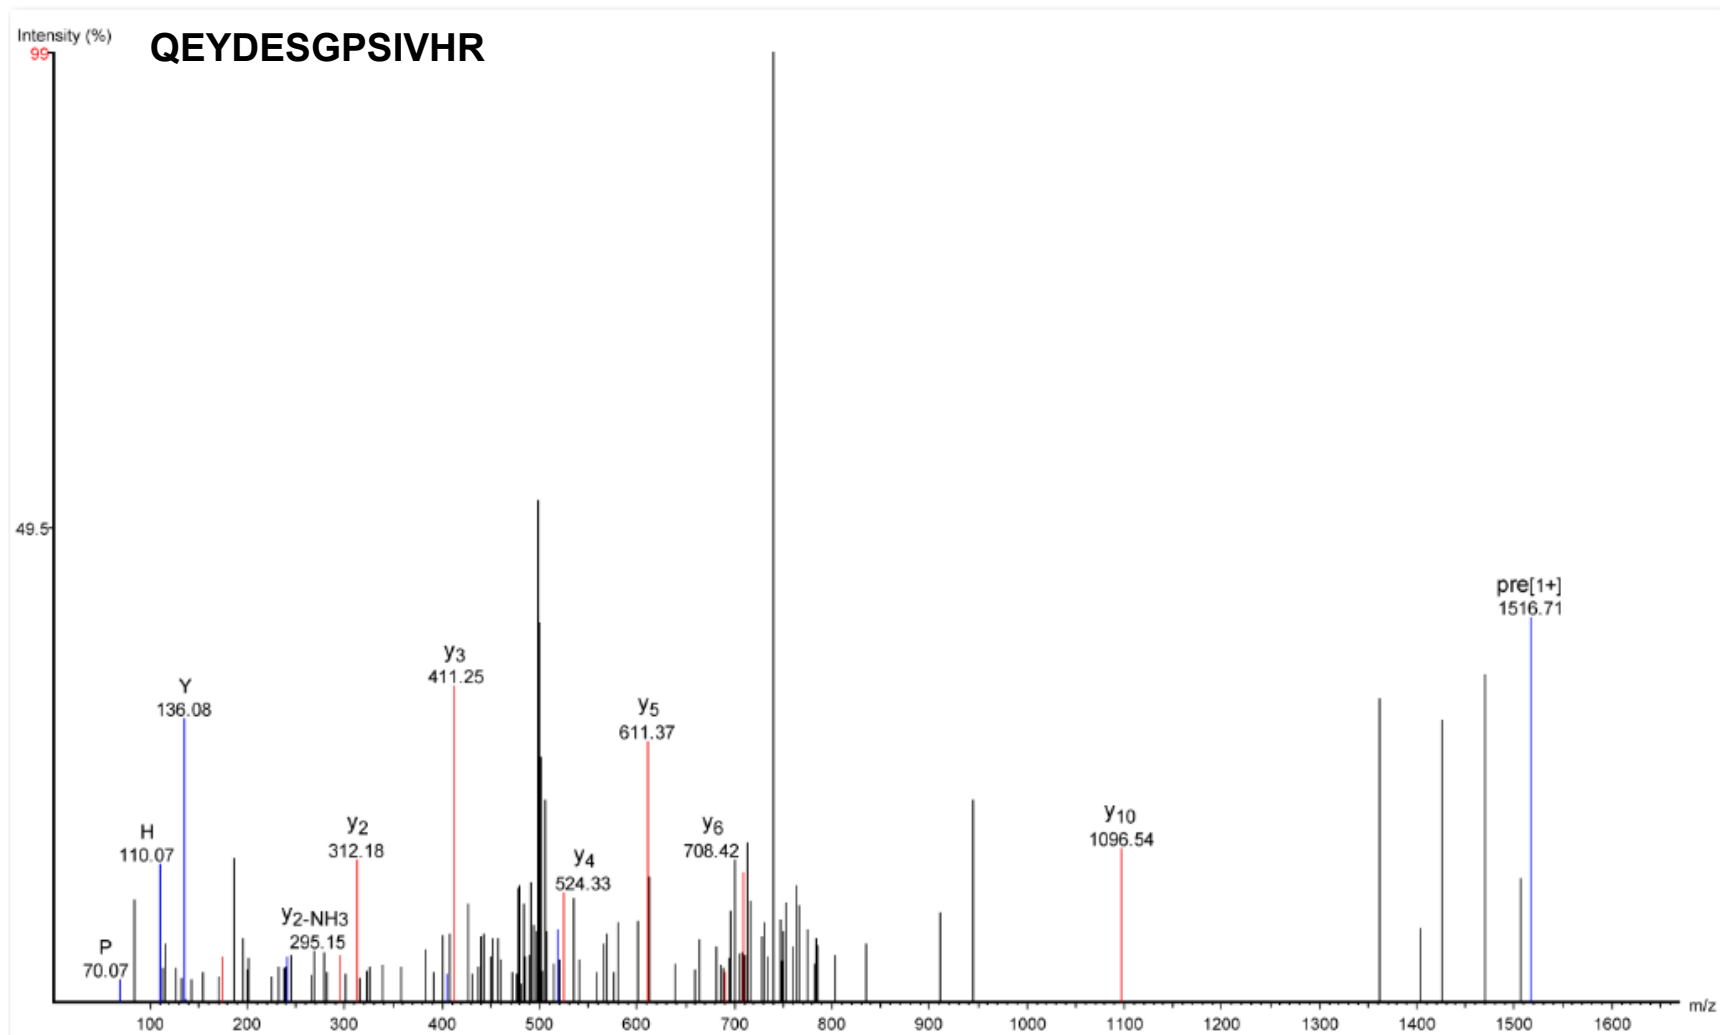

MS/MS spectrum of the peptide QEYDESGPSIVHR identified from actin (P60709). Deisotoped peptide ion  $m/z$ : 1516.71<sup>+1</sup>.

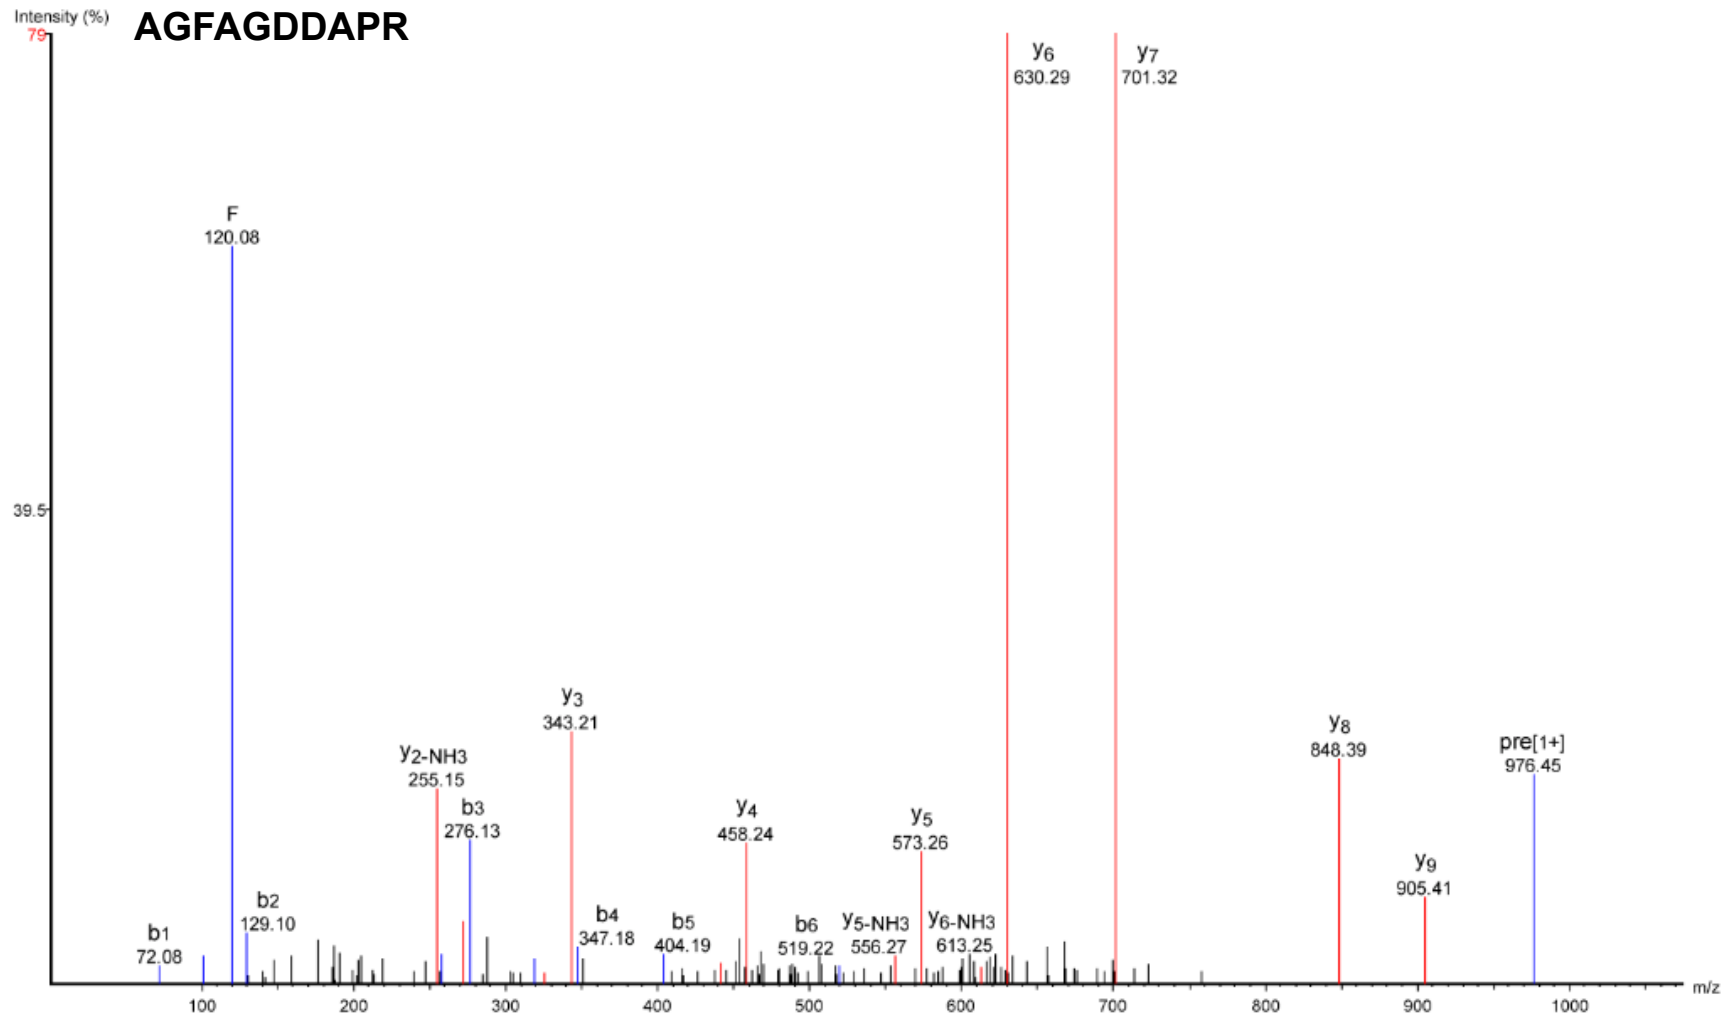

MS/MS spectrum of the peptide AGFAGDDAPR identified from actin (P60709). Deisotoped peptide ion m/z: 976.45<sup>+1</sup>.



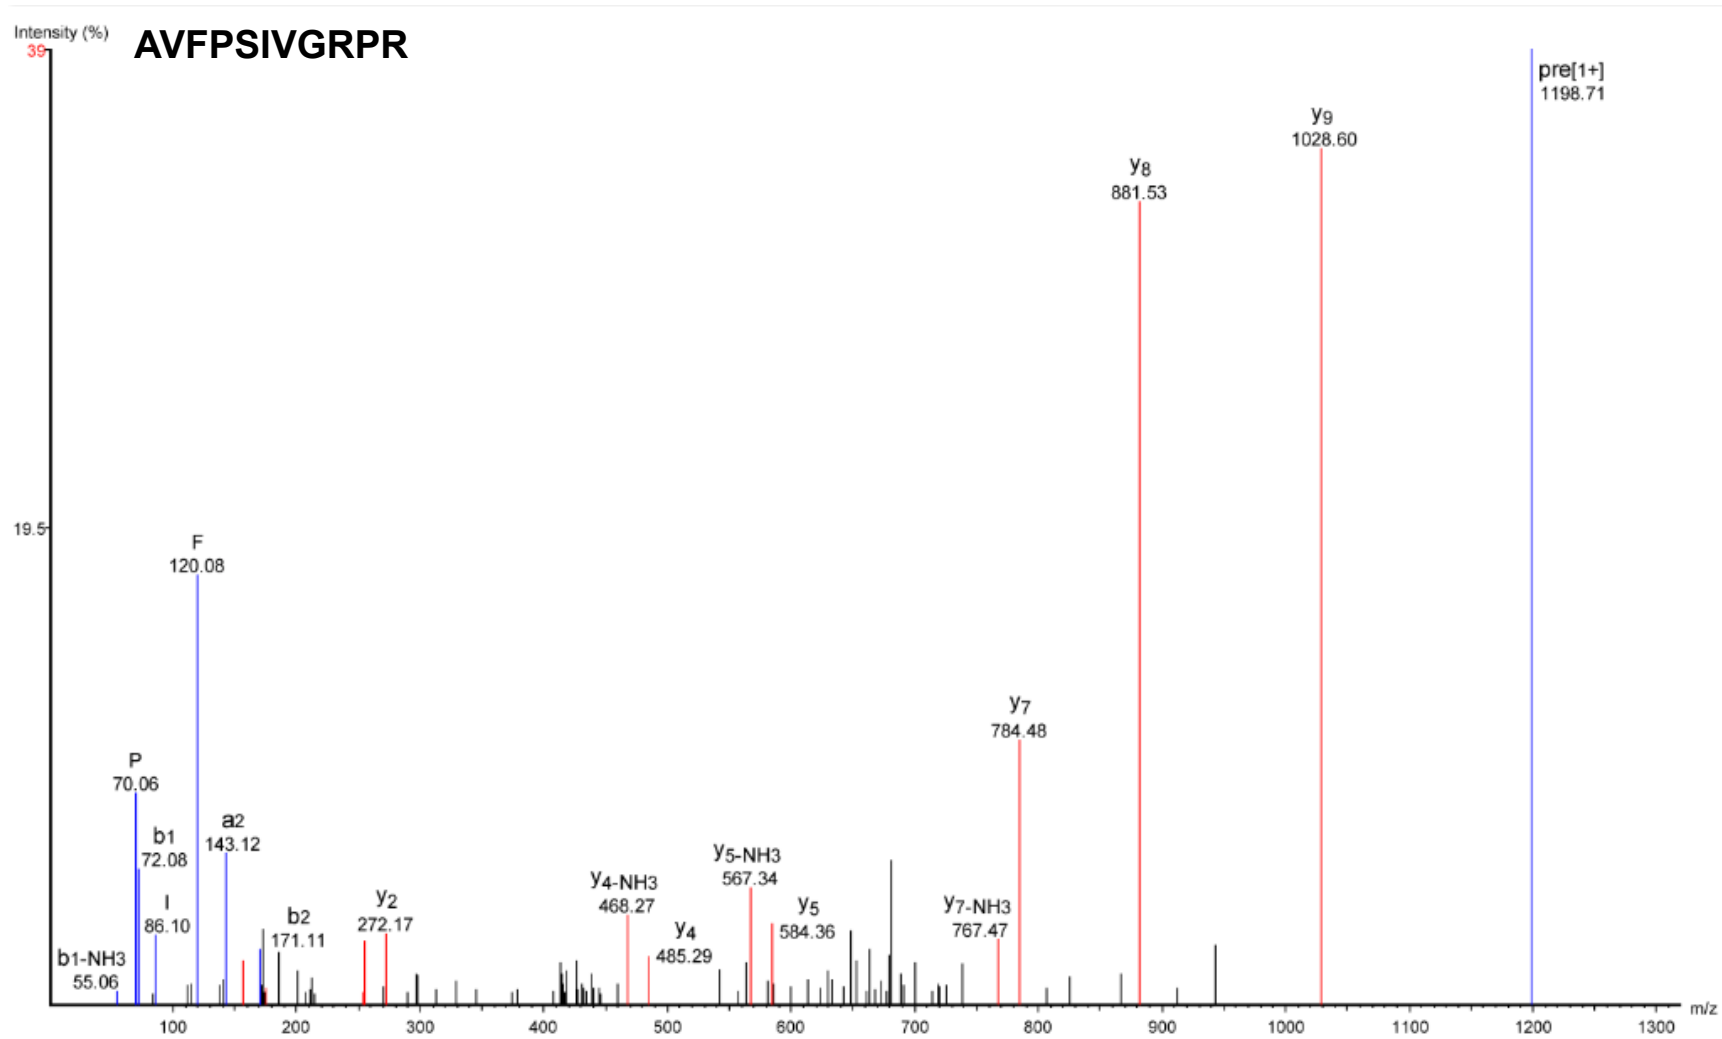

MS/MS spectrum of the peptide AVFPSIVGRPR identified from actin (P60709). Deisotoped peptide ion m/z: 1198.71<sup>+1</sup>.

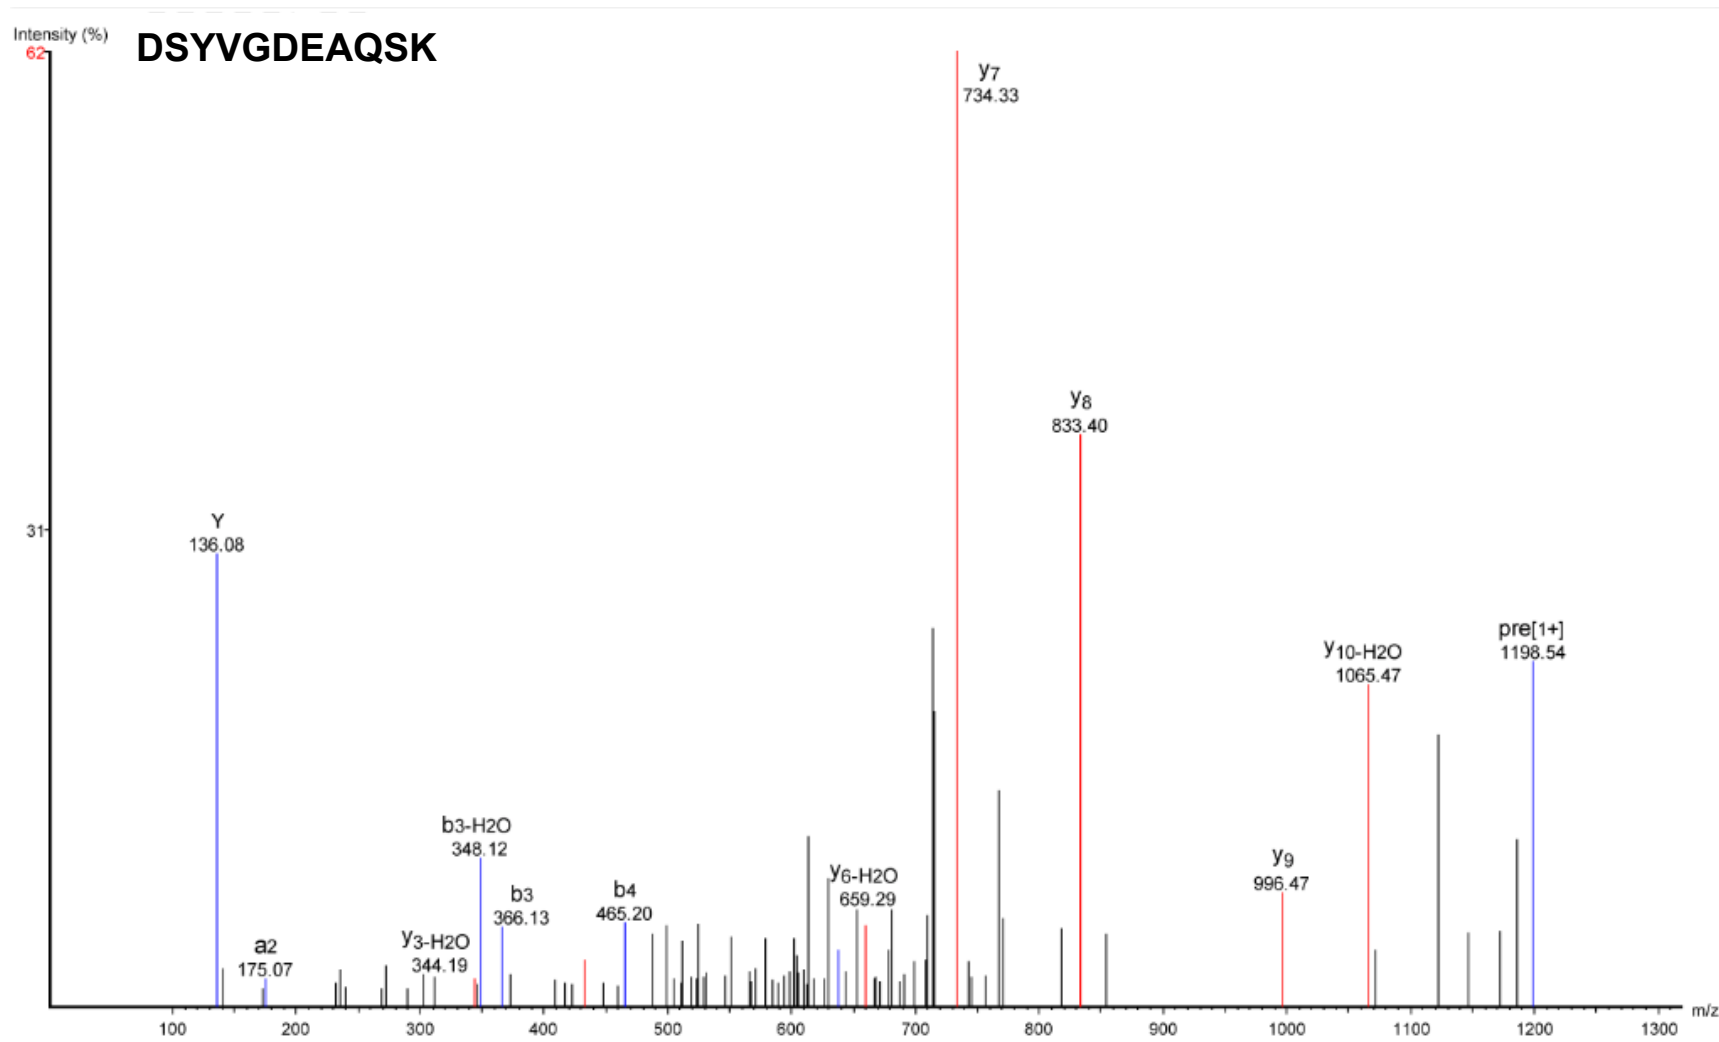

MS/MS spectrum of the peptide DSYVGDEAQS K identified from actin (P60709). Deisotoped peptide ion m/z: 1198.54<sup>+1</sup>.

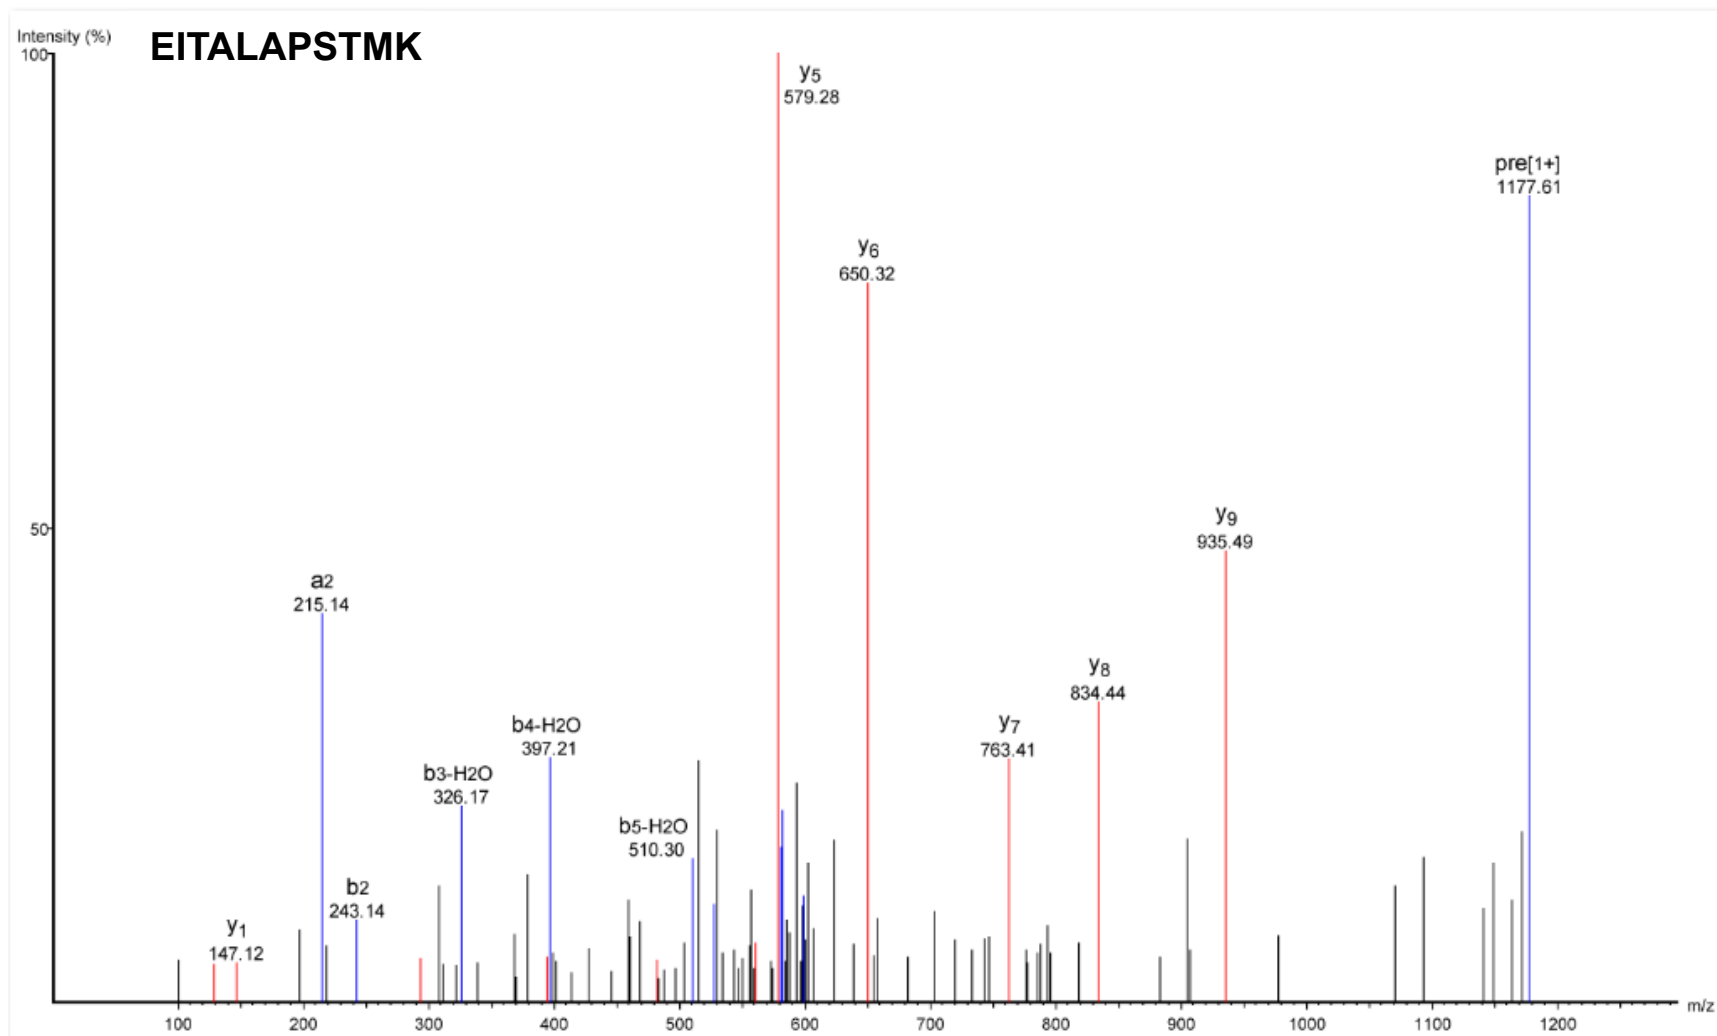

MS/MS spectrum of the peptide EITALAPSTMK identified from actin (P60709). Deisotoped peptide ion m/z: 1177.61<sup>+1</sup>.

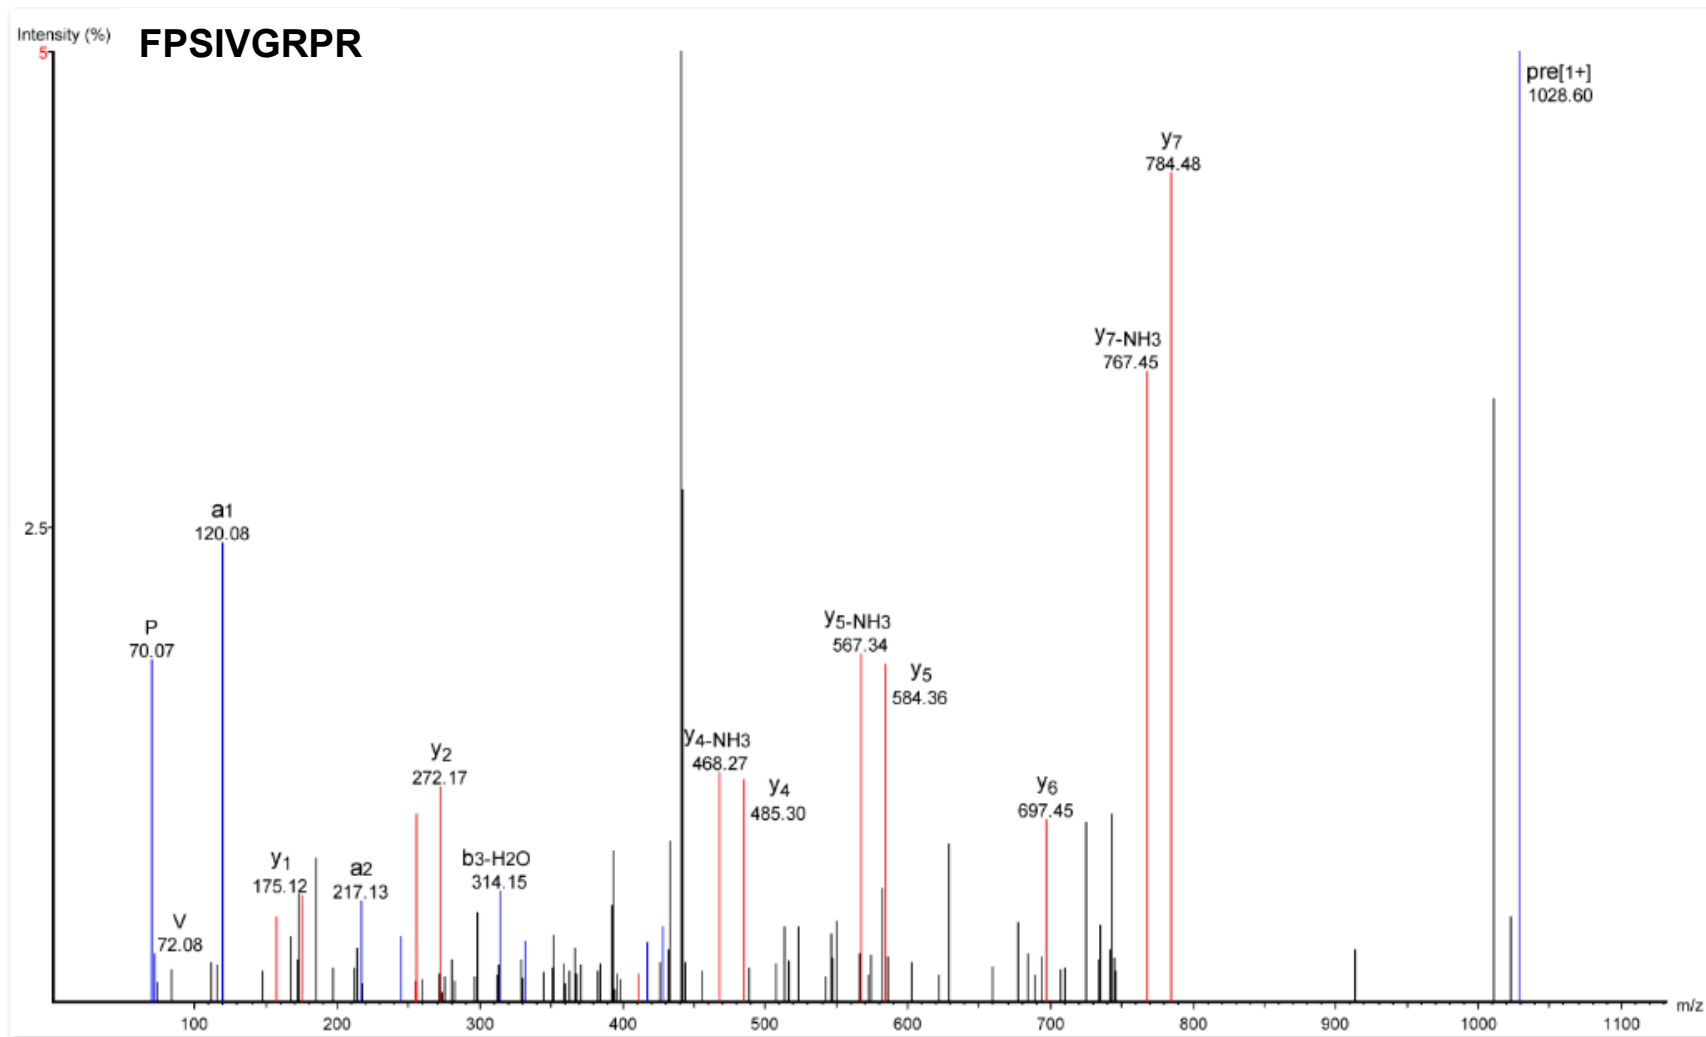

MS/MS spectrum of the peptide FPSIVGRPR identified from actin (P60709). Deisotoped peptide ion m/z: 1028.60<sup>+1</sup>.

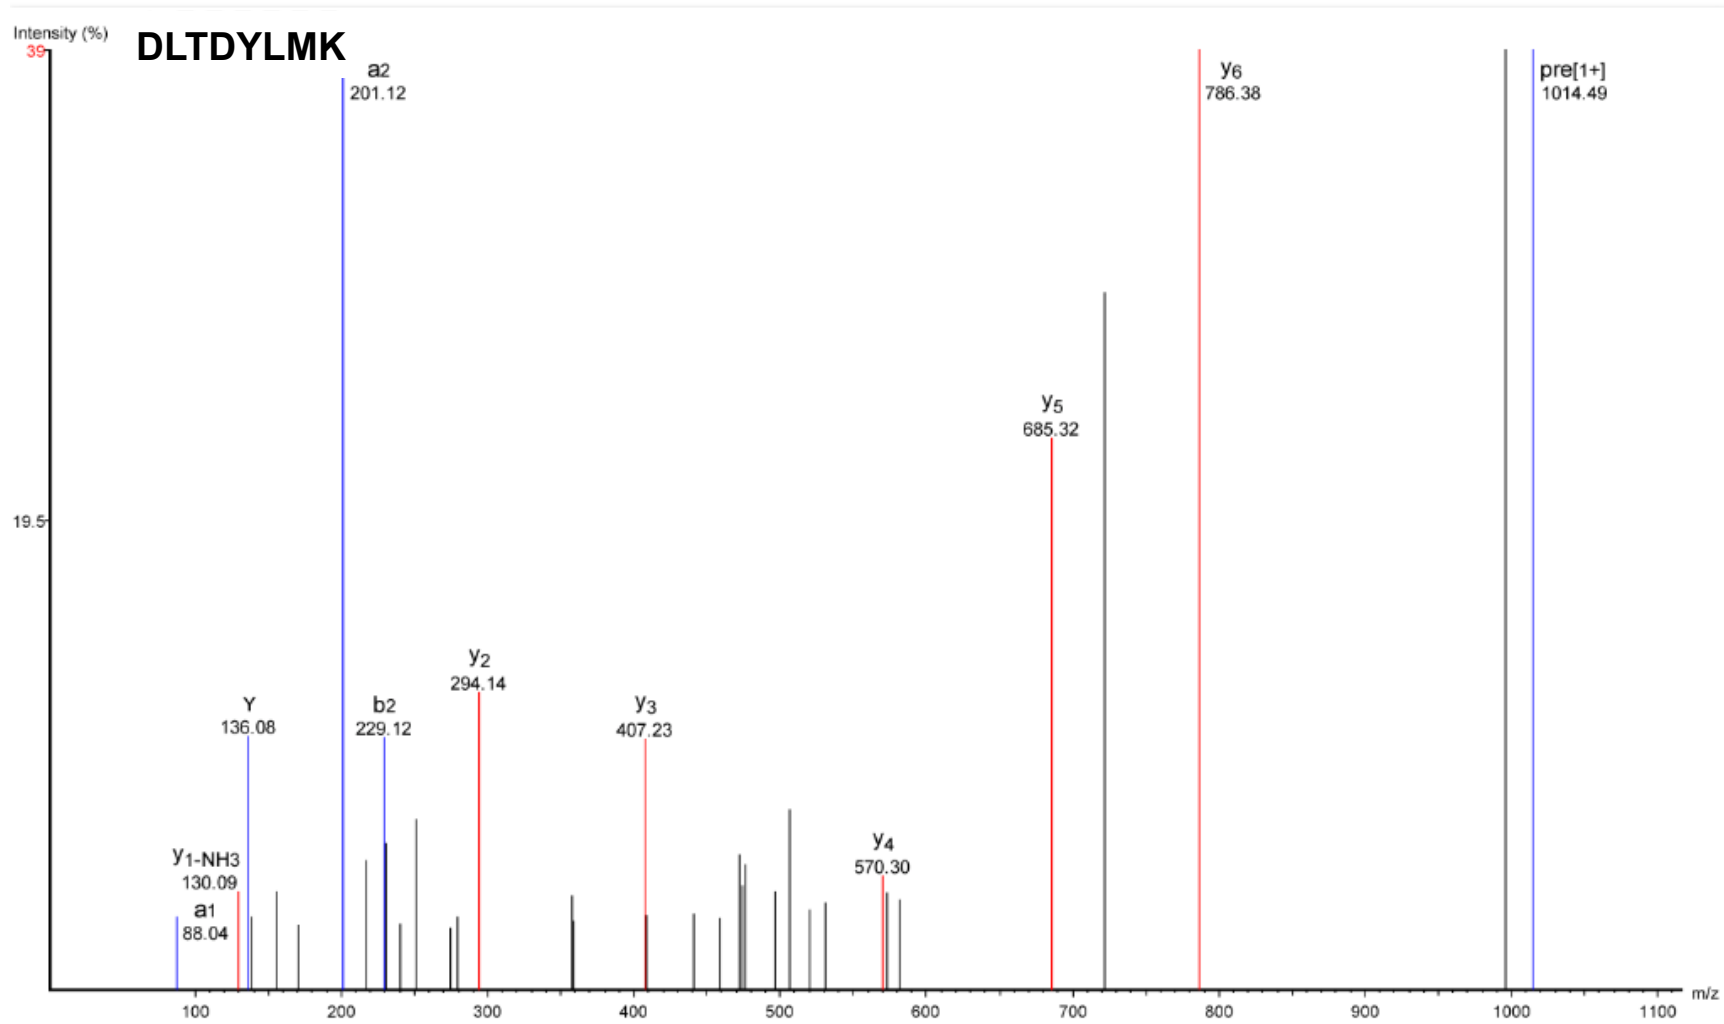

MS/MS spectrum of the peptide DLTDYLMK identified from actin (P60709). Deisotoped peptide ion m/z: 1014.49<sup>+1</sup>.

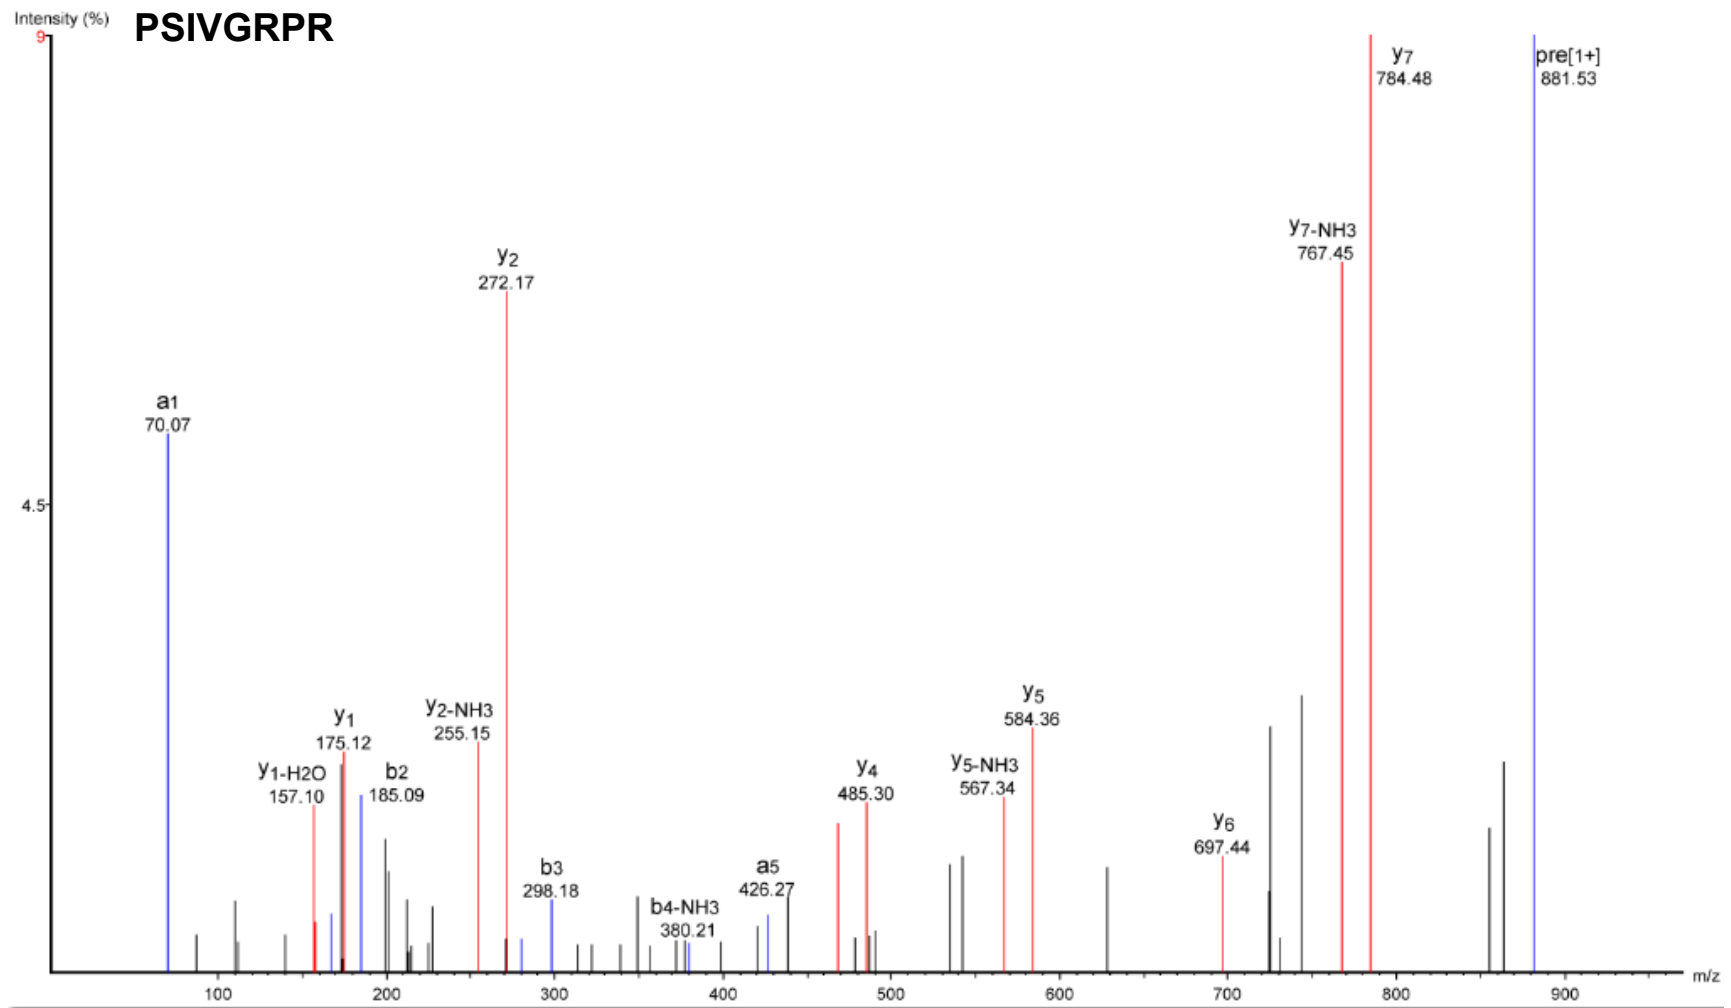

MS/MS spectrum of the peptide PSIVGRPR identified from actin (P60709). Deisotoped peptide ion m/z: 881.53<sup>+1</sup>.

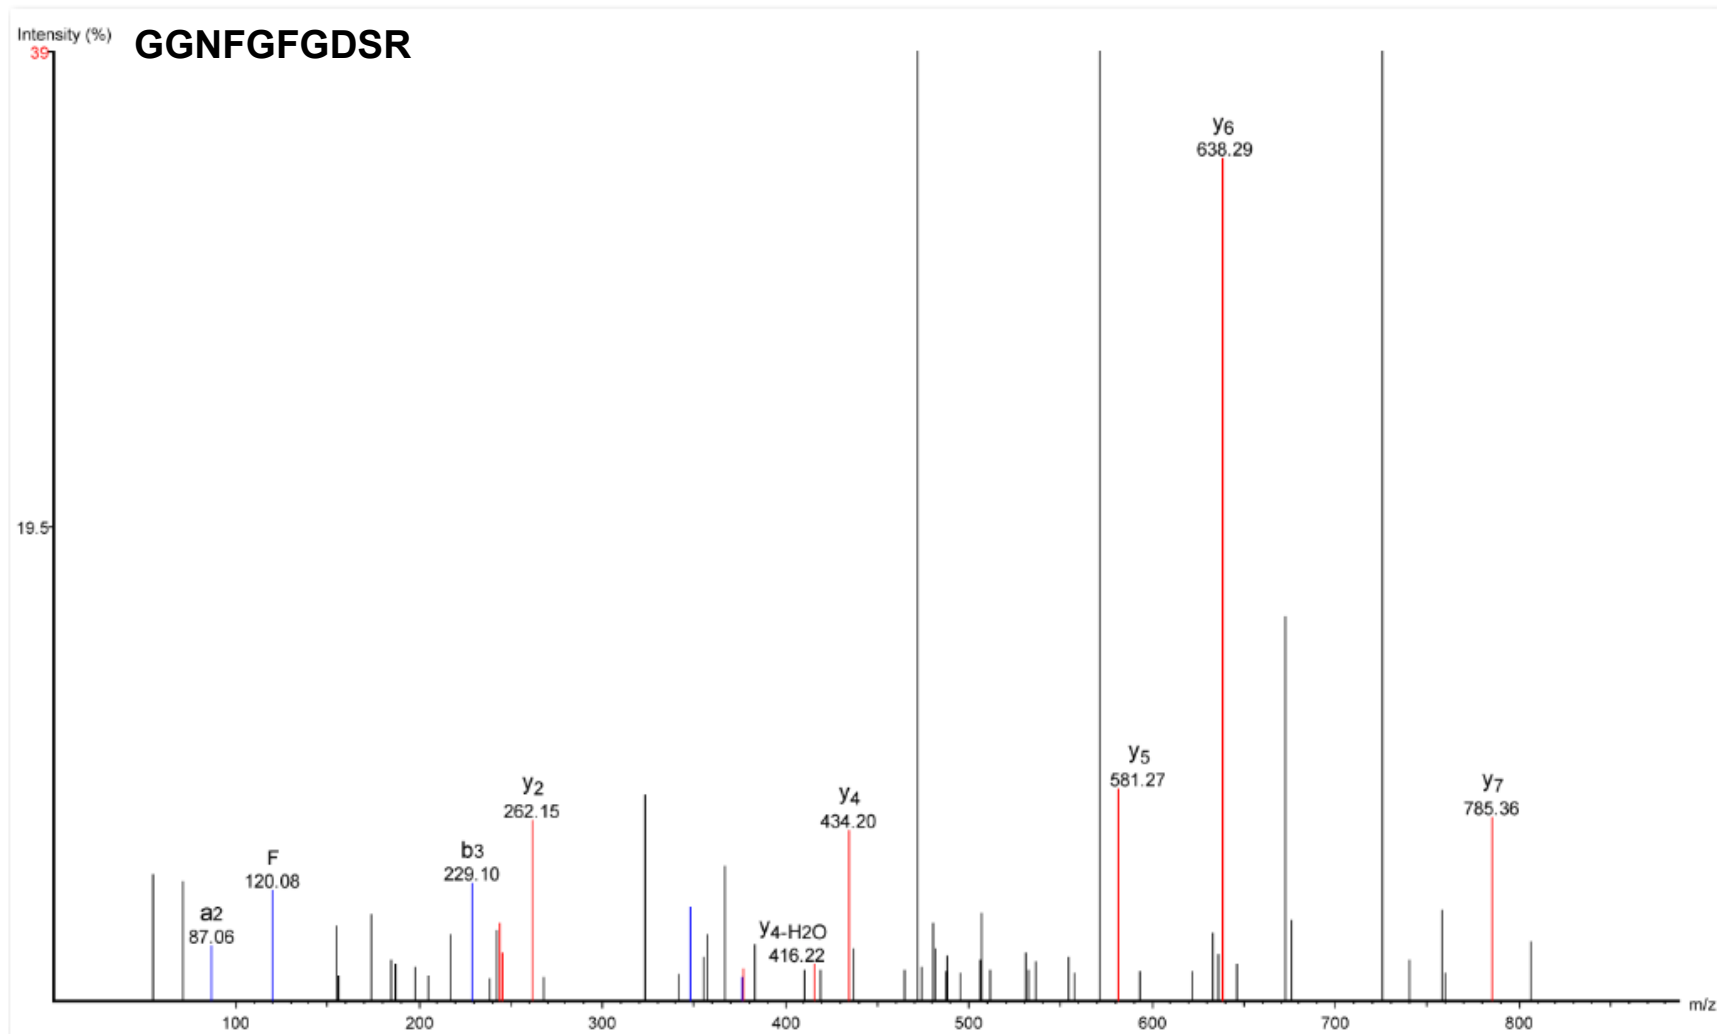

MS/MS spectrum of the peptide GGNFGFGDSR identified from heterogeneous nuclear ribonucleoprotein (P22626). Deisotoped peptide ion m/z: 1013.44<sup>+1</sup>

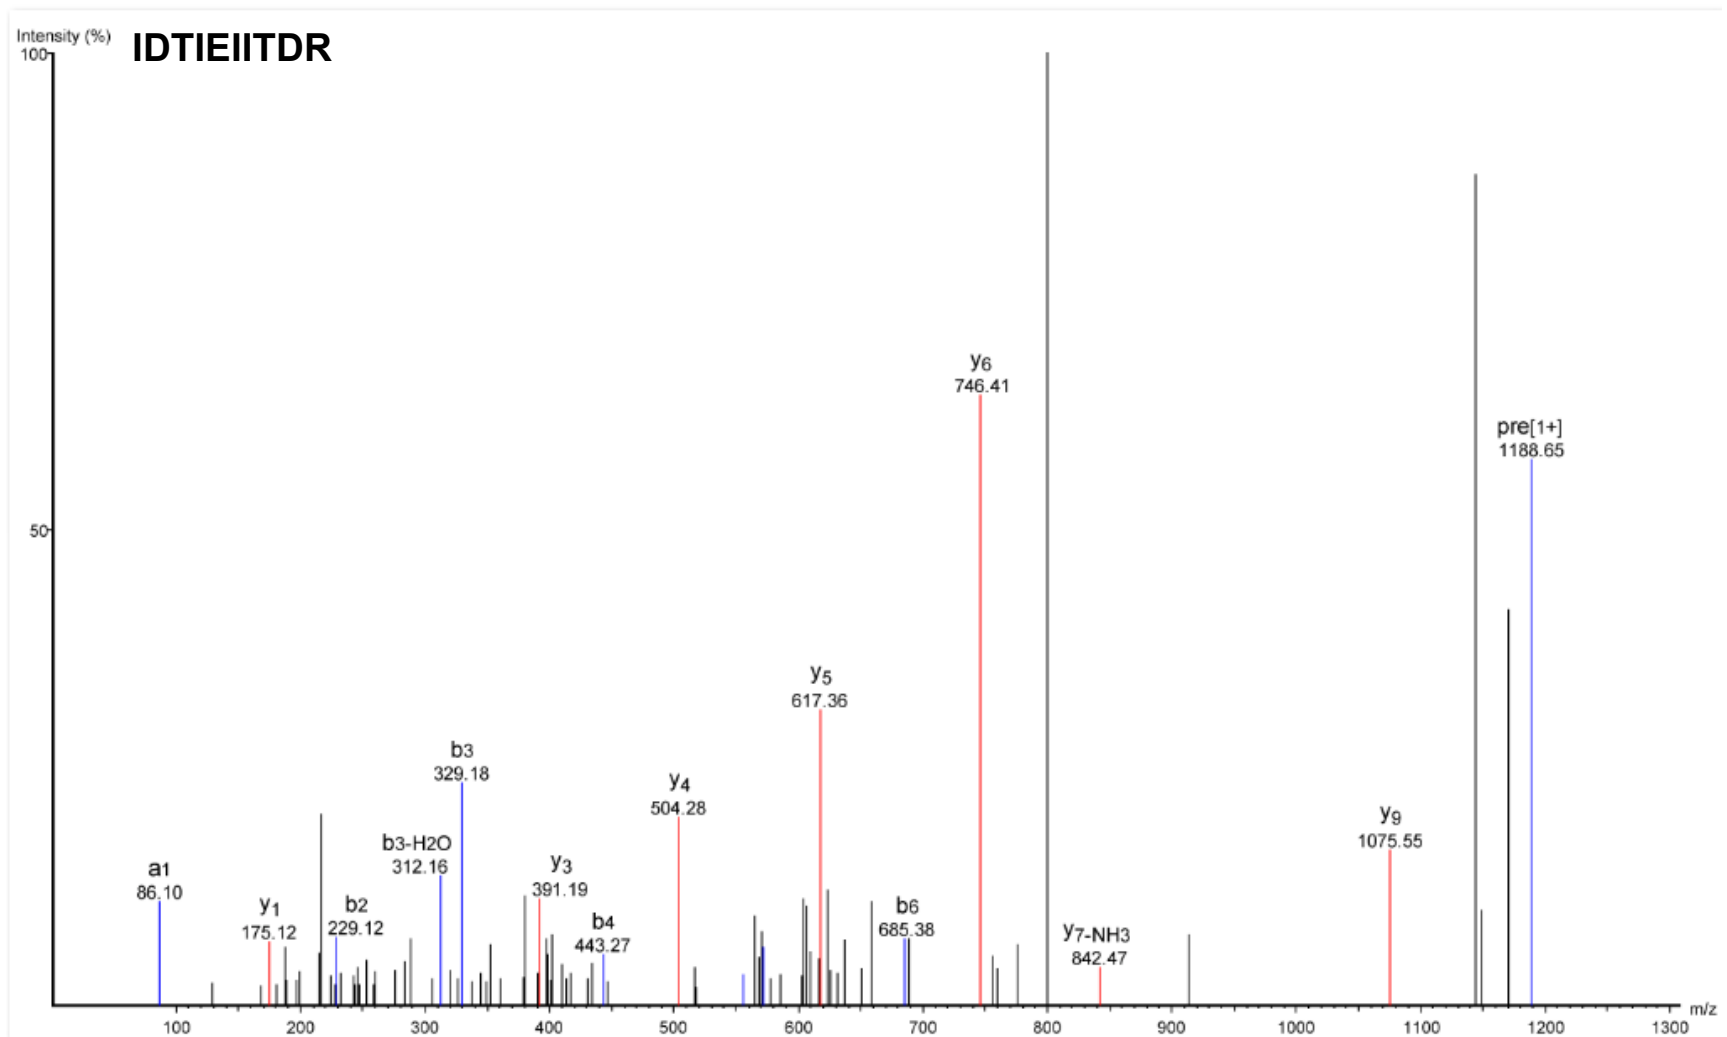

MS/MS spectrum of the peptide IDTIEIITDR identified from heterogeneous nuclear ribonucleoprotein (P22626). Deisotoped peptide ion m/z: 1188.65<sup>+1</sup>.



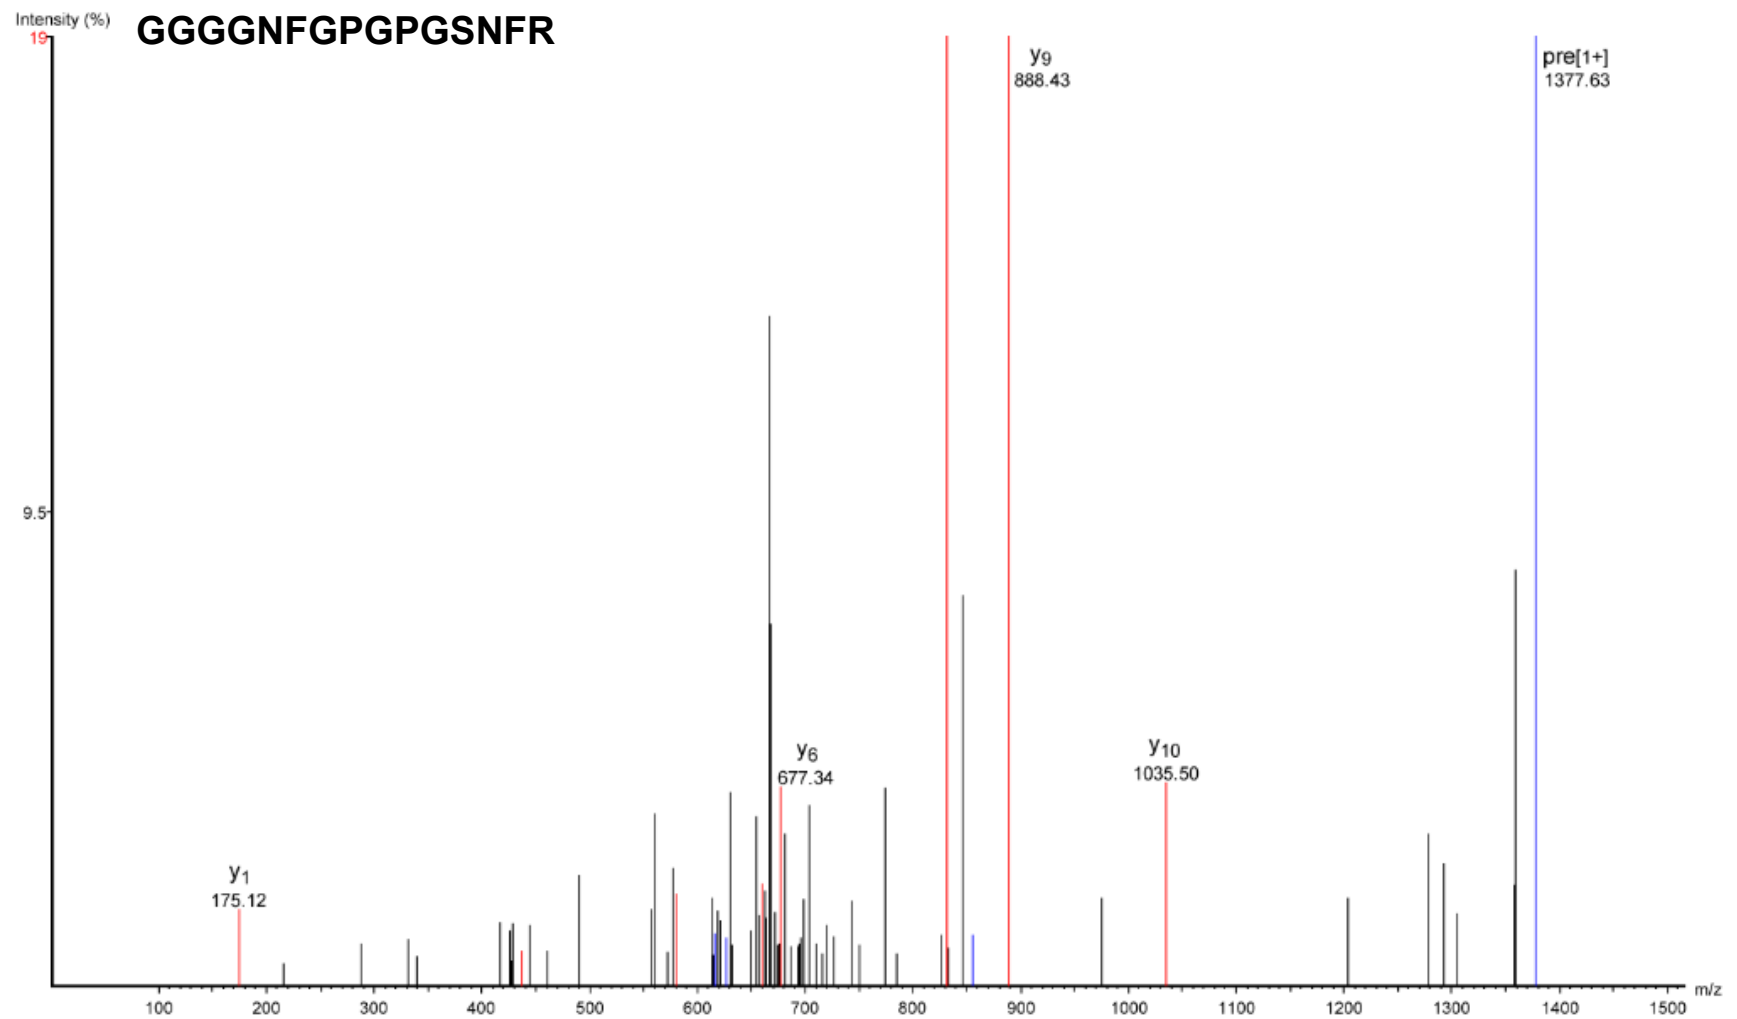

MS/MS spectrum of the peptide GGGNFGPGGSNFR identified from heterogeneous nuclear ribonucleoprotein (P22626). Deisotoped peptide ion  $m/z$ : 1377.63<sup>+1</sup>.

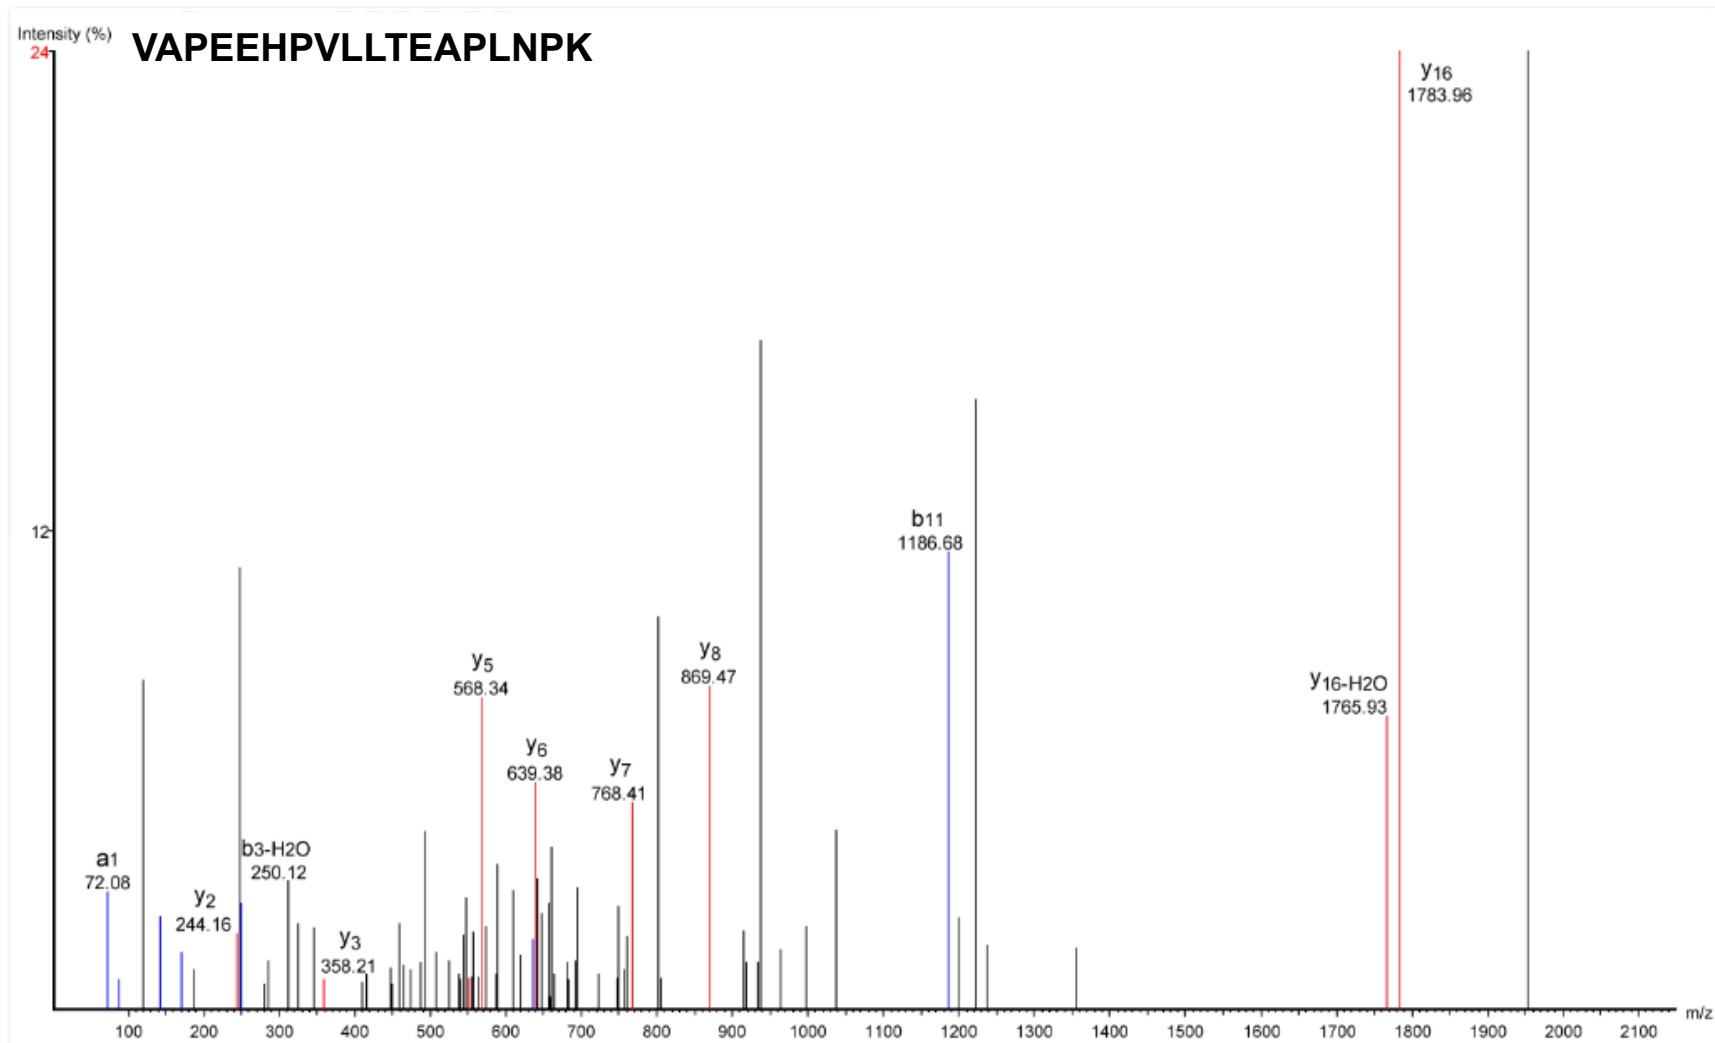

MS/MS spectrum of the peptide VAPEEHPVLLTEAPLNPK identified from actin (P63261). Deisotoped peptide ion  $m/z$ : 1954.06<sup>+1</sup>.

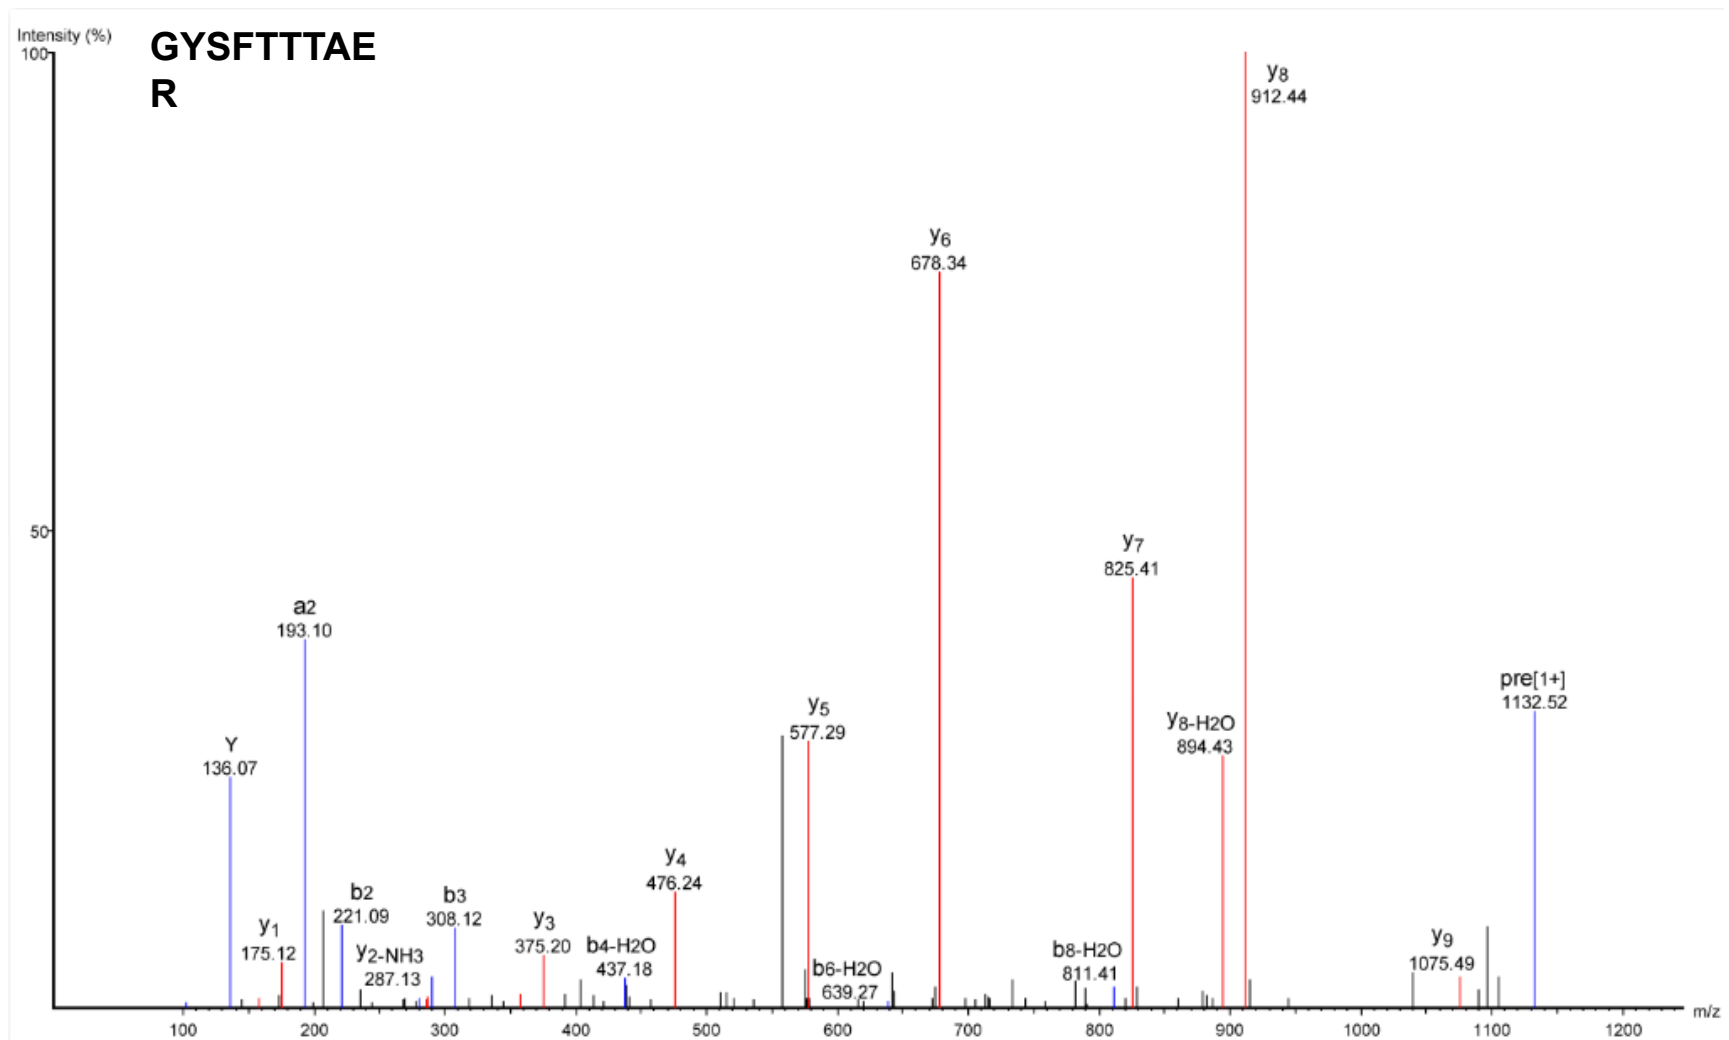

MS/MS spectrum of the peptide GYSFTTTAER identified from actin (P63261). Deisotoped peptide ion m/z: 1132.52<sup>+1</sup>.

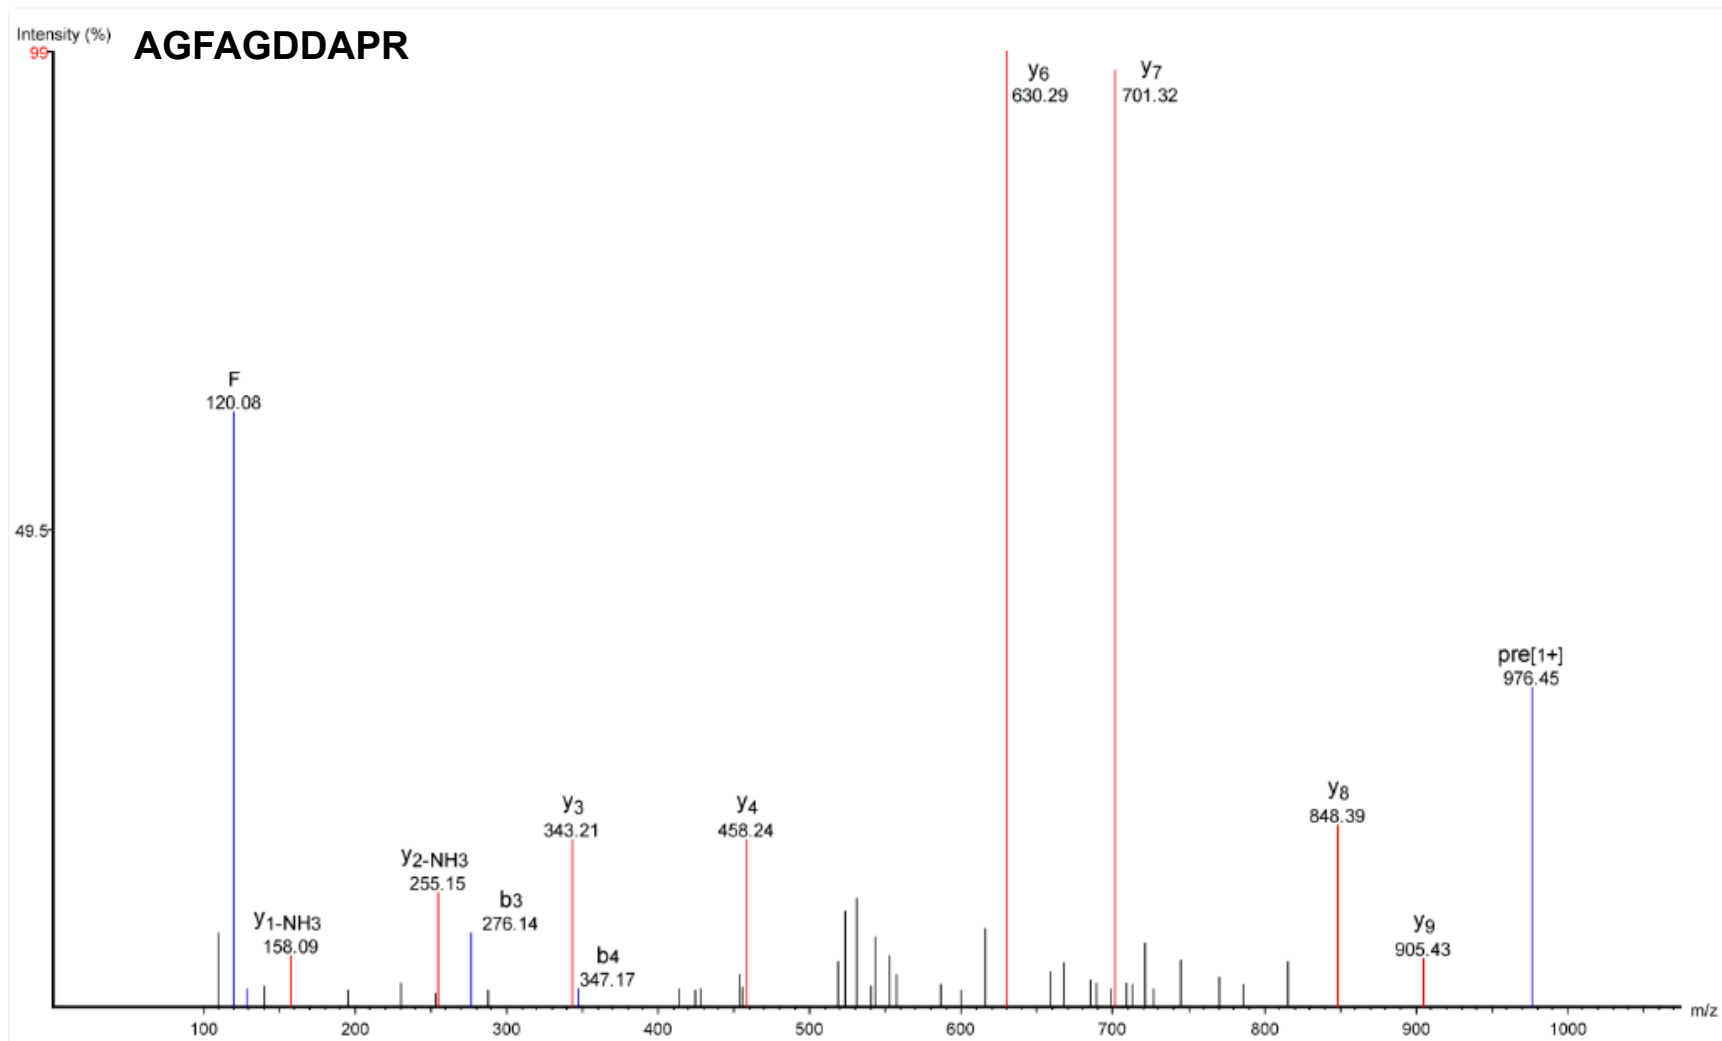

MS/MS spectrum of the peptide AGFAGDDAPR identified from actin (P63261). Deisotoped peptide ion m/z: 976.45<sup>+1</sup>.

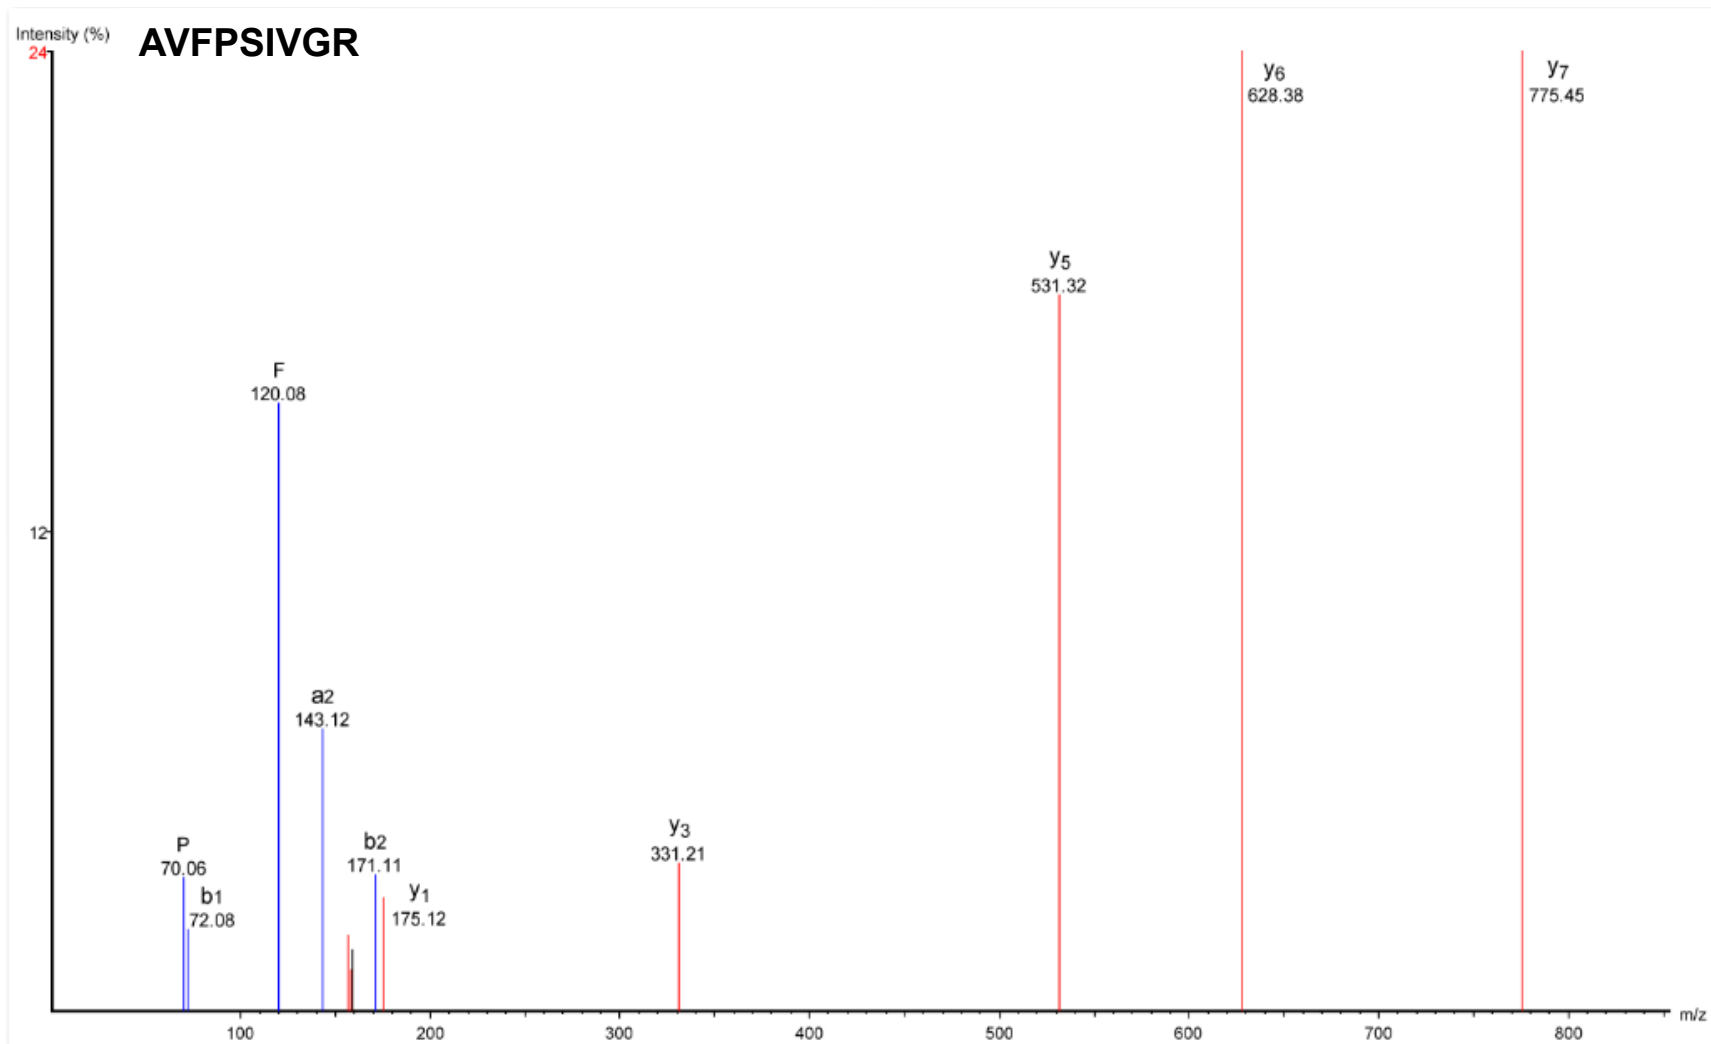

MS/MS spectrum of the peptide AVFPSIVGR identified from actin (P63261). Deisotoped peptide ion m/z: 945.55<sup>+1</sup>.

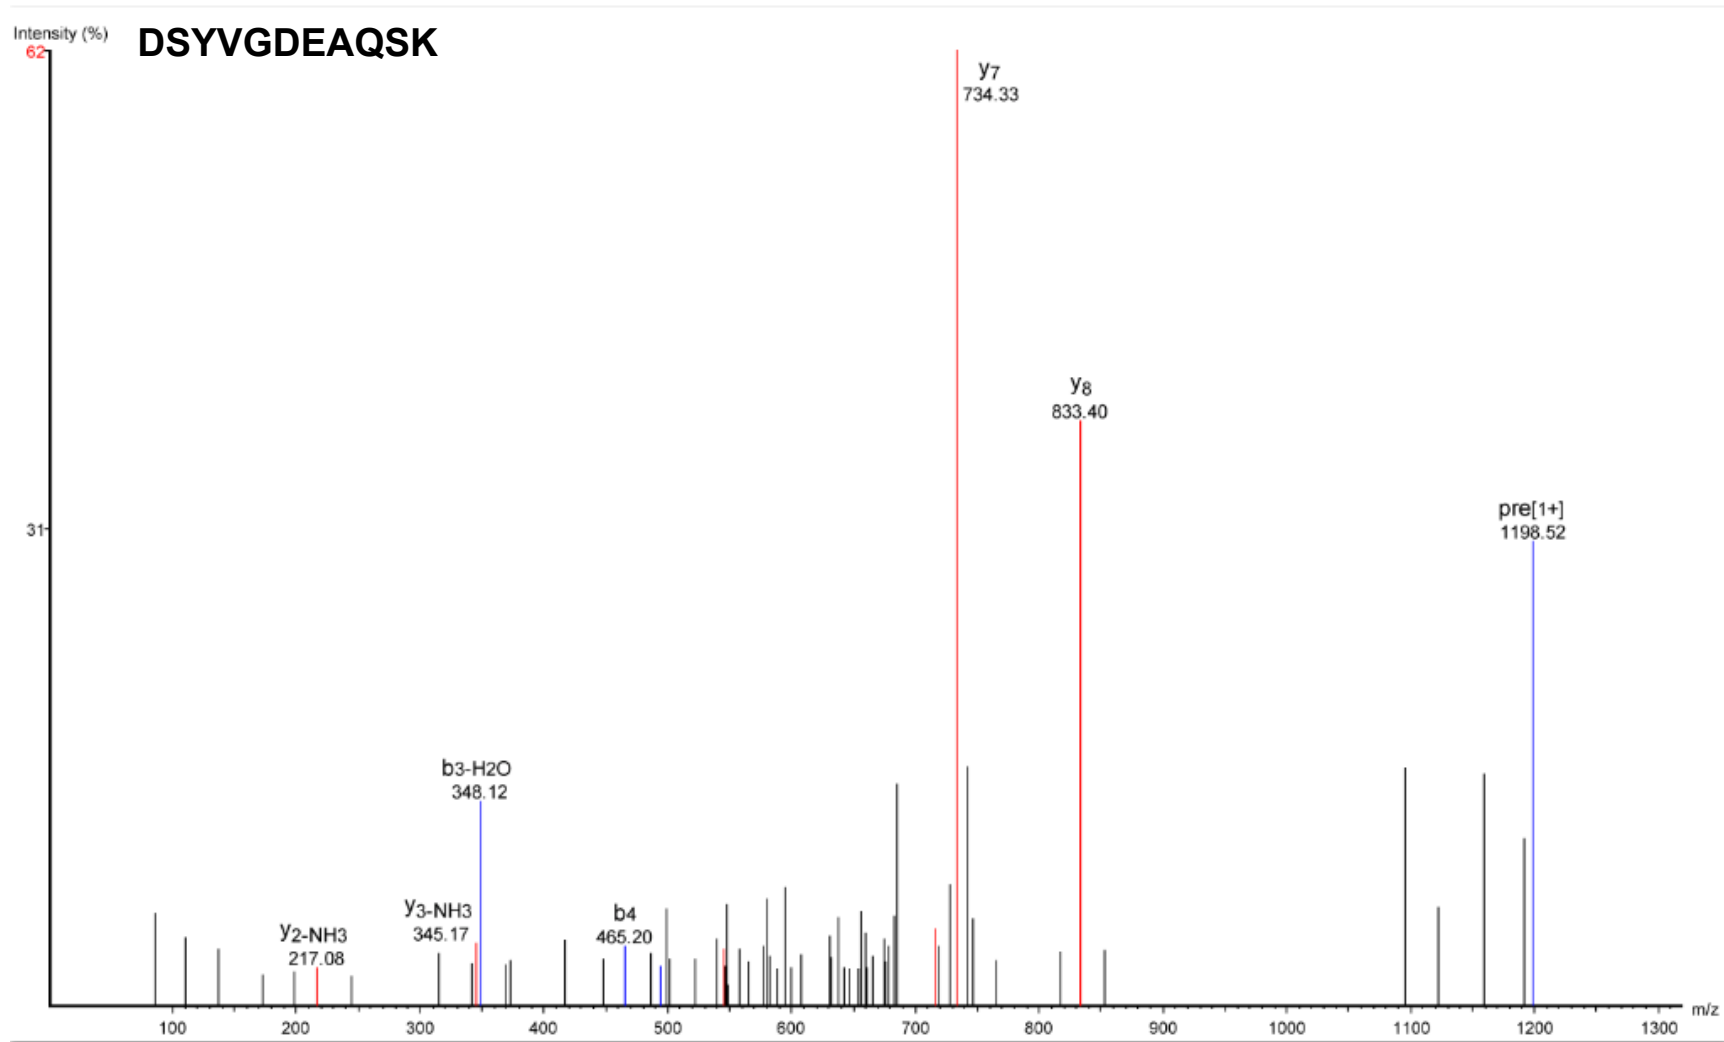

MS/MS spectrum of the peptide DSYVGDEAQS K identified from actin (P63261). Deisotoped peptide ion m/z: 1198.52<sup>+1</sup>.

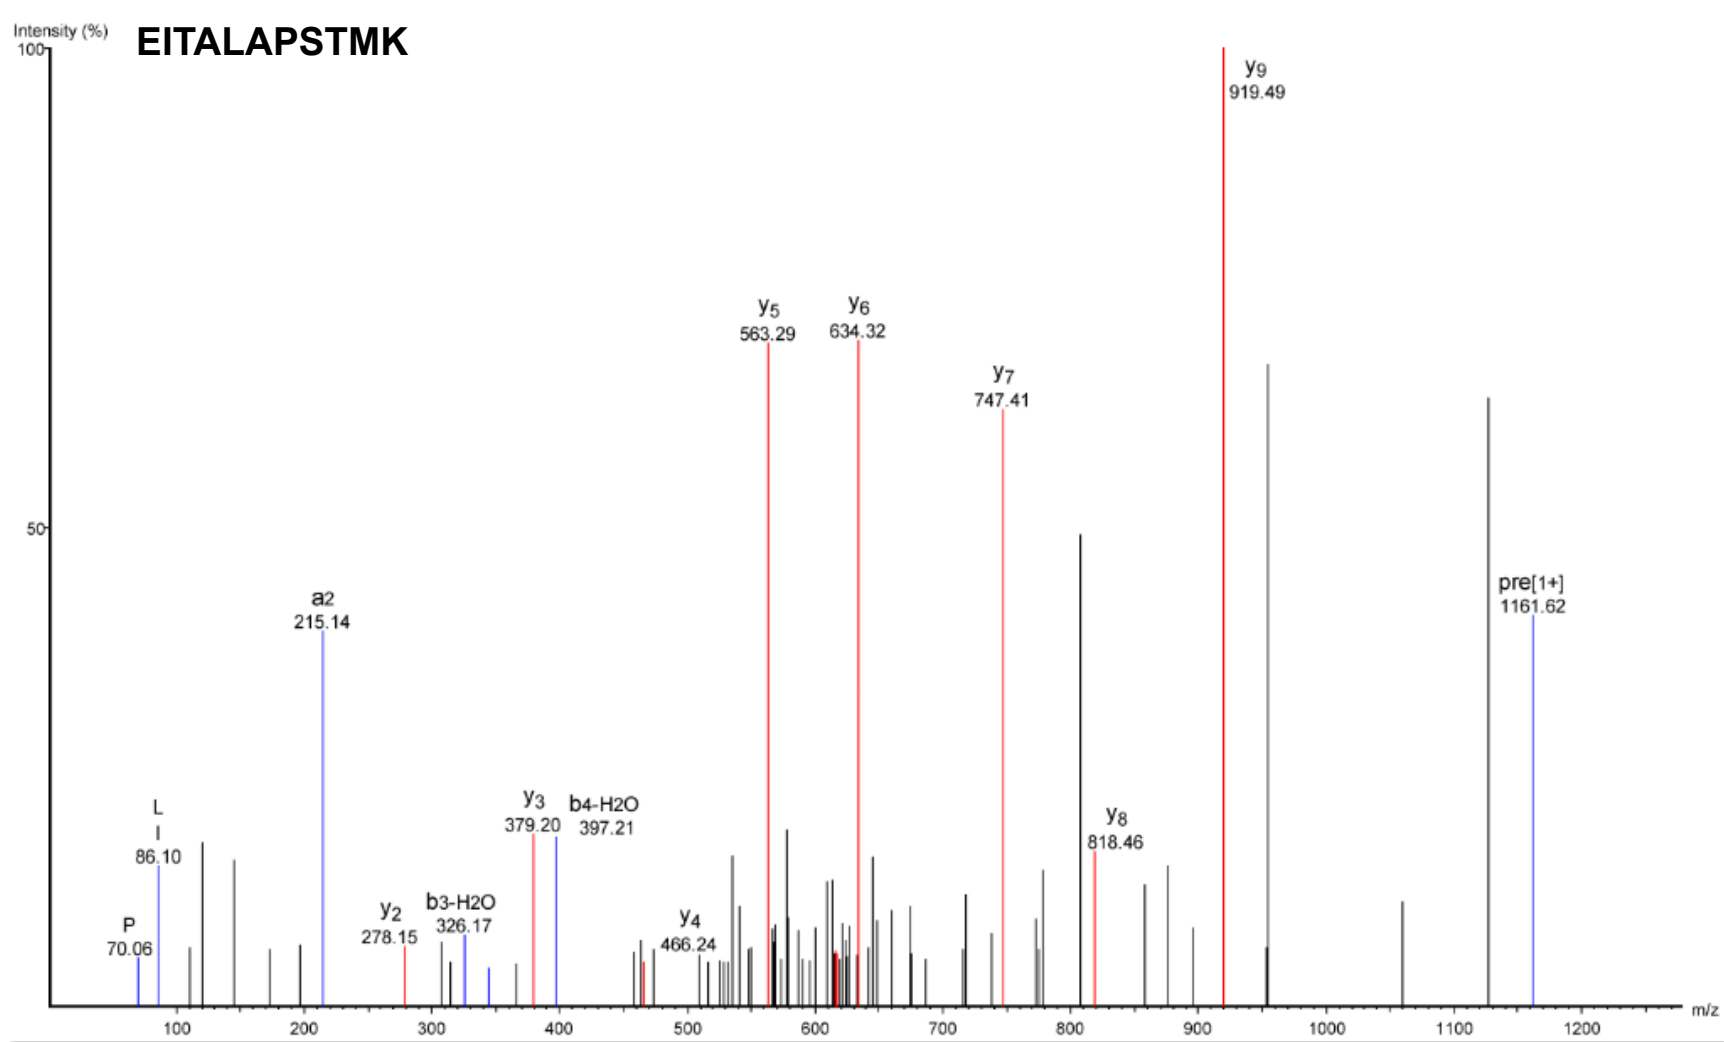

MS/MS spectrum of the peptide EITALAPSTMK identified from actin (P63261). Deisotoped peptide ion m/z: 1161.62<sup>+1</sup>.

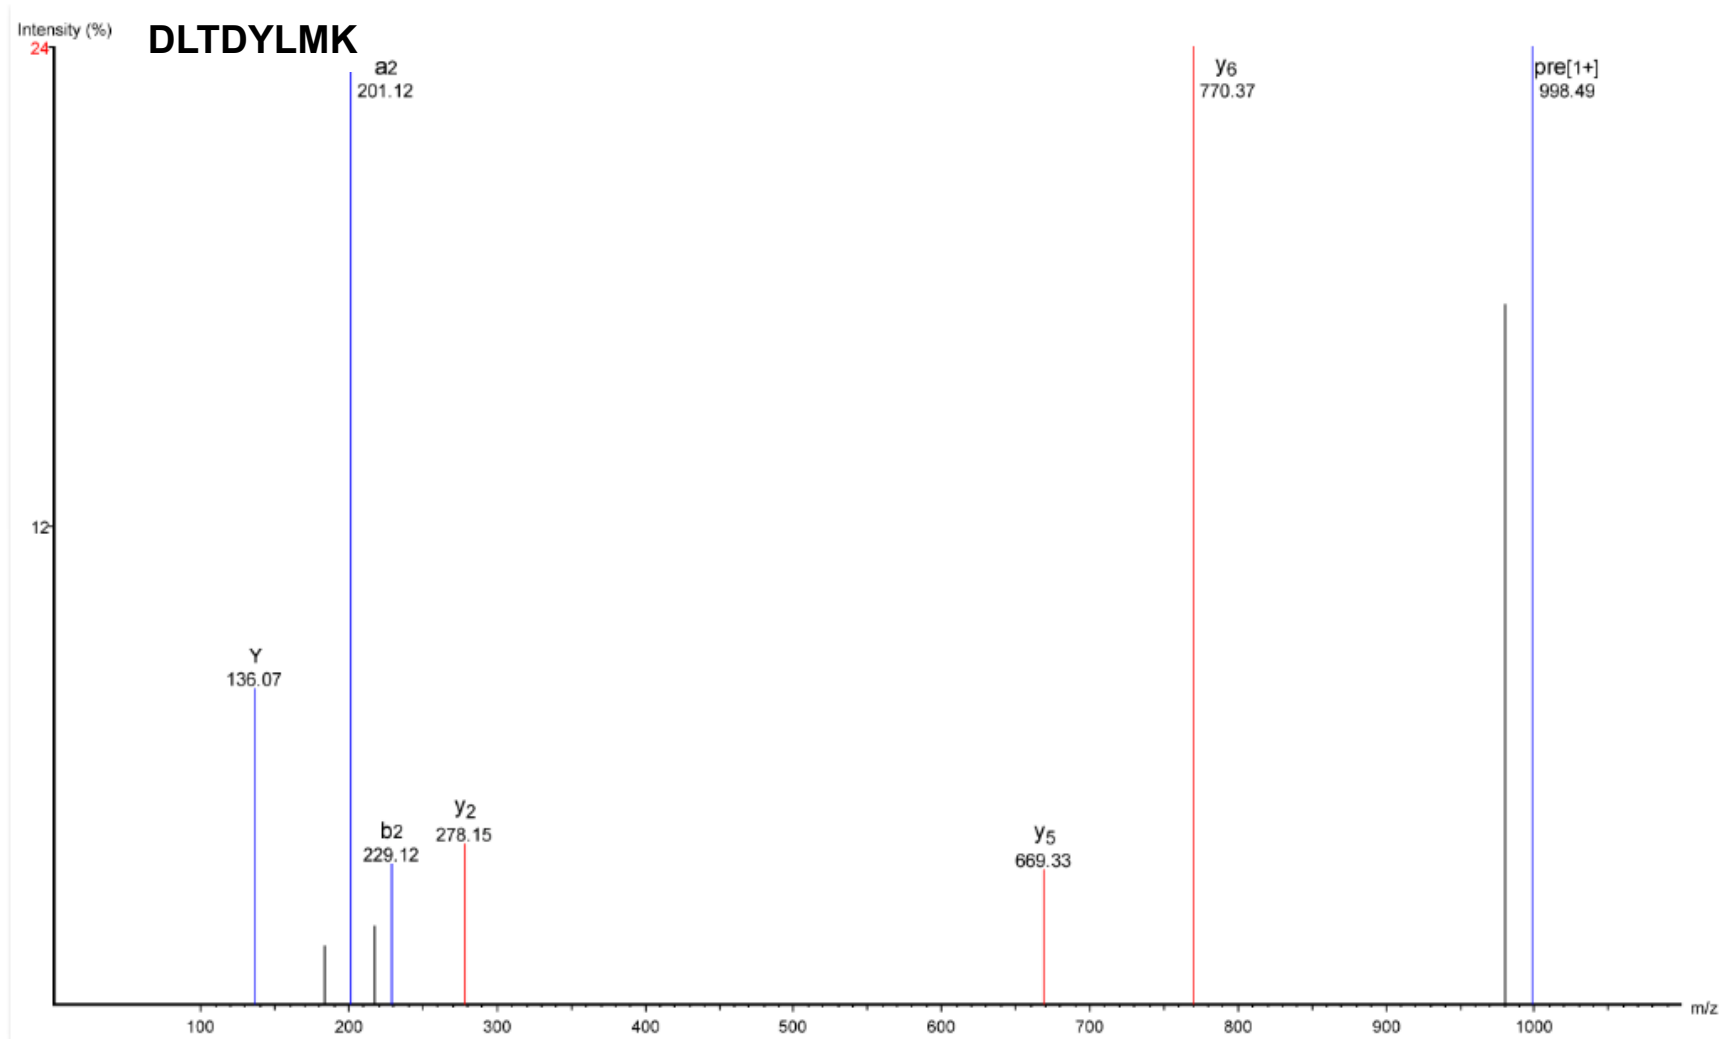

MS/MS spectrum of the peptide DLTDYLMK identified from actin (P63261). Deisotoped peptide ion m/z: 998.49<sup>+1</sup>.



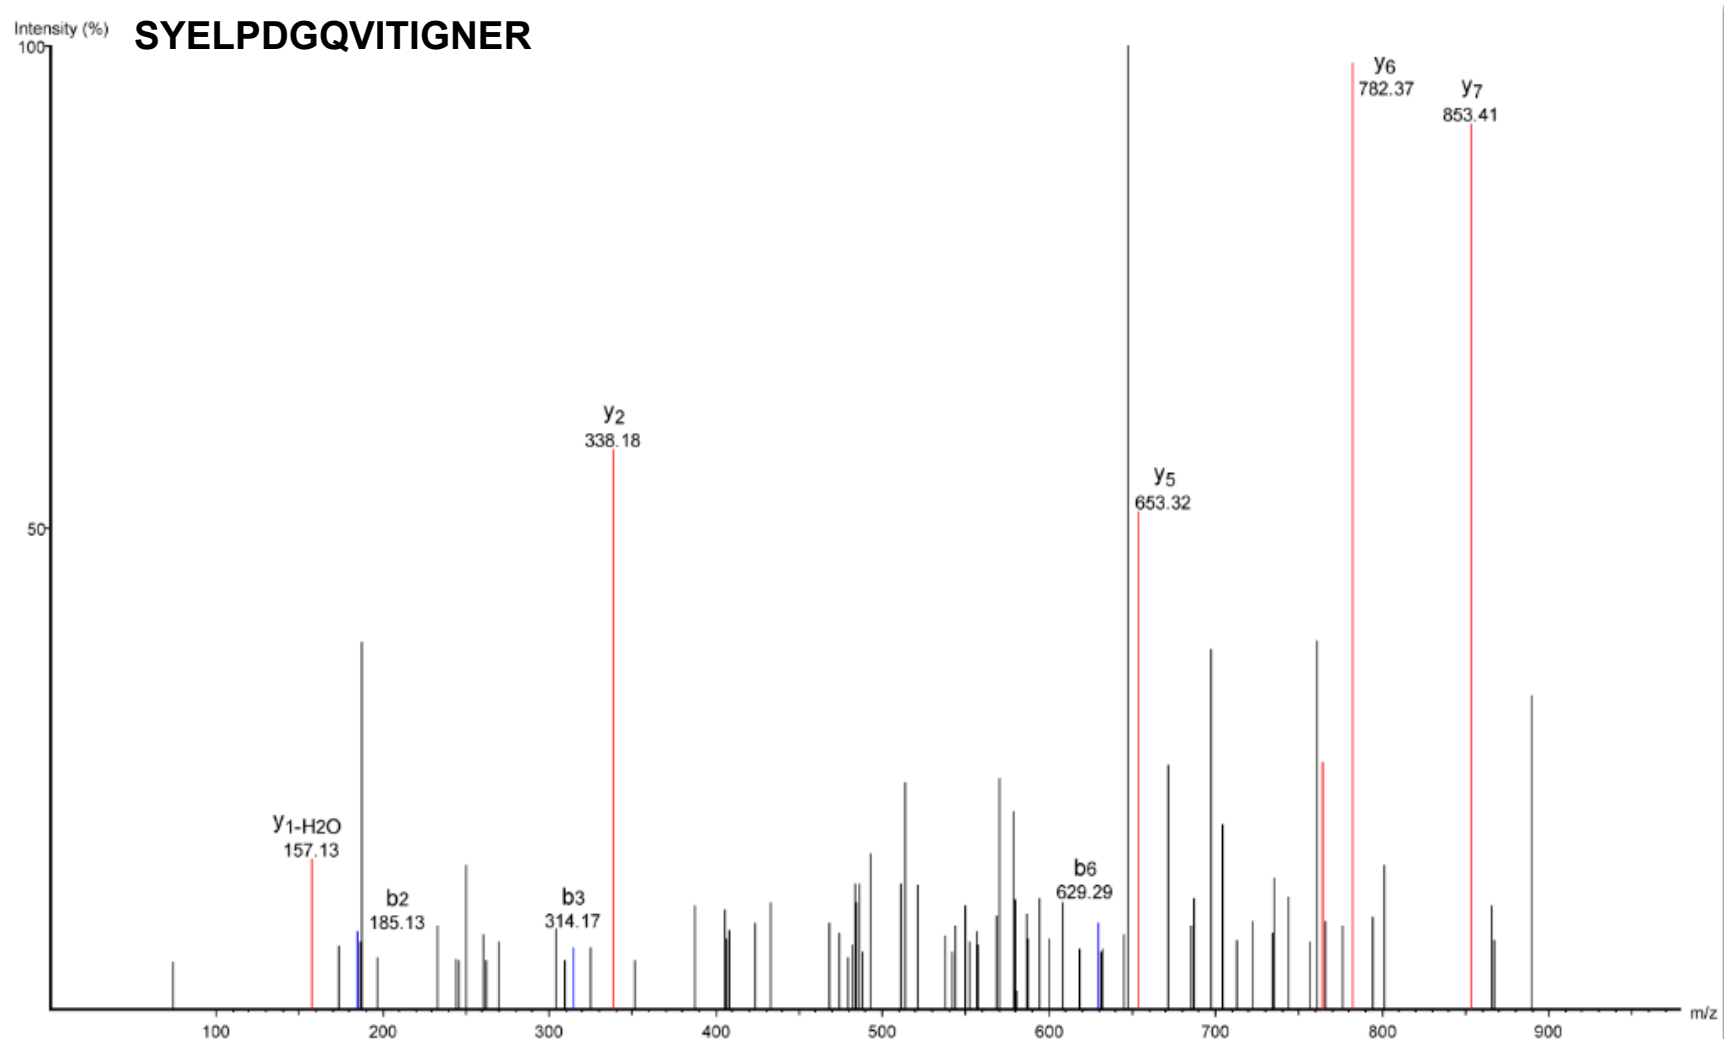

Figure. MS/MS spectrum of the peptide SYELPDGQVITIGNER identified from beta-actin-like protein (Q562R1). Deisotoped peptide ion m/z: 966.48<sup>+1</sup>.

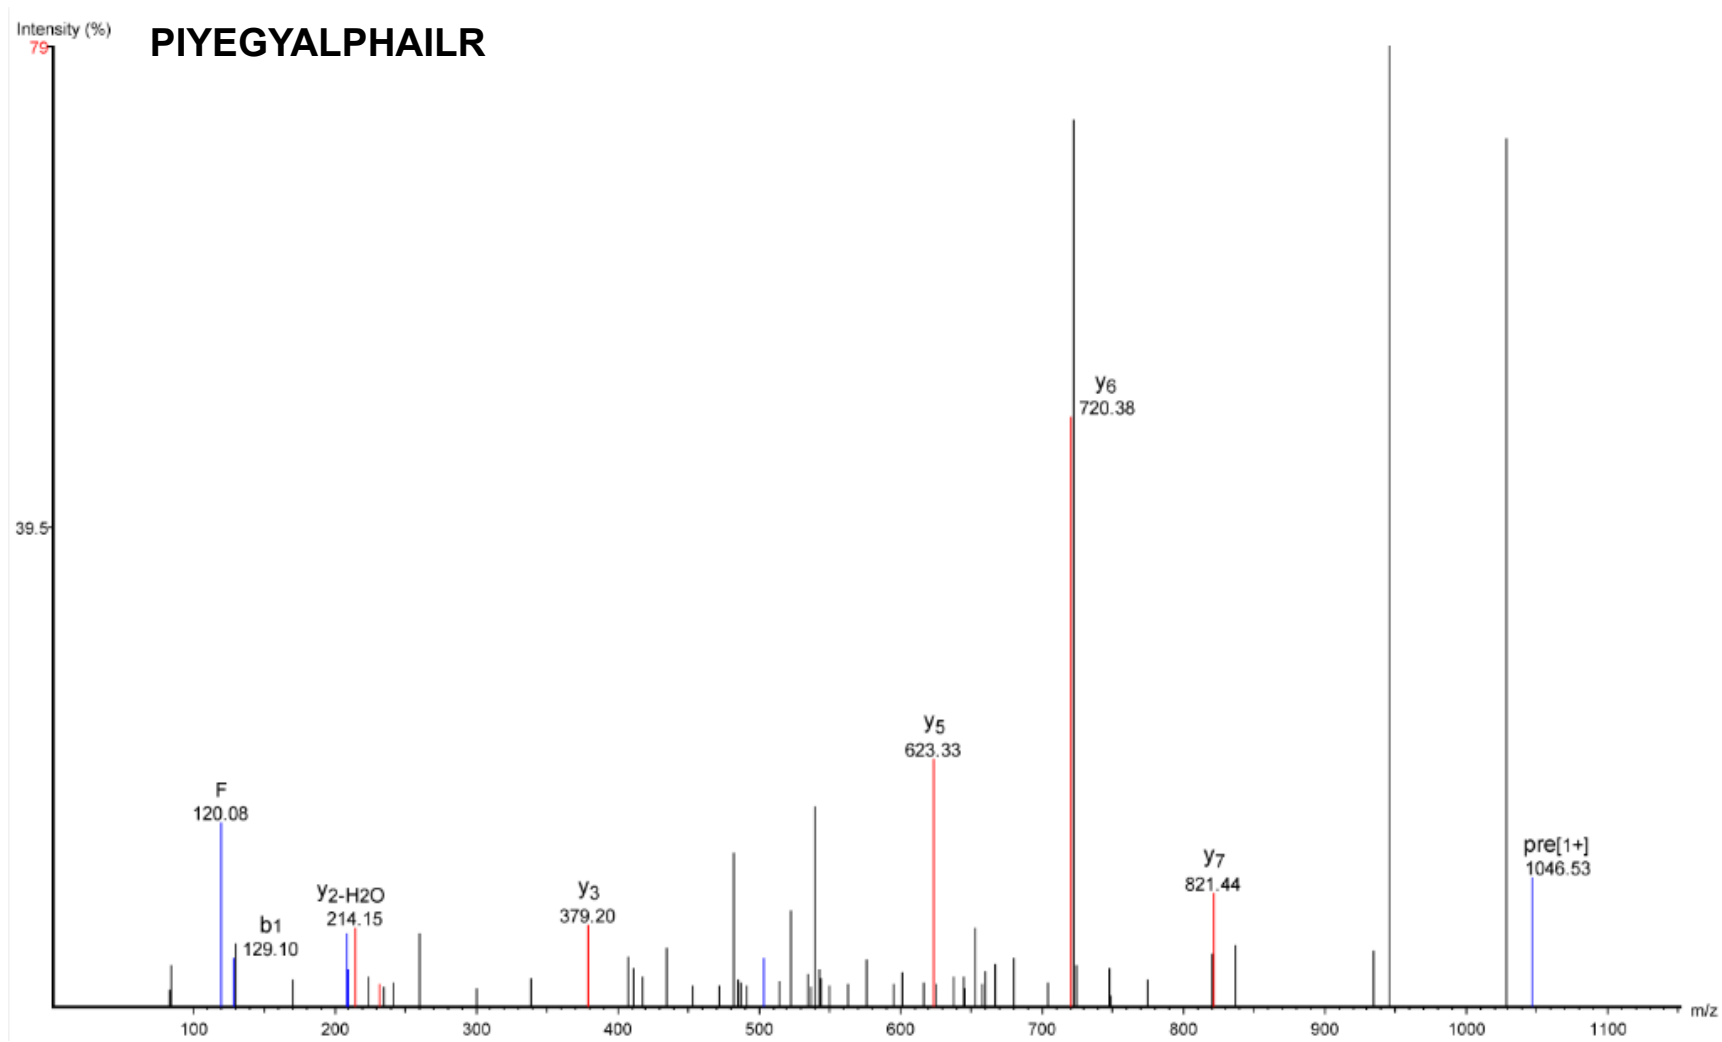

MS/MS spectrum of the peptide PIYEGYALPHAILR identified from beta-actin-like protein (Q562R1). Deisotoped peptide ion m/z: 1046.53<sup>+1</sup>.

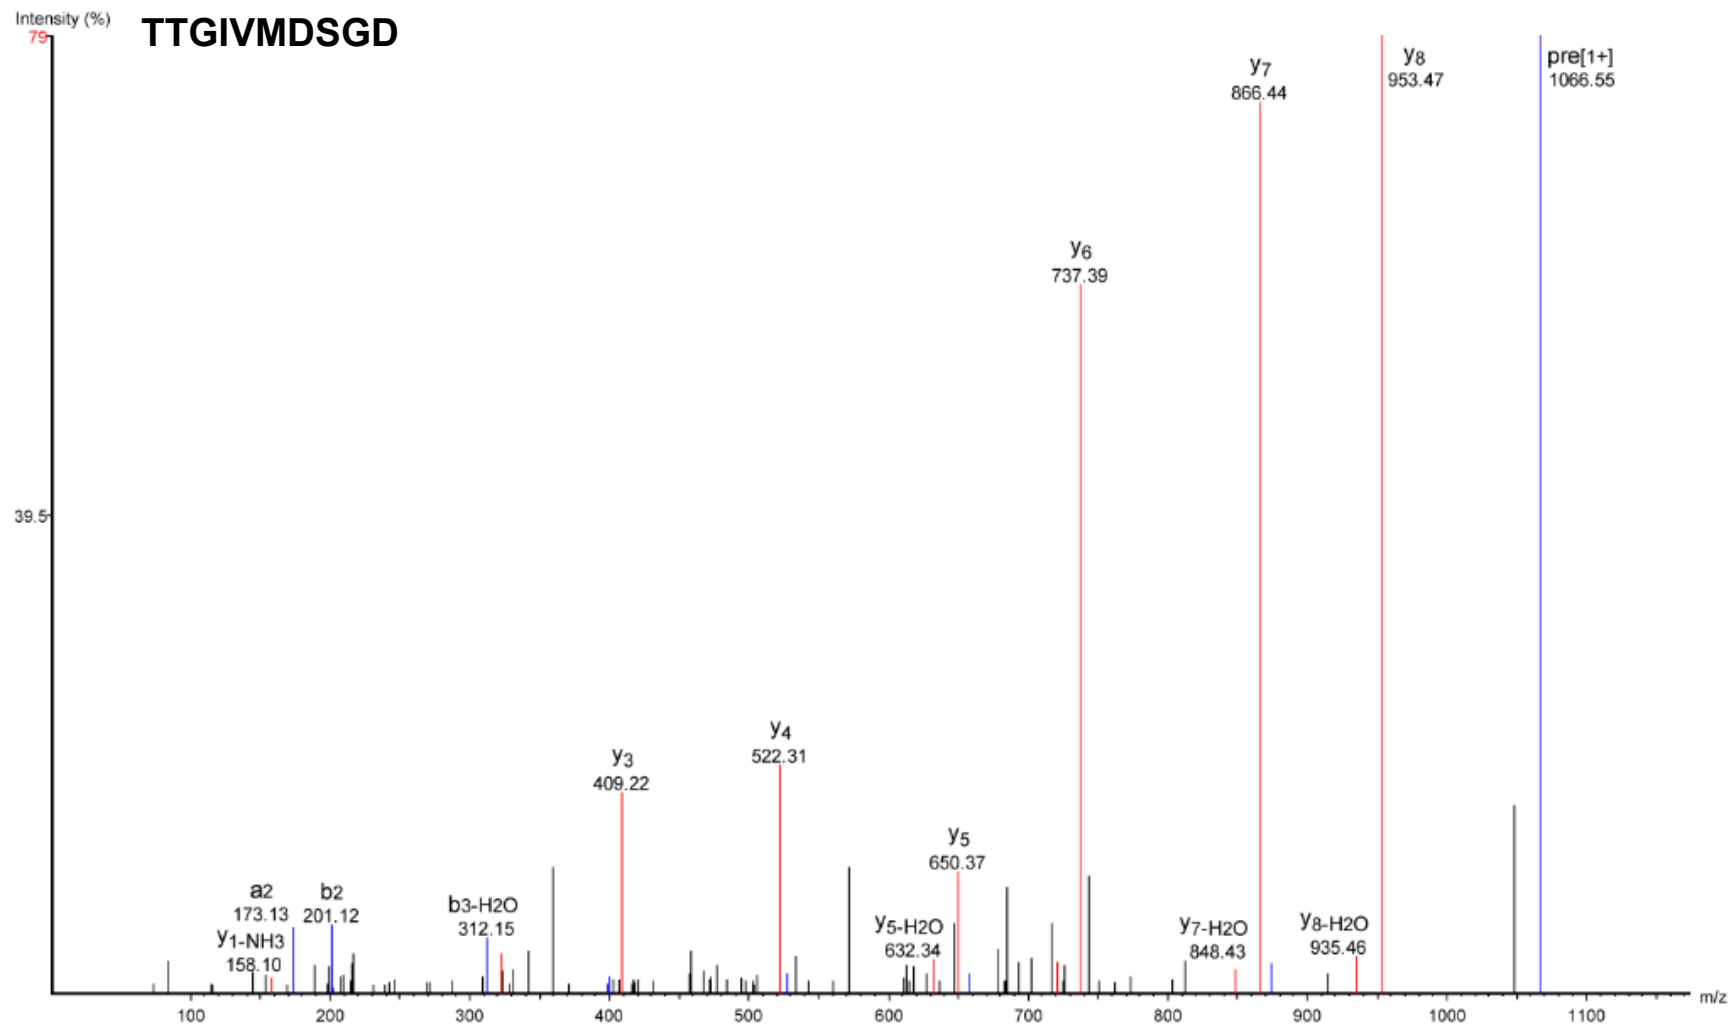

MS/MS spectrum of the peptide TTGIVMDSGD identified from beta-actin-like protein (Q562R1). Deisotoped peptide ion m/z: 1066.55<sup>+1</sup>.

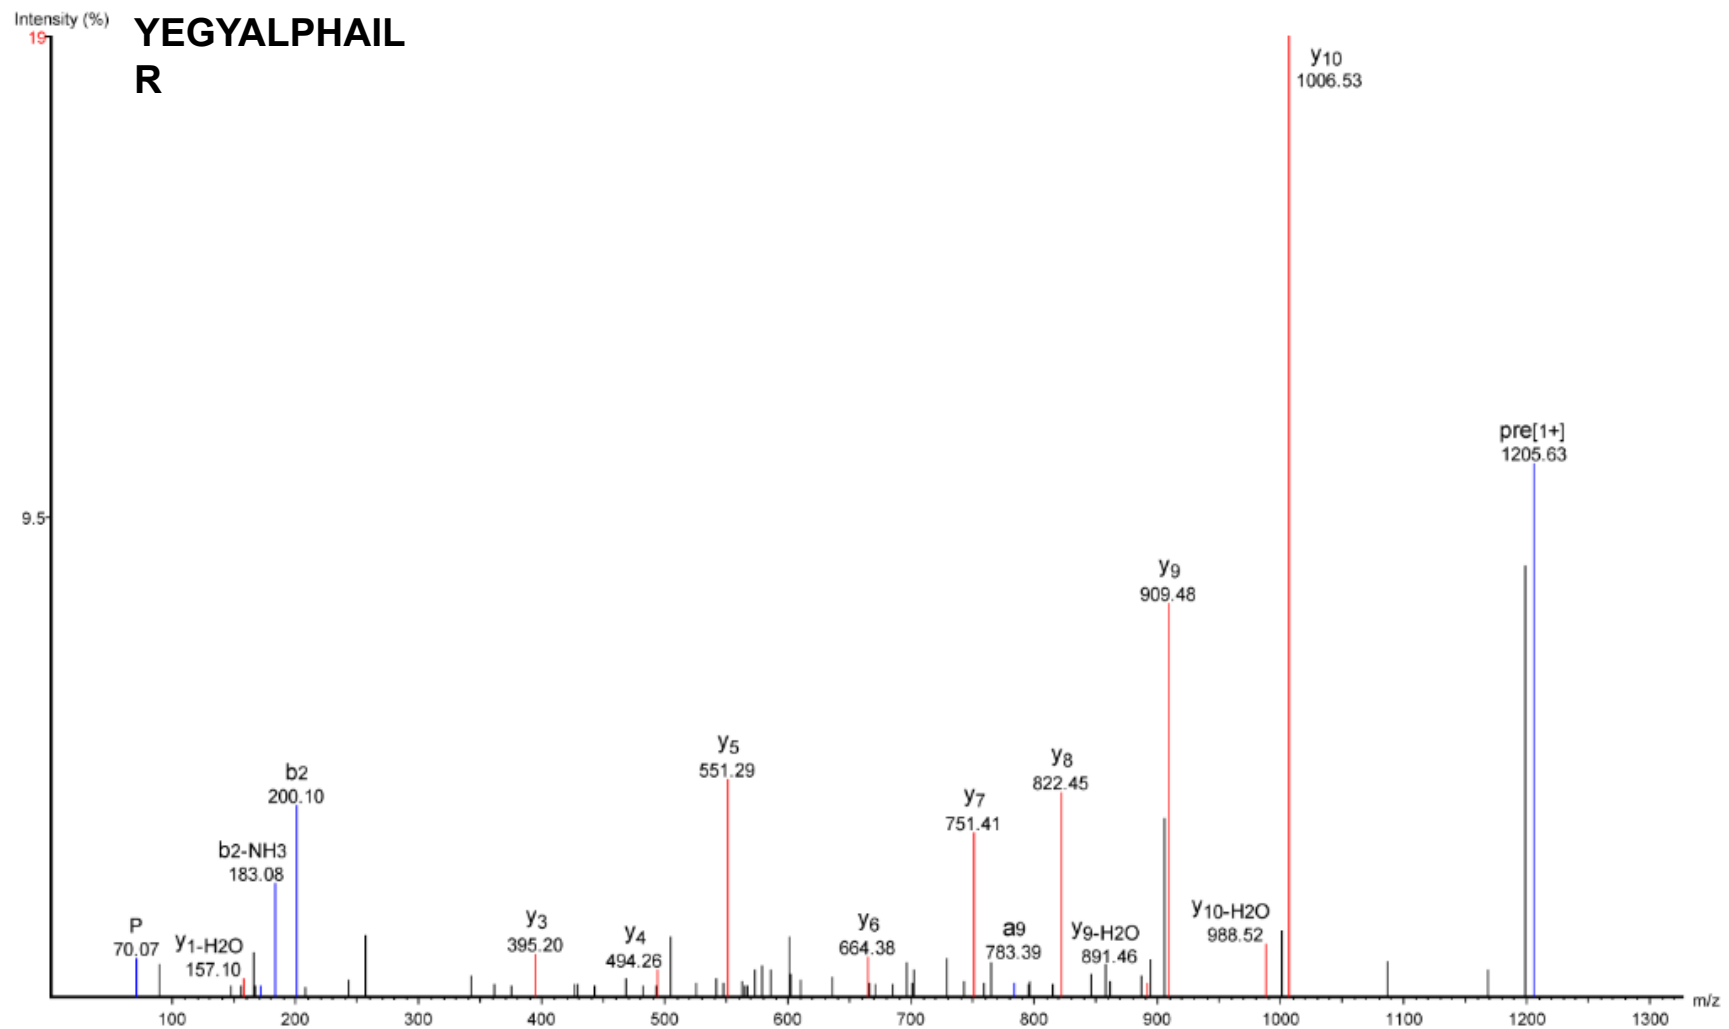

MS/MS spectrum of the peptide YEGYALPHAILR identified from beta-actin-like protein (Q562R1). Deisotoped peptide ion m/z: 1205.63<sup>+1</sup>.

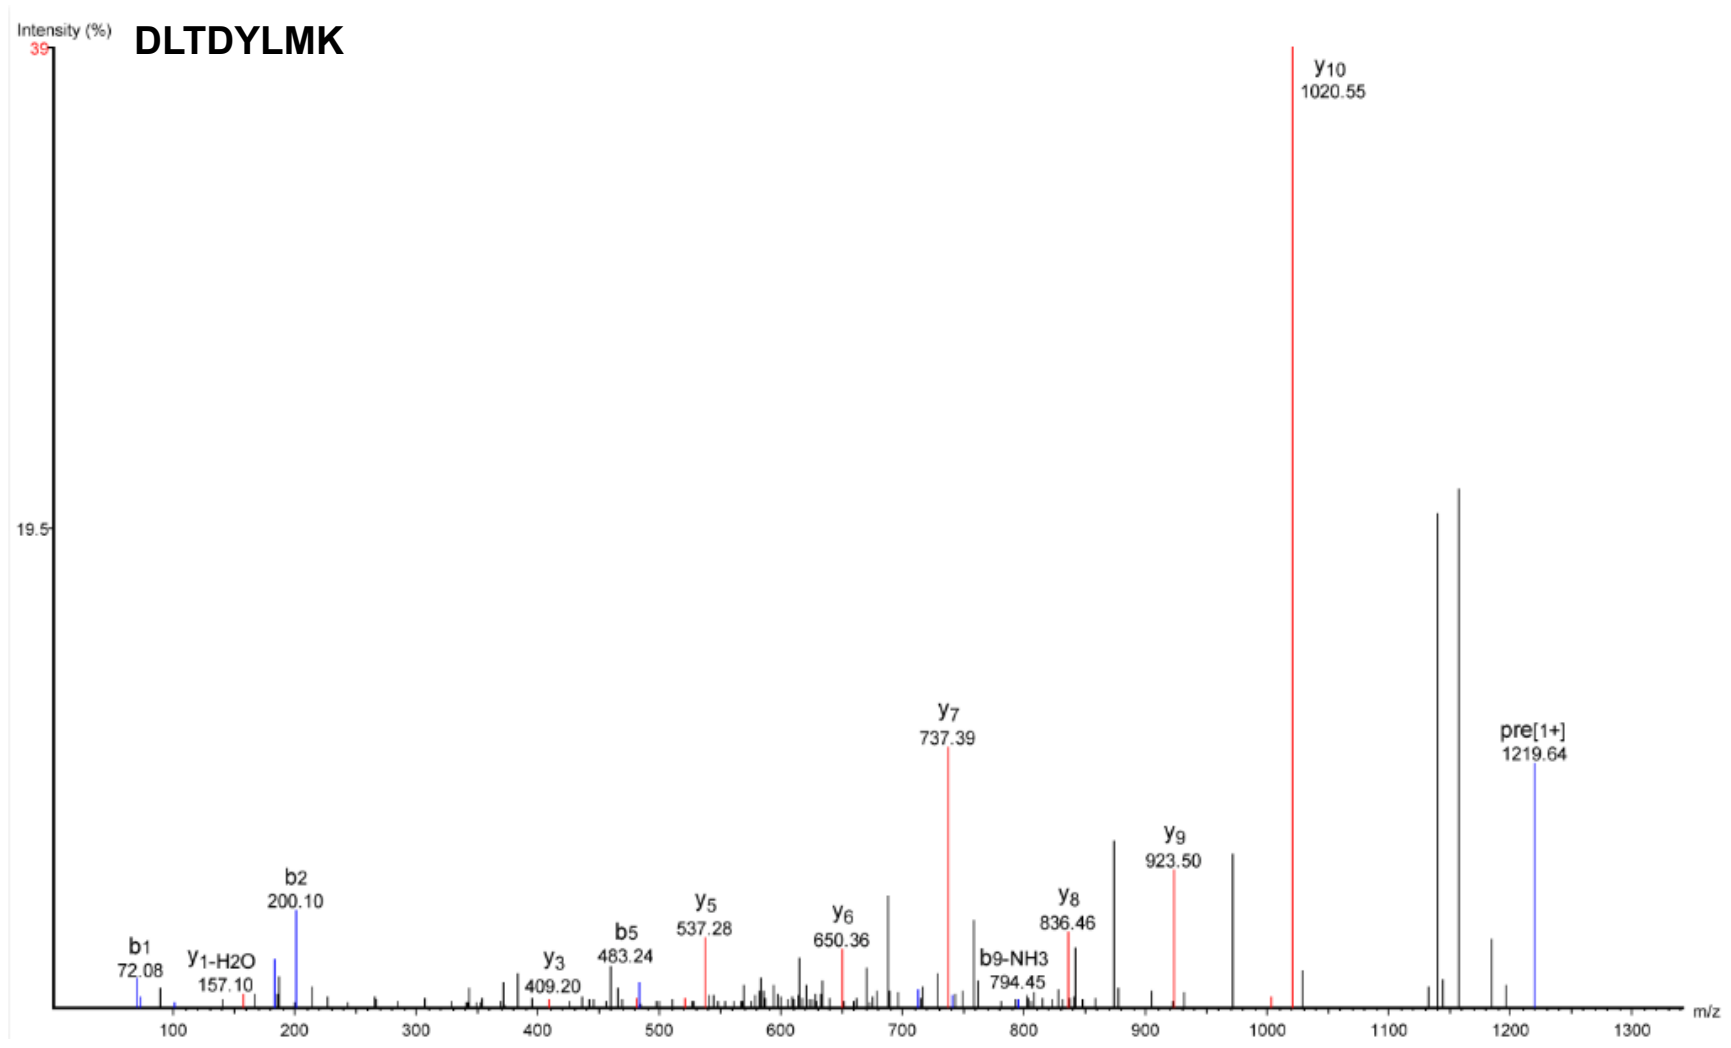

MS/MS spectrum of the peptide DLTDYLMK identified from beta-actin-like protein (Q562R1). Deisotoped peptide ion m/z: 1219.64<sup>+1</sup>.

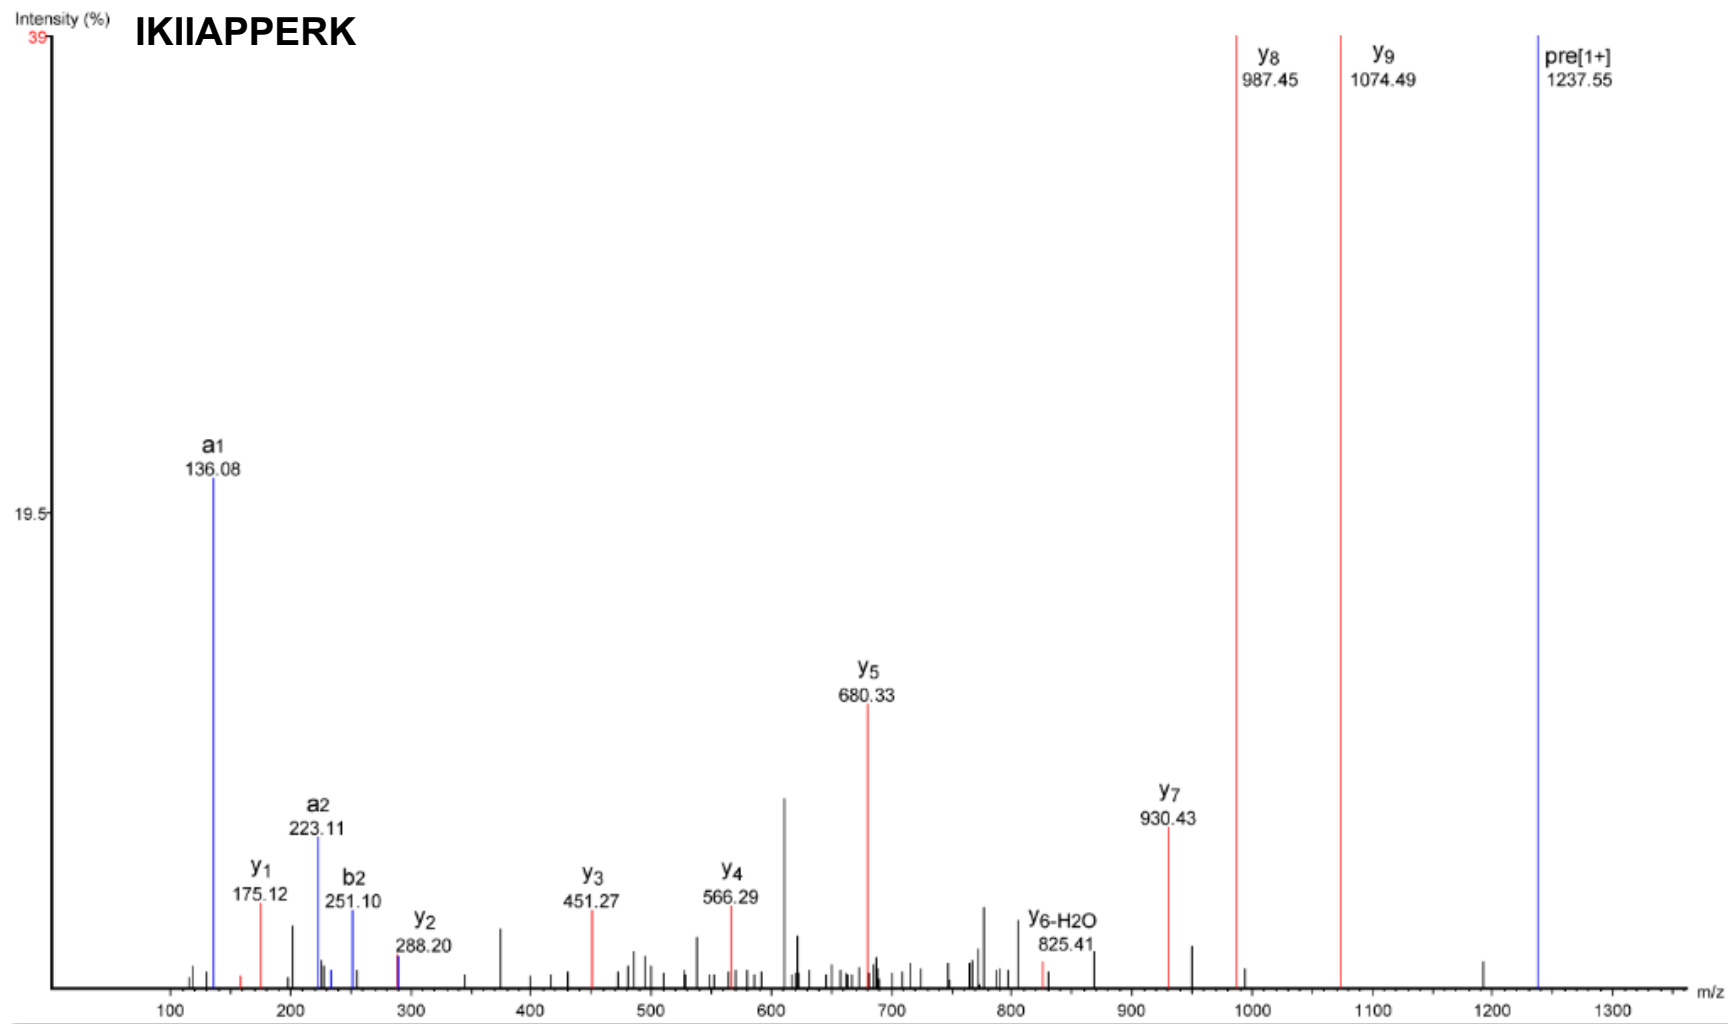

MS/MS spectrum of the peptide IKIAPPERK identified from beta-actin-like protein (Q562R1). Deisotoped peptide ion m/z: 1237.55<sup>+1</sup>.

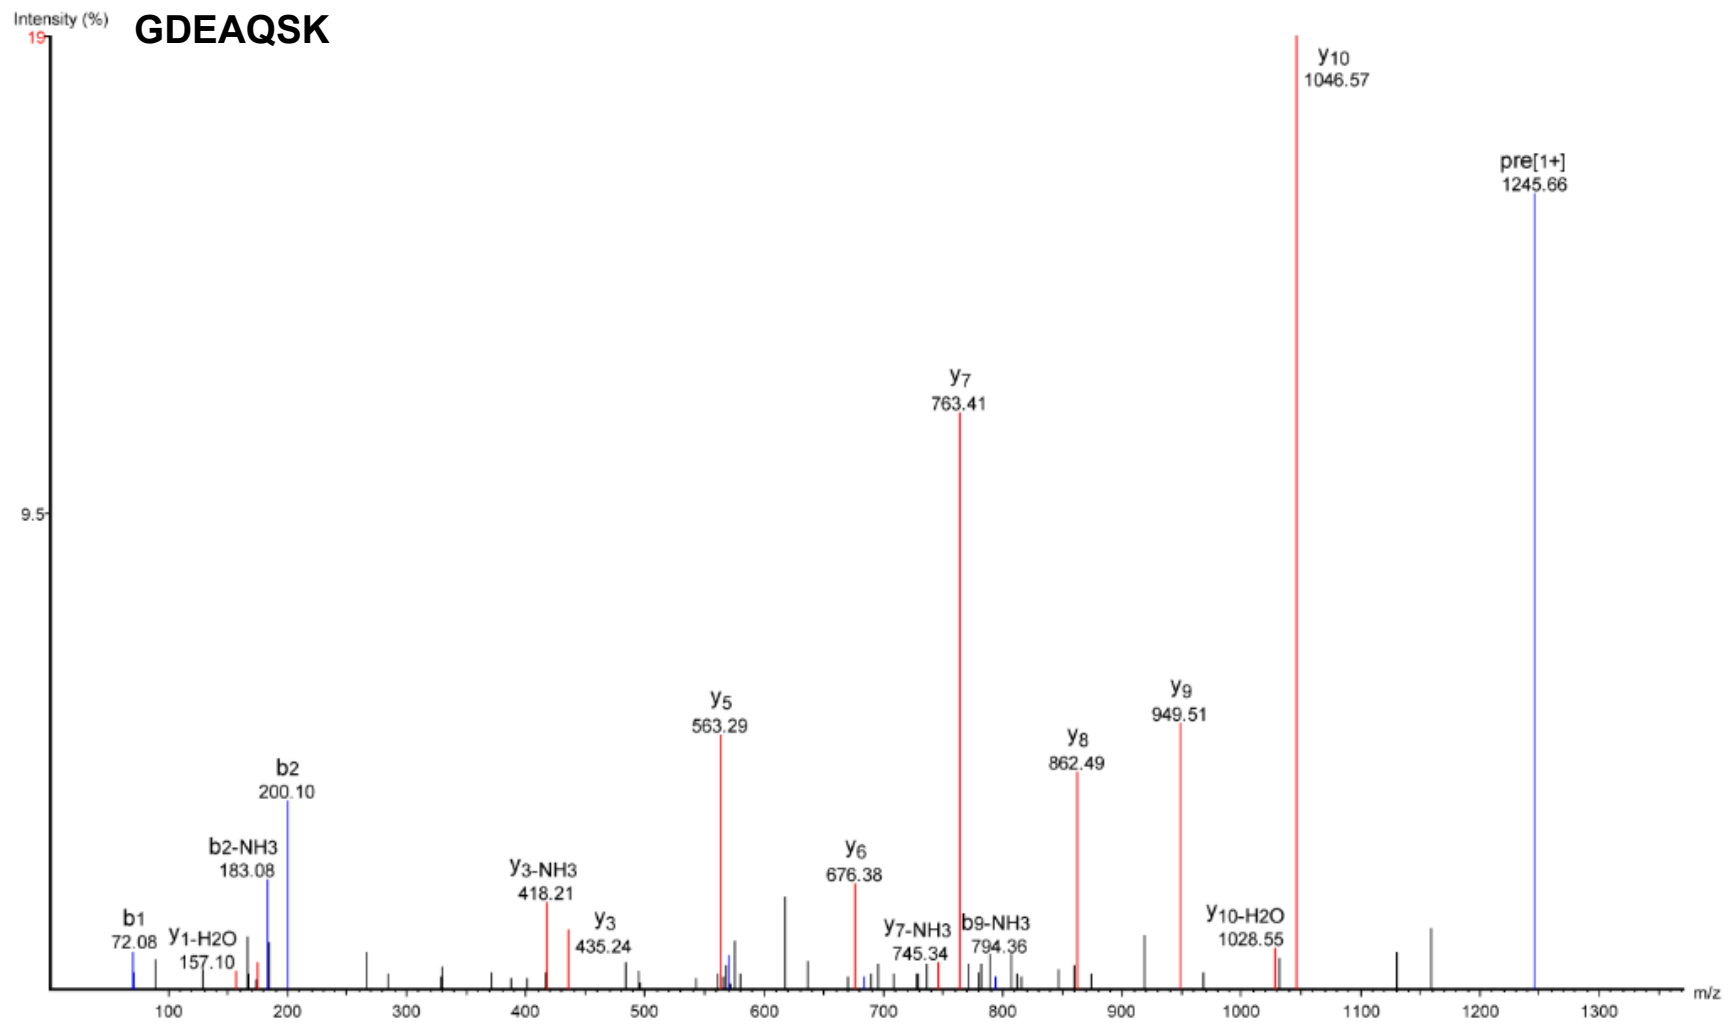

MS/MS spectrum of the peptide GDEAQS K identified from beta-actin-like protein (Q562R1). Deisotoped peptide ion m/z: 1245.66<sup>+1</sup>.

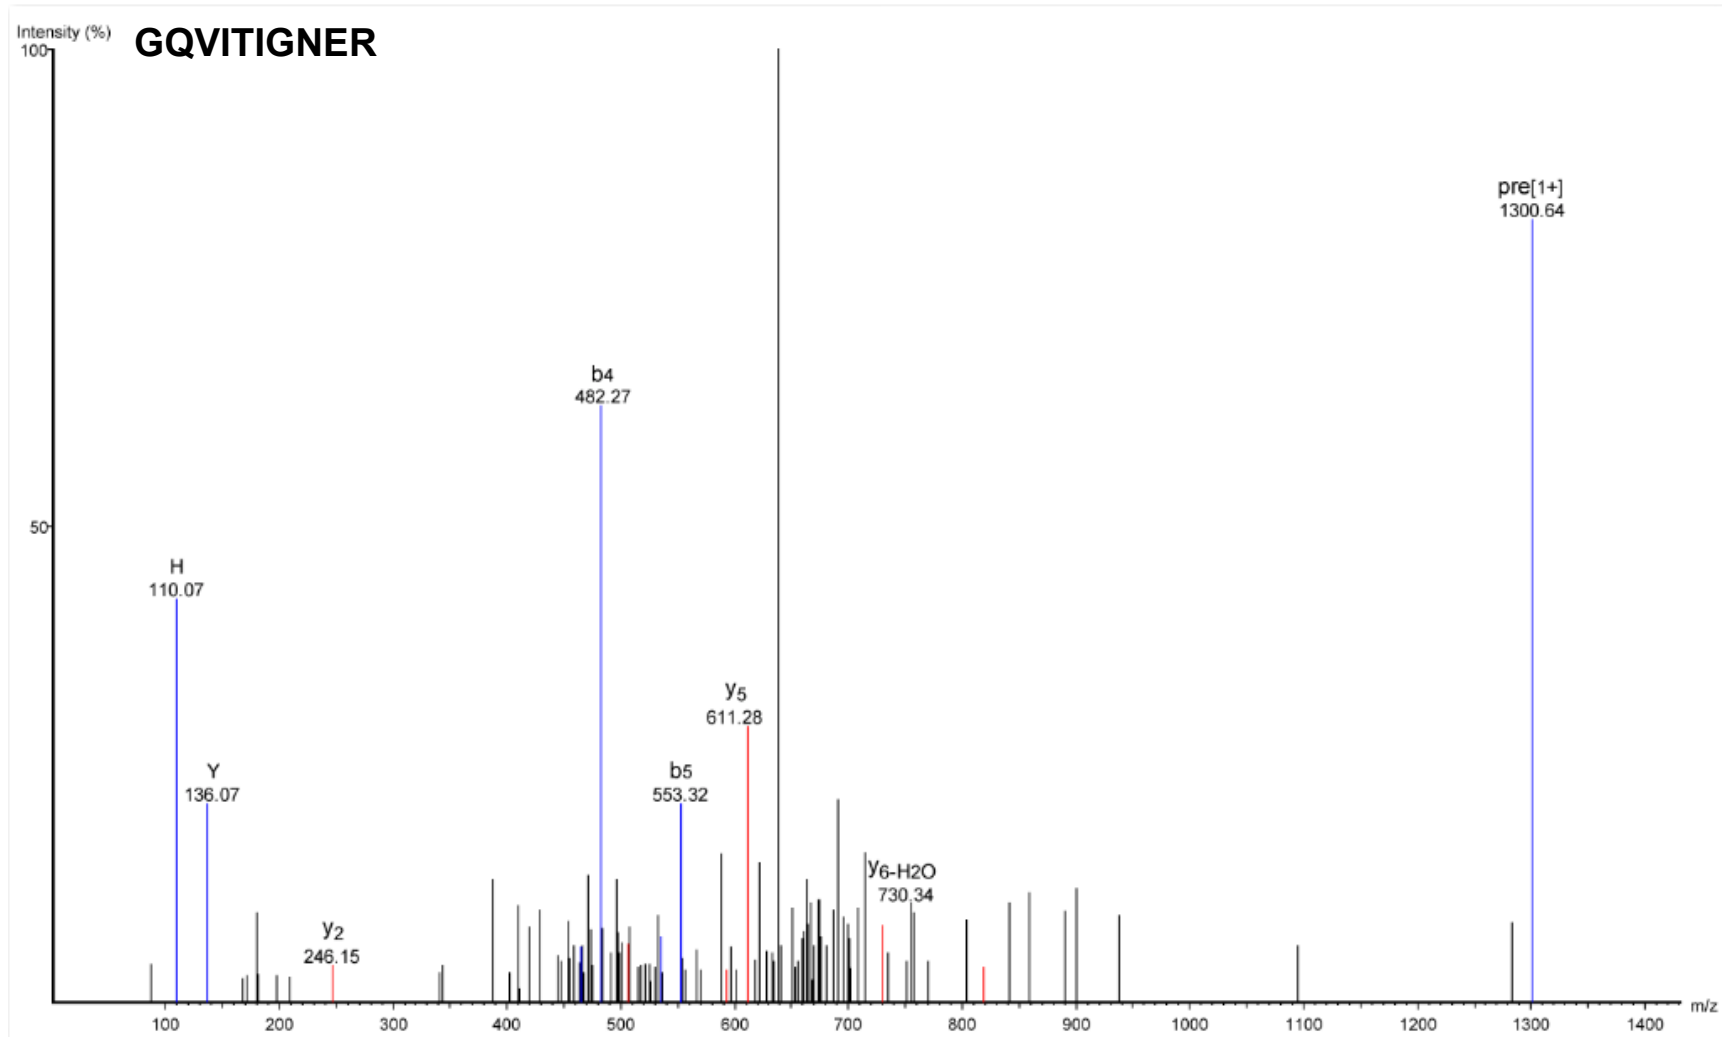

MS/MS spectrum of the peptide GQVITIGNER identified from beta-actin-like protein (Q562R1). Deisotoped peptide ion m/z: 1300.64<sup>+1</sup>.



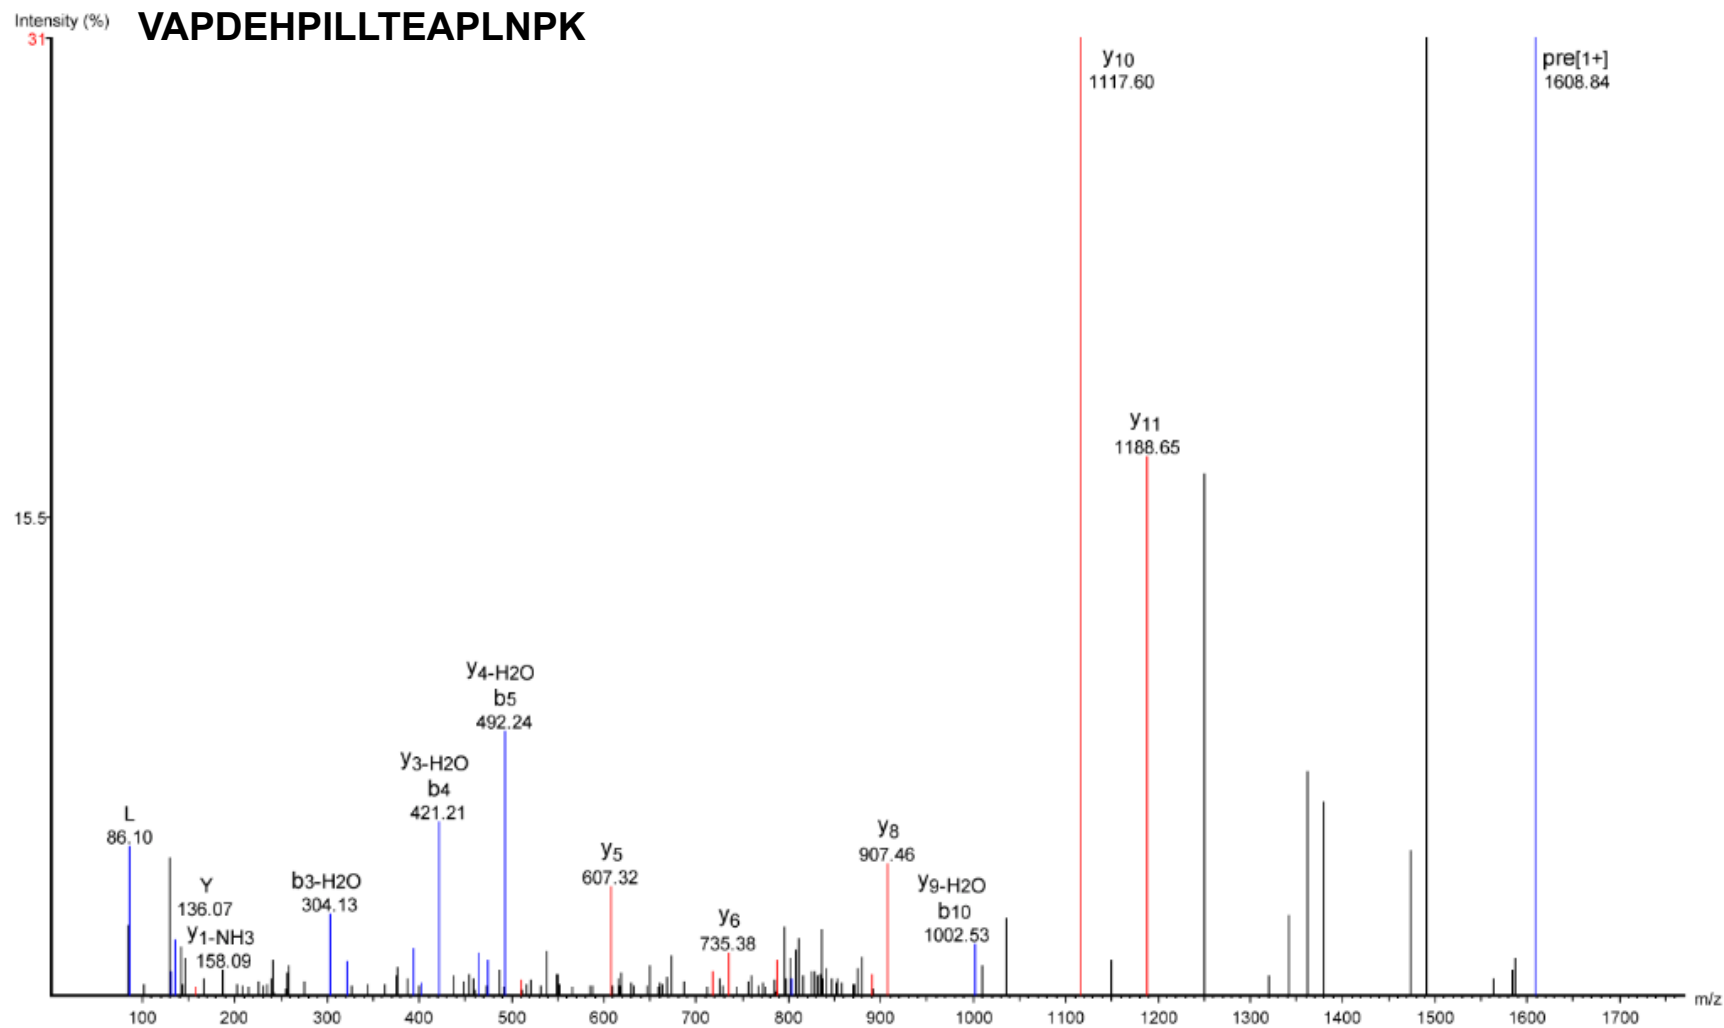

MS/MS spectrum of the peptide VAPDEHPILLTEAPLNPK identified from beta-actin-like protein (Q562R1). Deisotoped peptide ion m/z: 1608.84<sup>+1</sup>.

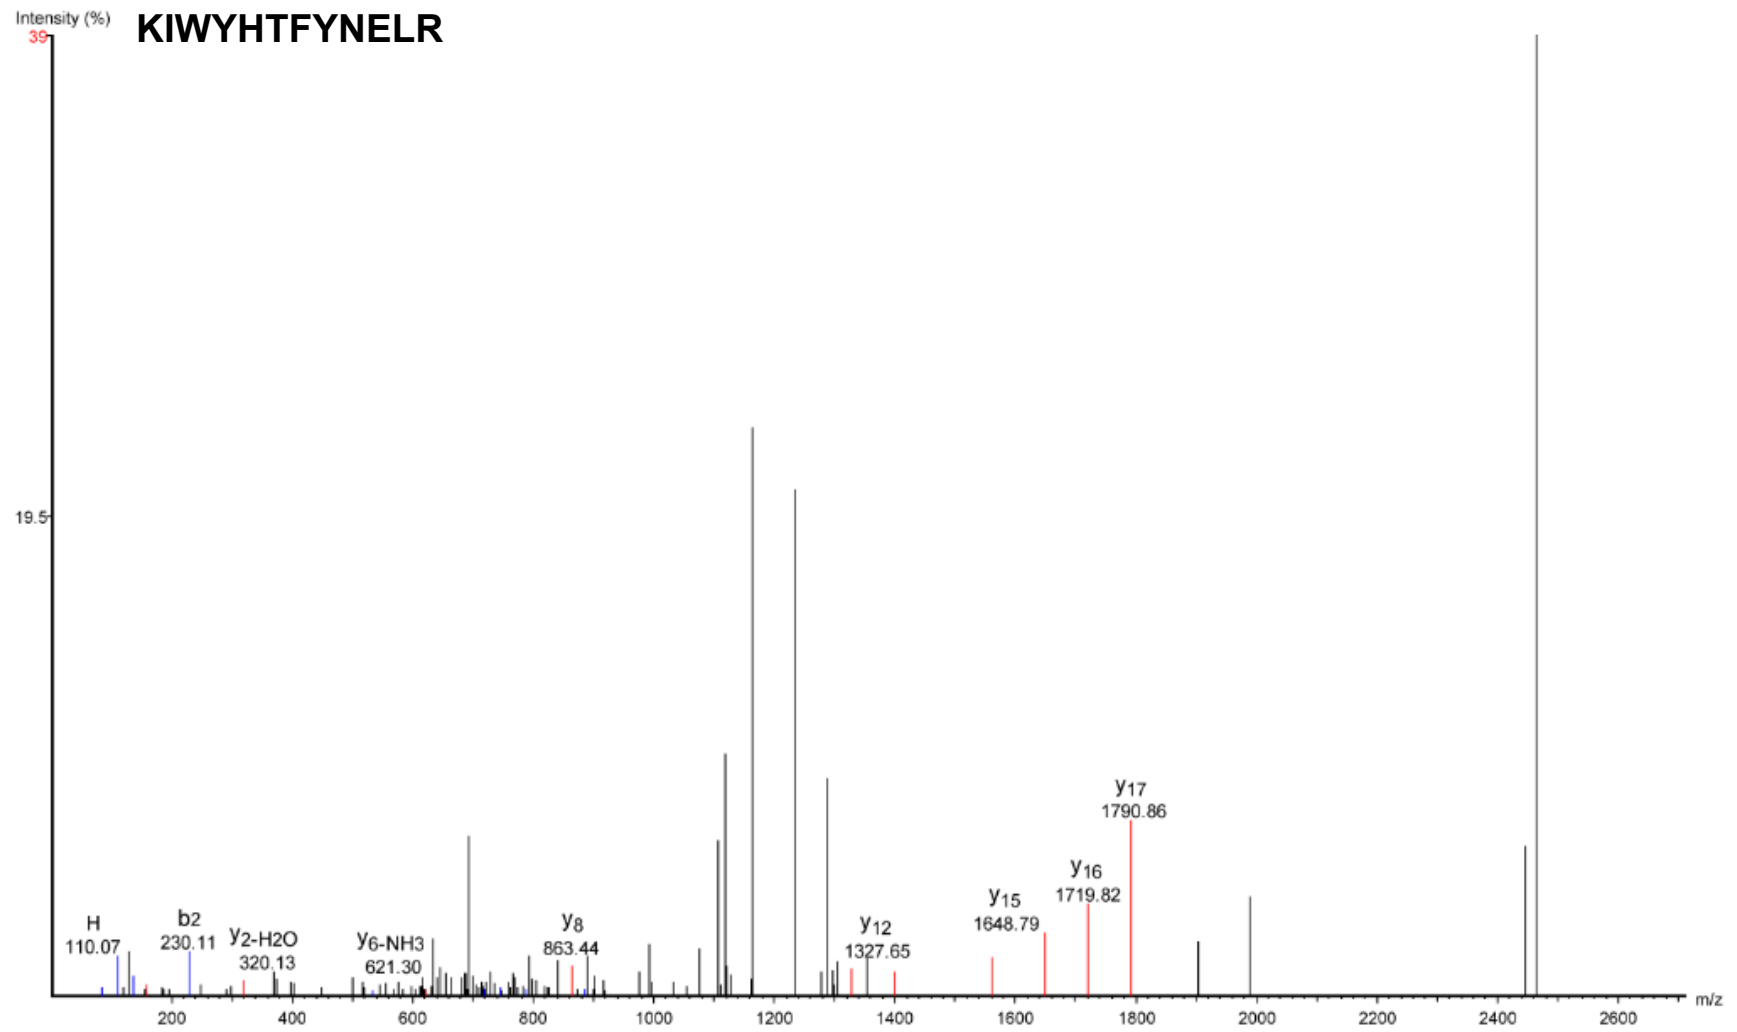

MS/MS spectrum of the peptide KIWYHTFYNELR identified from beta-actin-like protein (Q562R1). Deisotoped peptide ion m/z: 2465.18<sup>+1</sup>.

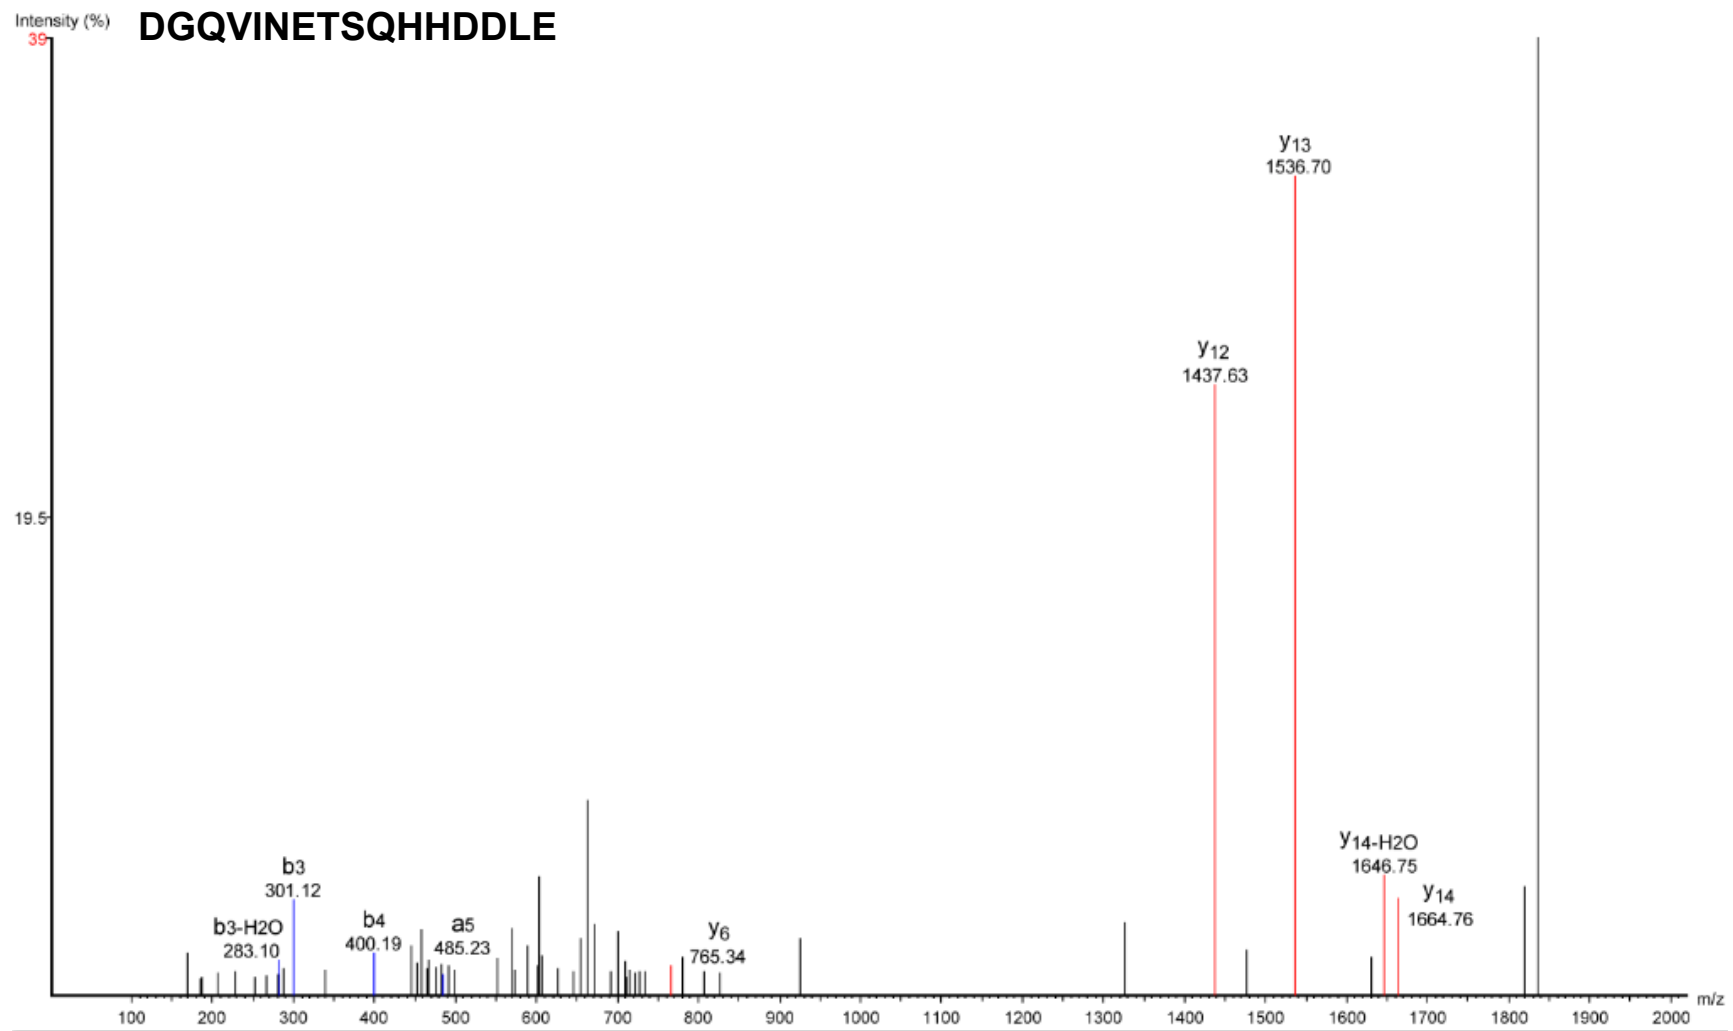

MS/MS spectrum of the peptide DGQVINETSQHHDDLE identified from human vimentin (P08670). Deisotoped peptide ion m/z: 1836.80<sup>+1</sup>.

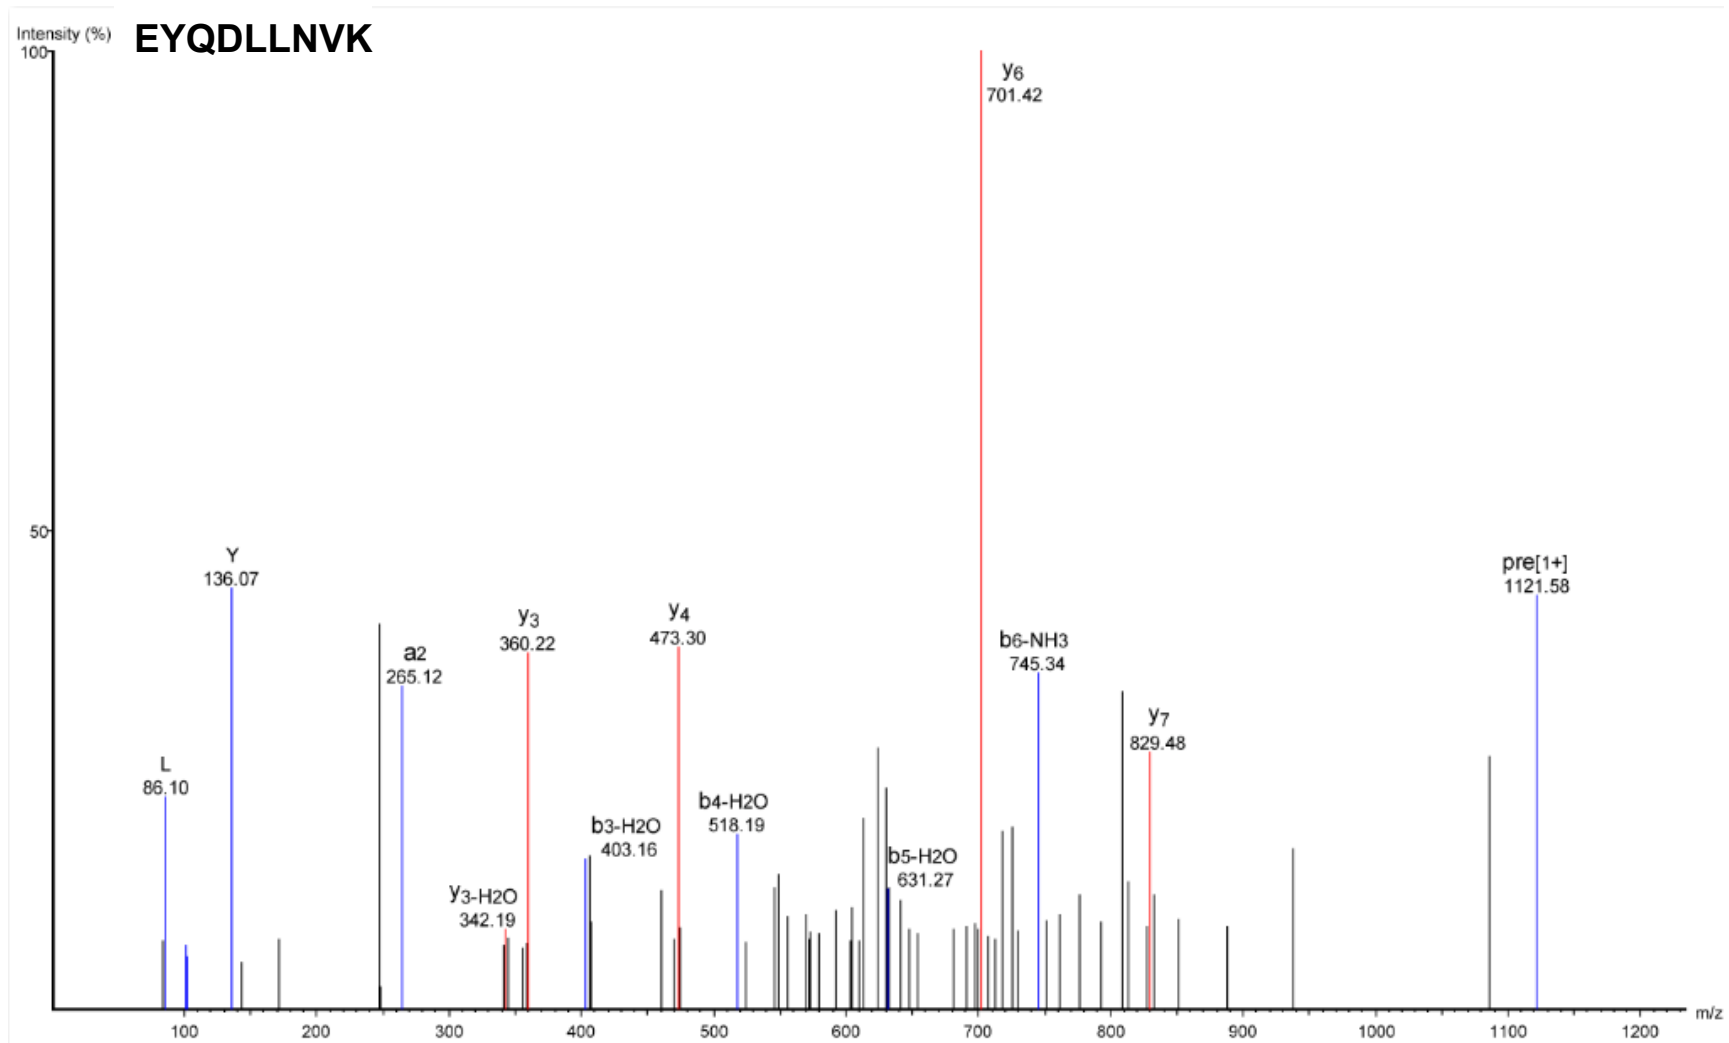

MS/MS spectrum of the peptide EYQDLLNVK identified from human vimentin (P08670). Deisotoped peptide ion m/z: 1121.58<sup>+1</sup>.

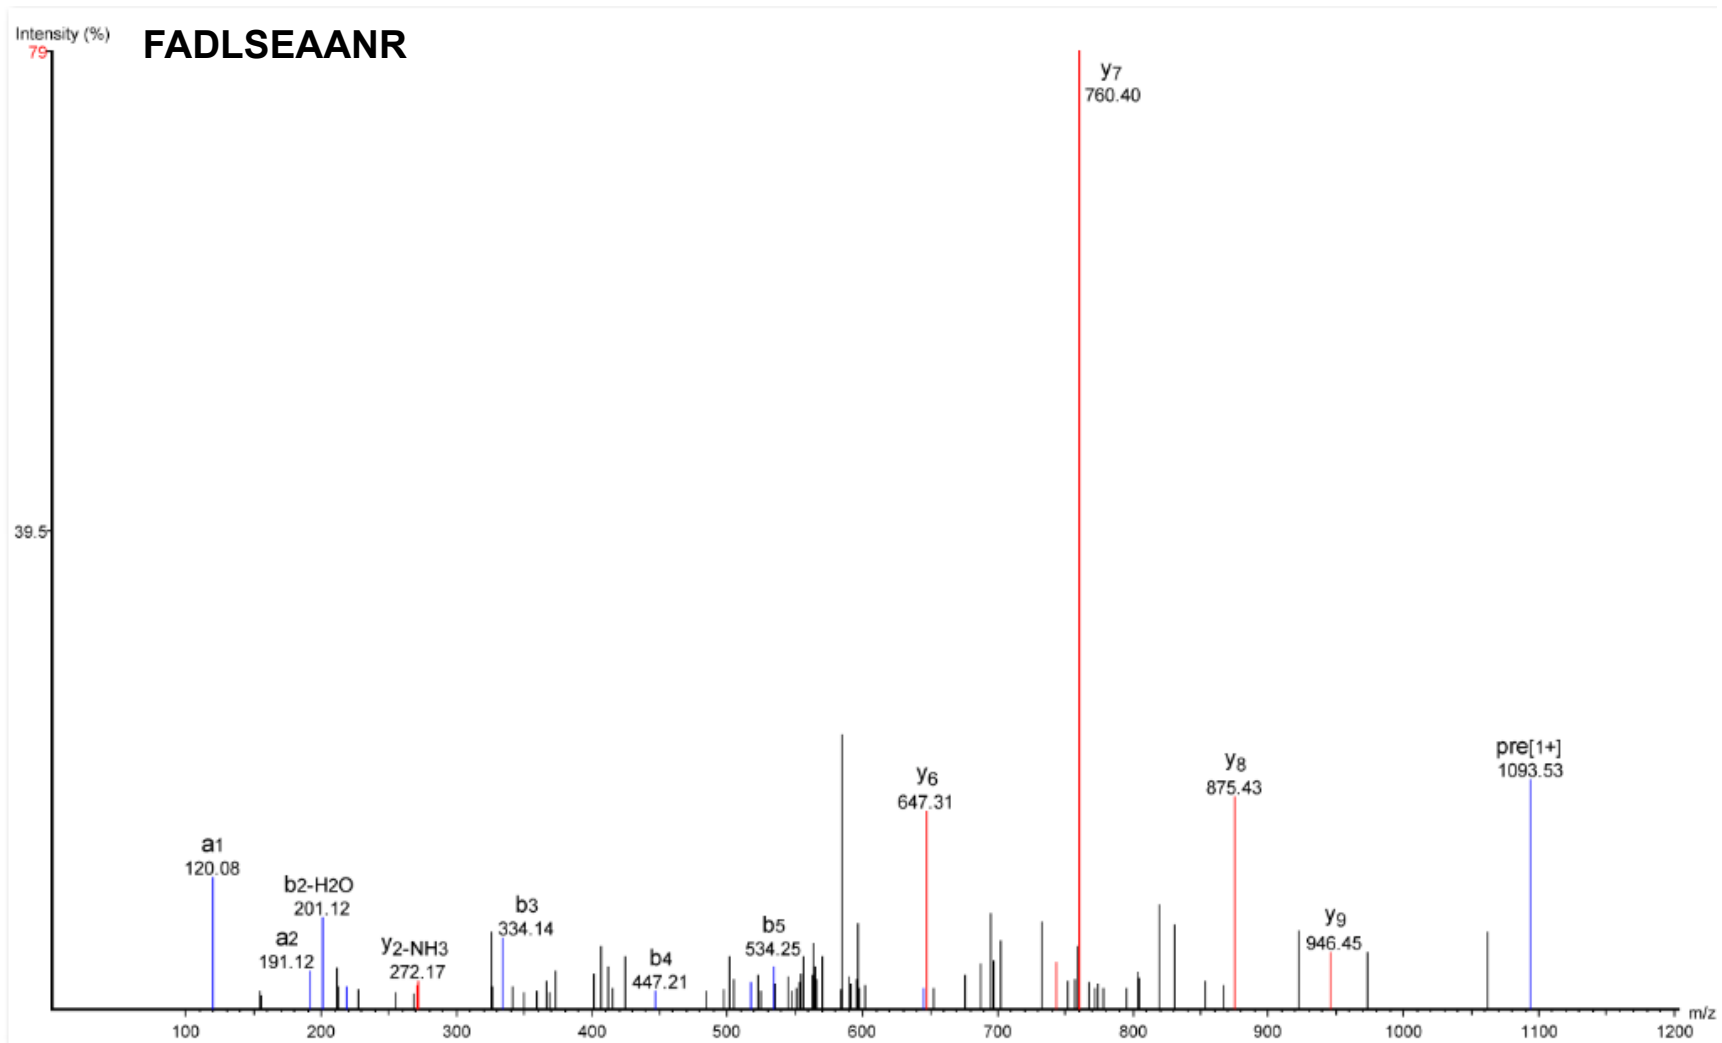

MS/MS spectrum of the peptide FADLSEAANR identified from human vimentin (P08670). Deisotoped peptide ion m/z: 1093.53<sup>+1</sup>.

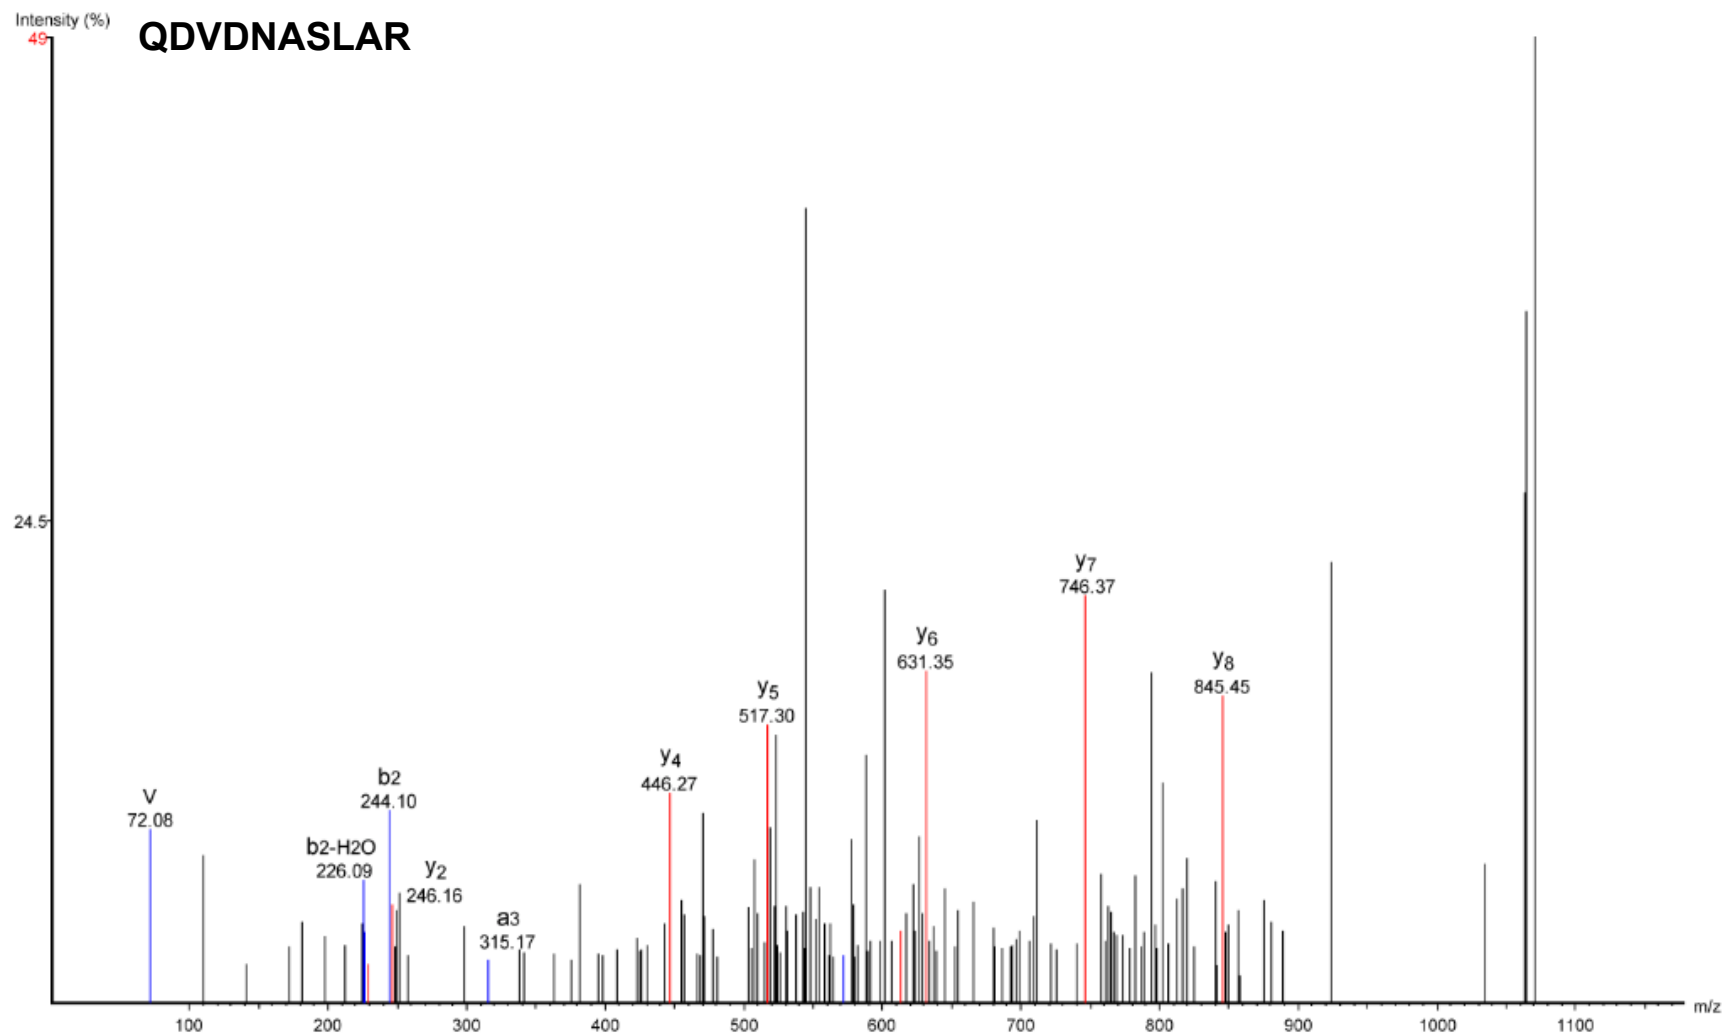

MS/MS spectrum of the peptide QDVDNASLAR identified from human vimentin (P08670). Deisotoped peptide ion  $m/z$ : 1088.53<sup>+1</sup>.

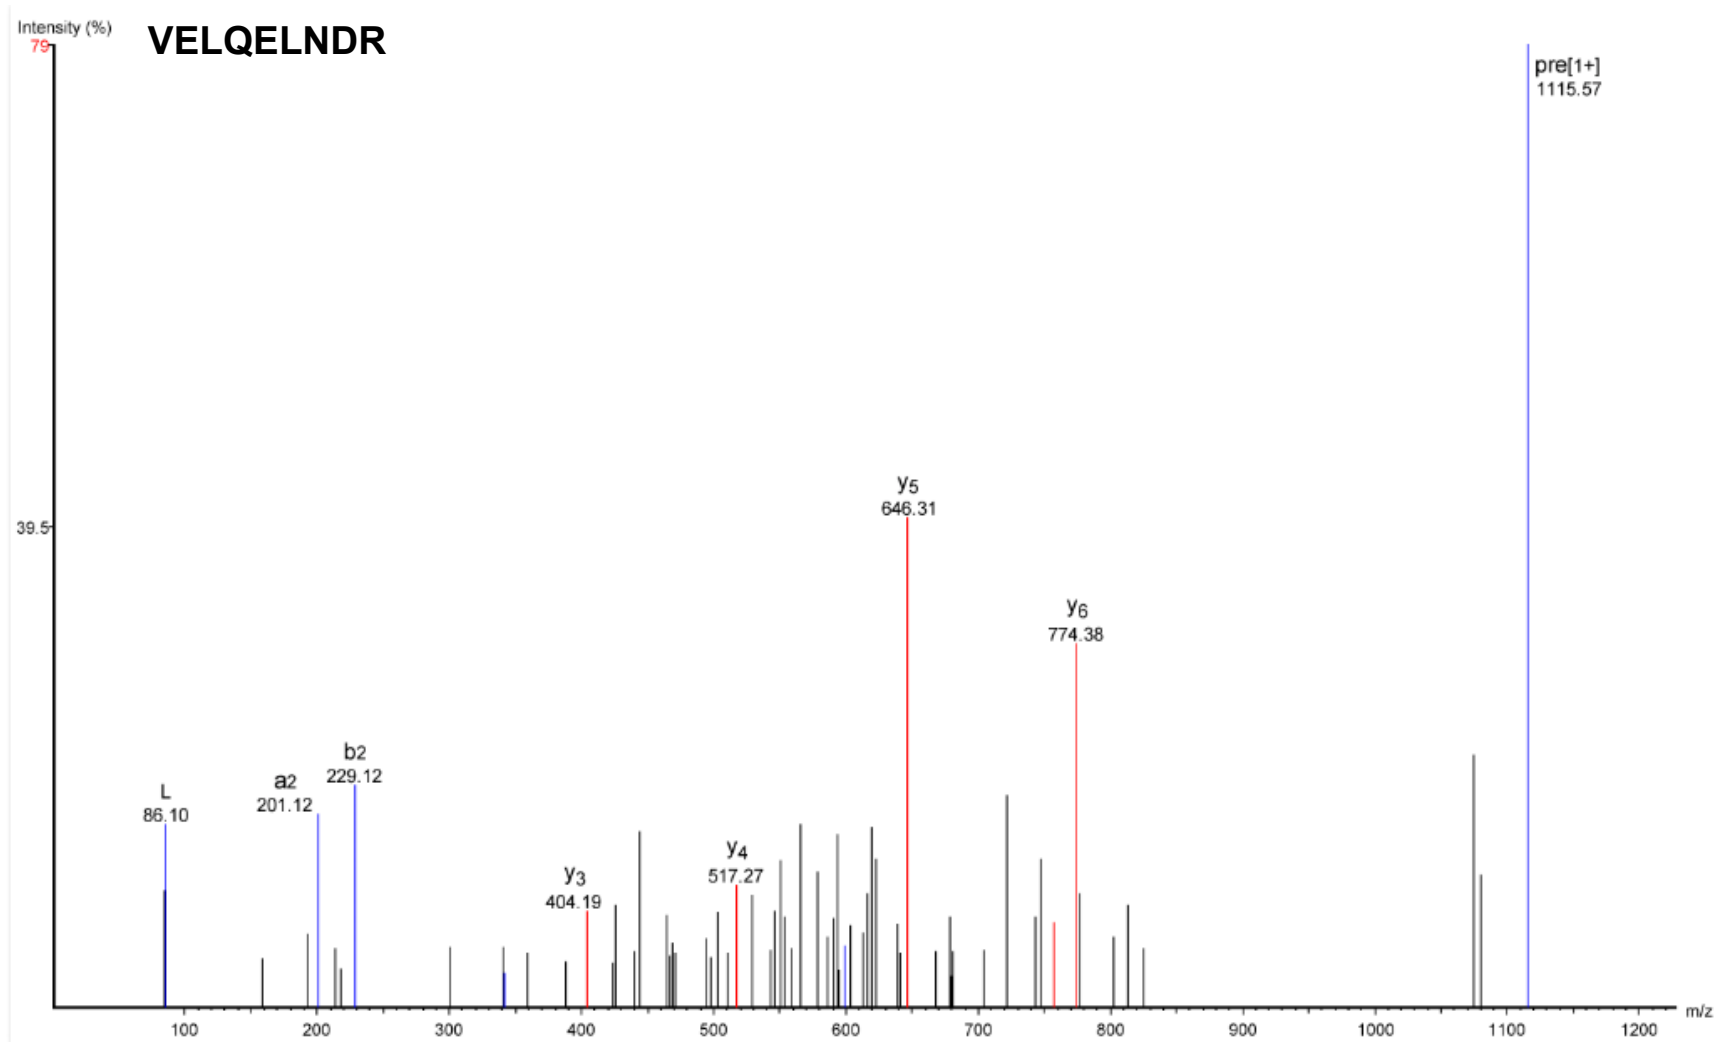

MS/MS spectrum of the peptide VELQELNDR identified from human vimentin (P08670). Deisotoped peptide ion m/z: 1115.57<sup>+1</sup>.

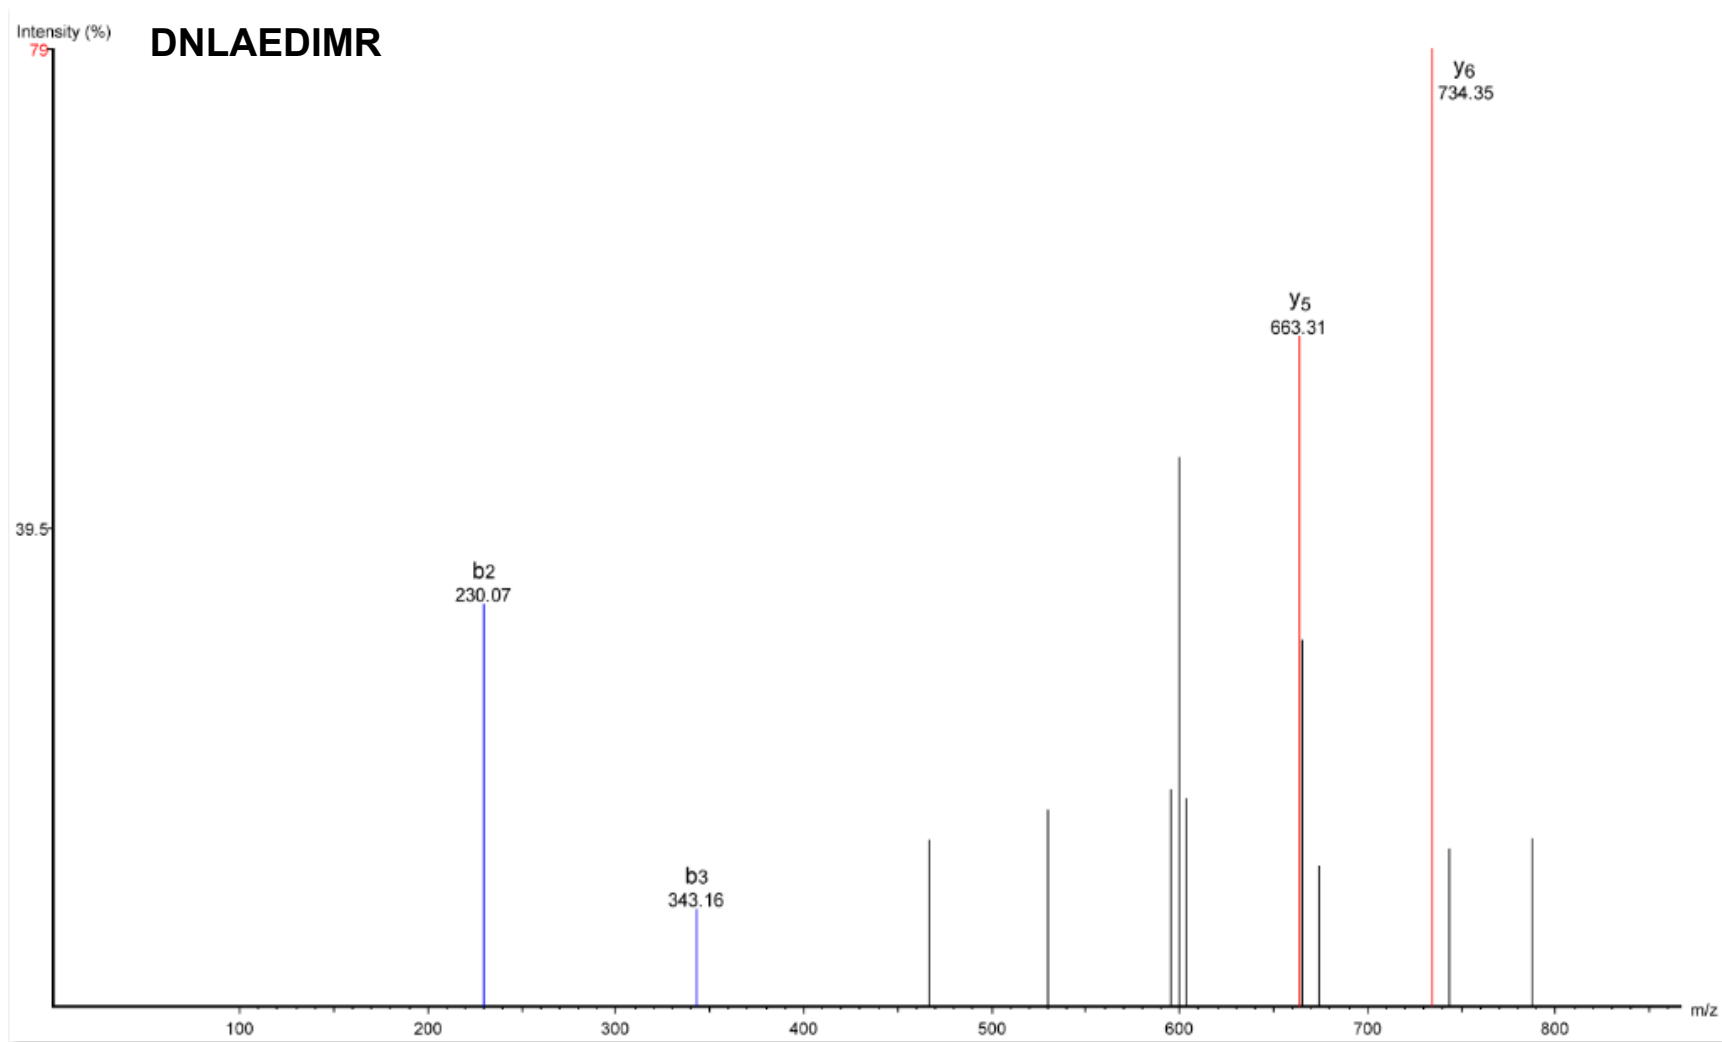

MS/MS spectrum of the peptide DNLAEDIMR identified from human vimentin (P08670). Deisotoped peptide ion m/z: 1076.50<sup>+1</sup>.



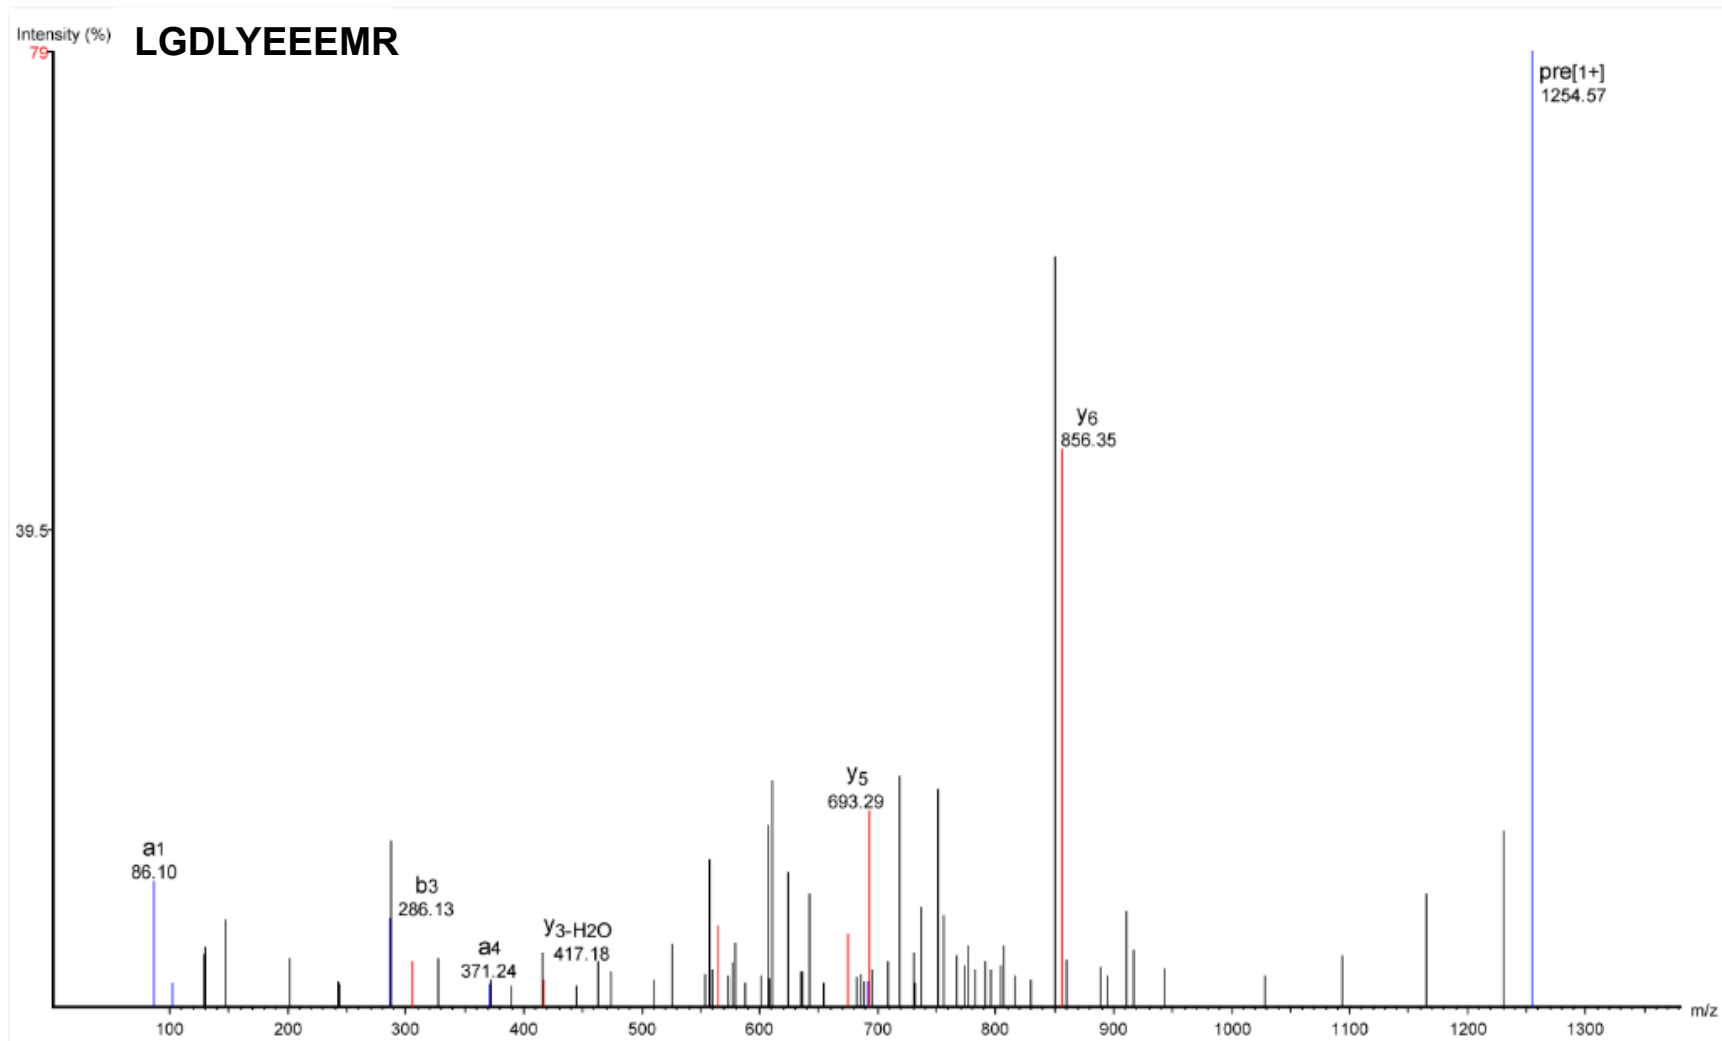

MS/MS spectrum of the peptide LGDLYEEEMR identified from human vimentin (P08670). Deisotoped peptide ion m/z: 1254.57<sup>+1</sup>.

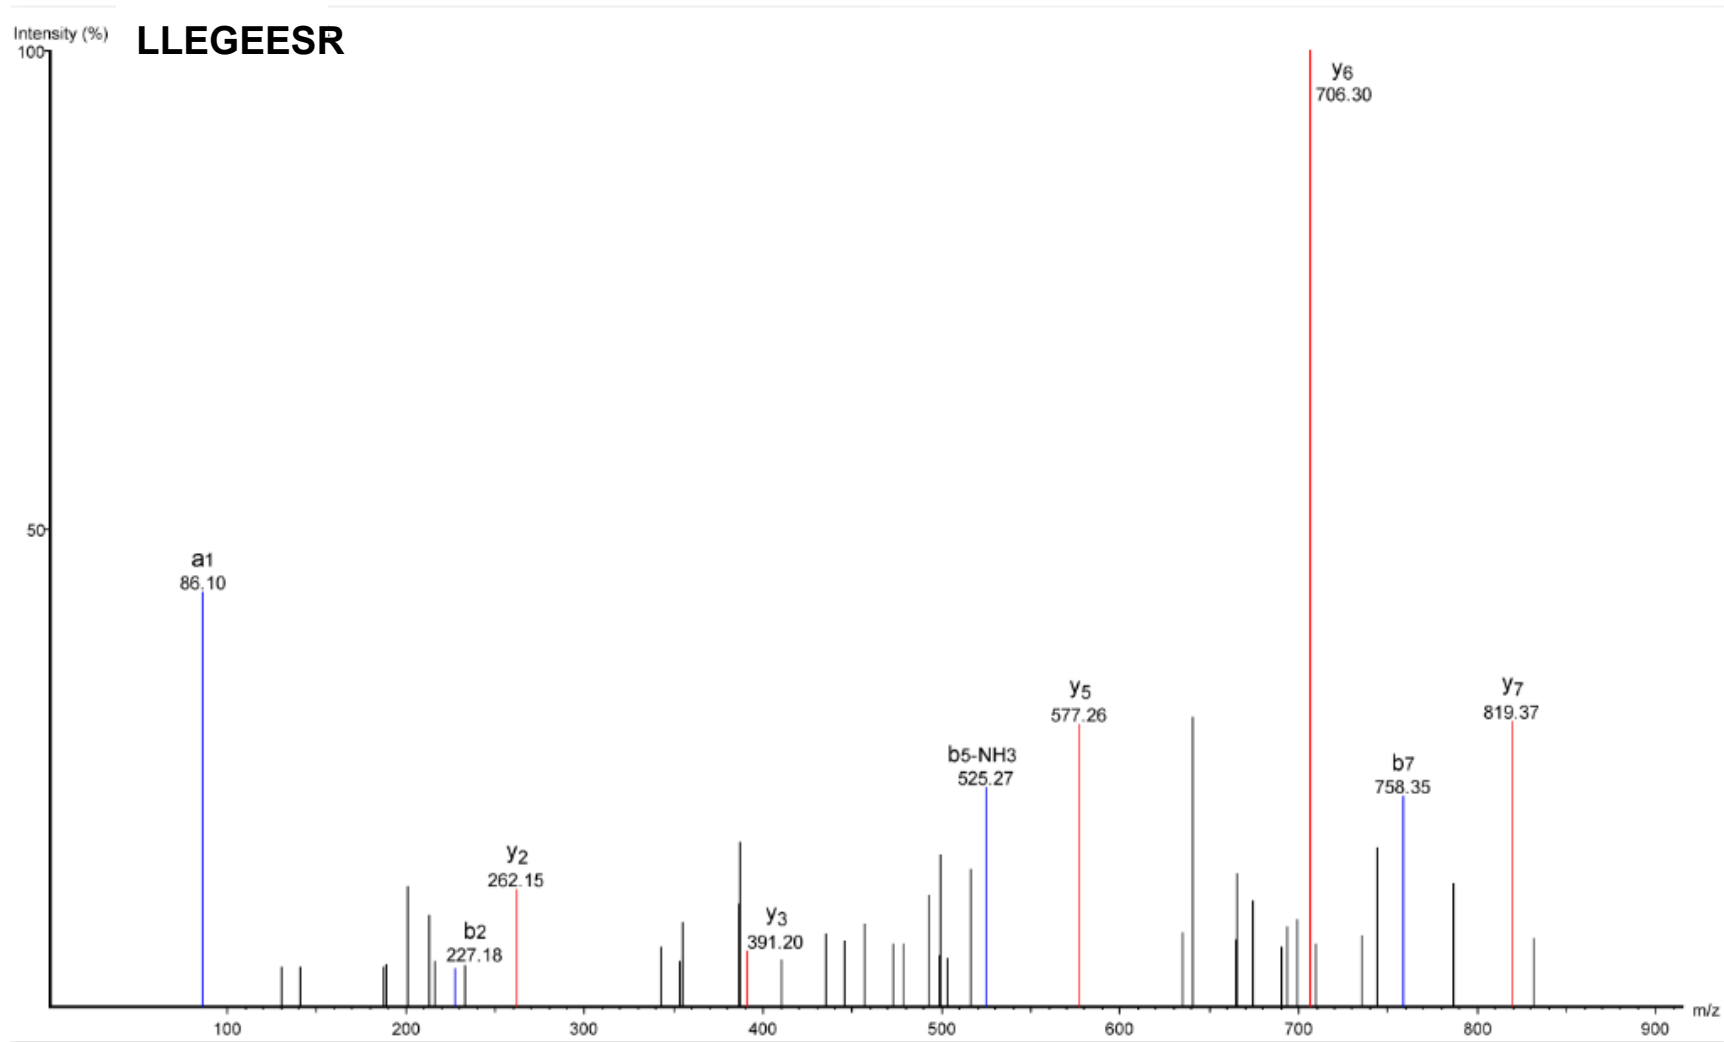

MS/MS spectrum of the peptide LLEGEESR identified from human vimentin (P08670). Deisotoped peptide ion m/z: 932.46<sup>+1</sup>.
